# Supplementary material for: Rapid in vitro generation of bona fide exhausted CD8+ T cells is accompanied by Tcf7 promotor methylation
Source: PubMed Central journal article supplement (PMC7340326; doi:10.1371/journal.ppat.1008555), 2020-06-24
Supplement: ppat.1008555.s007.pdf [file ppat.1008555.s007.pdf]

**Repeat peptide stimulated cells versus single peptide stimulated cells**

| GeneName      | baseMean   | log2FoldChange | padj       |
|---------------|------------|----------------|------------|
| 0610009L18Rik | 201.755764 | -1.277960455   | 5.78E-10   |
| 0610040F04Rik | 157.463514 | 1.005966933    | 1.97E-05   |
| 0610043K17Rik | 246.423422 | -1.890880273   | 1.78E-09   |
| 1110004E09Rik | 713.97038  | 1.132302939    | 9.18E-08   |
| 1110032F04Rik | 497.463112 | 1.334317684    | 1.71E-09   |
| 1110034G24Rik | 1260.61844 | -1.212866741   | 5.04E-06   |
| 1110038B12Rik | 1041.92657 | 1.140144129    | 3.50E-25   |
| 1500015A07Rik | 173.053305 | -1.025085142   | 2.97E-08   |
| 1600014C10Rik | 141.232962 | -1.266496621   | 1.97E-17   |
| 1700012B07Rik | 148.845126 | 1.273366292    | 0.00048402 |
| 1700016L21Rik | 688.01262  | -2.909133086   | 1.79E-13   |
| 1700019D03Rik | 127.658139 | 1.207694085    | 2.28E-11   |
| 1700025G04Rik | 5549.57115 | -1.992945691   | 1.19E-16   |
| 1700029H14Rik | 213.319125 | -2.077799804   | 1.09E-12   |
| 1700061G19Rik | 298.832636 | -1.338453548   | 4.87E-15   |
| 1700093J21Rik | 144.711729 | -1.394182318   | 3.47E-10   |
| 1700097N02Rik | 260.085145 | -1.185653388   | 6.79E-07   |
| 1700113A16Rik | 336.907184 | -1.107496337   | 4.11E-09   |
| 1810006J02Rik | 107.815508 | -1.024822621   | 0.0017972  |
| 1810055G02Rik | 362.254473 | 1.051476986    | 2.80E-06   |
| 1810062O18Rik | 144.742803 | -1.222906118   | 5.40E-07   |
| 2010016I18Rik | 246.576404 | -1.416294018   | 0.00014416 |
| 2310002F09Rik | 281.517829 | -1.696794234   | 1.43E-06   |
| 2310015A10Rik | 790.314245 | -1.494037491   | 4.21E-05   |
| 2410004P03Rik | 102.689452 | 1.046458183    | 3.26E-05   |
| 2500002B13Rik | 215.217327 | 1.043199156    | 1.19E-05   |
| 2610027K06Rik | 106.043246 | -1.09139961    | 1.93E-09   |
| 2610035D17Rik | 5450.18857 | -1.553342416   | 2.02E-18   |
| 2610037D02Rik | 1134.25854 | -1.084916316   | 0.02077512 |
| 2810001G20Rik | 474.674802 | -2.164396653   | 2.49E-23   |
| 2810025M15Rik | 113.95226  | 1.505864525    | 1.22E-07   |
| 2810429I04Rik | 142.110463 | 1.661204133    | 2.27E-10   |
| 2810474O19Rik | 7936.50803 | -1.887798969   | 2.60E-31   |
| 2900026A02Rik | 458.233558 | 2.443320541    | 2.38E-26   |
| 3110009E18Rik | 843.4786   | -1.392313753   | 0.00014612 |
| 3110056K07Rik | 1235.08351 | -1.038234307   | 1.19E-06   |
| 3632454L22Rik | 261.47648  | -1.763420197   | 1.79E-10   |
| 4632404H12Rik | 456.360162 | -1.356728656   | 0.00039228 |
| 4632427E13Rik | 647.671545 | -1.087590612   | 0.00690033 |
| 4732487G21Rik | 448.448723 | -1.194466783   | 1.22E-14   |
| 4831440E17Rik | 104.813391 | -1.056140851   | 1.29E-06   |
| 4833422C13Rik | 495.782719 | -2.243542281   | 1.06E-13   |
| 4930417H01Rik | 140.901783 | -1.535943467   | 4.21E-10   |
| 4930431P19Rik | 108.956427 | -1.044264457   | 4.31E-06   |
| 4930452B06Rik | 180.134784 | 2.03889756     | 9.40E-21   |
| 4930481A15Rik | 563.544076 | -1.76909401    | 1.50E-07   |
| 4930503L19Rik | 1140.69694 | 1.017402433    | 9.21E-07   |
| 4930519F09Rik | 571.567524 | -1.079212494   | 0.01873979 |

**S1 Table**

Differentially expressed genes in repeat peptide stimulated T cells determined by RNAseq. Log2 fold change is show for repeat peptide OT-I versus single peptide stimulated OT-I. After 5 day cultures, cells were sorted and RNAseq was performed. Genes with >2 fold change and padj value < 0.05 shown.

|               |            |              |            |
|---------------|------------|--------------|------------|
| 4930523C07Rik | 7111.78017 | -1.266950845 | 1.75E-16   |
| 4930539E08Rik | 181.975224 | 1.013466282  | 0.000217   |
| 4930562C15Rik | 289.857266 | -1.210972181 | 1.64E-16   |
| 4930581F22Rik | 546.072963 | -1.00856743  | 0.00013811 |
| 4930595D18Rik | 185.268467 | -1.227033709 | 8.17E-07   |
| 4930599N23Rik | 242.191857 | -1.242924152 | 4.56E-10   |
| 4931403E22Rik | 210.427455 | -1.362198561 | 1.96E-08   |
| 4931406G06Rik | 120.565936 | 1.491473677  | 1.04E-06   |
| 4933406I18Rik | 4224.68286 | -1.4319444   | 1.68E-05   |
| 4933440M02Rik | 1121.16328 | -5.019846897 | 2.65E-180  |
| 5031434O11Rik | 249.00109  | -1.309540211 | 1.95E-17   |
| 5430427O19Rik | 415.306351 | -1.132245741 | 0.0037465  |
| 5430431A17Rik | 96.1828446 | -1.280930112 | 4.45E-07   |
| 5730508B09Rik | 3328.92212 | -2.549236371 | 1.89E-26   |
| 5830411N06Rik | 1390.92189 | -3.530640426 | 8.52E-21   |
| 5930435M05Rik | 78.1306874 | -1.088296906 | 9.07E-05   |
| 6430571L13Rik | 144.319576 | 1.401224378  | 3.00E-08   |
| 9330104G04Rik | 155.48361  | -1.247822332 | 1.95E-09   |
| 9330136K24Rik | 301.267476 | 1.073266597  | 1.60E-11   |
| 9330175E14Rik | 728.519759 | -2.01437599  | 8.93E-12   |
| 9330198N18Rik | 239.59375  | -1.079897164 | 0.00018411 |
| 9430015G10Rik | 1007.01695 | 1.082508547  | 7.32E-11   |
| A230072E10Rik | 304.54998  | -1.366868633 | 2.97E-05   |
| A330040F15Rik | 359.522083 | -1.263278846 | 0.00026245 |
| A430046D13Rik | 371.471542 | -1.26546001  | 2.49E-09   |
| A430078G23Rik | 5454.74589 | -2.438013784 | 8.90E-15   |
| A530021J07Rik | 105.601109 | -1.552433655 | 3.43E-08   |
| A530072M11Rik | 744.690283 | -1.344114564 | 1.17E-05   |
| A630014C17Rik | 300.15033  | -1.825075226 | 8.68E-13   |
| A630023P12Rik | 123.070368 | -1.227348929 | 0.00020506 |
| A730081D07Rik | 526.670774 | -1.762478289 | 3.66E-06   |
| A930002I21Rik | 381.601297 | -3.390673598 | 2.34E-41   |
| A930005H10Rik | 463.216403 | -2.213257447 | 6.26E-17   |
| A930007I19Rik | 283.115374 | -1.026655303 | 0.0001179  |
| AA467197      | 1635.75245 | -3.826983179 | 4.10E-28   |
| Aaas          | 2122.58274 | 1.141188114  | 1.77E-13   |
| Aaed1         | 1176.27732 | -1.078815803 | 7.34E-12   |
| Aars          | 4166.52487 | 1.781077376  | 3.42E-20   |
| AB124611      | 1936.77005 | -1.793949354 | 1.31E-36   |
| Abca1         | 637.596717 | -1.350922444 | 4.33E-05   |
| Abcb11        | 81.0543881 | -1.05737461  | 0.00023583 |
| Abcb1a        | 819.99539  | -1.66475352  | 7.77E-08   |
| Abcb4         | 173.239607 | 1.227029937  | 1.01E-09   |
| Abcc10        | 582.293293 | -1.044699494 | 5.49E-06   |
| Abcd3         | 2096.09023 | 1.978137615  | 5.48E-26   |
| Abcf2         | 3080.86598 | 1.20306454   | 3.09E-10   |
| Abcg1         | 3555.09412 | -2.364192707 | 1.69E-98   |
| Abcg3         | 729.600987 | -1.017699875 | 6.14E-05   |
| Abhd15        | 585.059232 | -1.693971821 | 3.13E-23   |
| Abhd4         | 531.931195 | 2.059130891  | 3.04E-14   |

|            |            |              |            |
|------------|------------|--------------|------------|
| Abi2       | 1781.5438  | 2.01123681   | 2.29E-31   |
| Abi3       | 147.445927 | -1.49264521  | 1.18E-15   |
| Ablim2     | 254.587863 | -1.509432353 | 1.77E-09   |
| Abr        | 4267.51624 | -1.064799925 | 6.39E-21   |
| AC108401.3 | 251.298497 | -1.341232258 | 2.95E-11   |
| AC124680.1 | 668.634527 | -2.496536894 | 0.00206902 |
| AC133498.1 | 567.020266 | 3.818688979  | 3.93E-29   |
| AC133650.3 | 104.906227 | -1.201123133 | 2.79E-06   |
| AC153495.1 | 1124.18256 | -4.619726223 | 1.66E-35   |
| AC153862.2 | 1819.05338 | -1.788457653 | 2.21E-16   |
| AC153899.1 | 191.511171 | -1.092005578 | 4.12E-11   |
| AC154682.1 | 316.141552 | -1.134812766 | 2.50E-06   |
| AC156795.1 | 340.470128 | 1.125941811  | 0.0001512  |
| AC157822.3 | 682.505874 | -1.791452905 | 2.87E-06   |
| AC158388.3 | 355.992927 | -2.32517399  | 0.00040448 |
| AC160405.2 | 220.769412 | -1.0626912   | 1.89E-11   |
| AC163032.1 | 448.311304 | -1.421147506 | 6.07E-16   |
| AC163354.1 | 218.521833 | 1.620938898  | 3.79E-05   |
| AC163623.3 | 85.9125347 | -1.00797423  | 5.56E-05   |
| AC164426.2 | 727.476841 | -1.112476949 | 4.13E-07   |
| AC167978.1 | 118.390689 | -1.192513239 | 2.31E-05   |
| Acad10     | 504.000352 | -1.298254147 | 2.92E-05   |
| Acot2      | 429.671182 | -1.061043245 | 3.36E-09   |
| Acot7      | 3380.92754 | 1.721215533  | 2.33E-20   |
| Acpp       | 564.886907 | -3.199041339 | 2.60E-20   |
| Acsbg1     | 1031.01781 | -1.259837369 | 6.72E-08   |
| Acsf2      | 1804.82861 | -1.356456467 | 4.63E-17   |
| Acl3       | 620.226146 | 1.695092751  | 7.55E-22   |
| Acl6       | 296.549161 | 3.032225858  | 1.81E-29   |
| Acss2      | 938.536656 | -1.725505634 | 2.16E-24   |
| Actg1      | 29511.8181 | 1.016647686  | 0.00249174 |
| Actn1      | 6808.44206 | -2.330475557 | 1.81E-36   |
| Actn2      | 383.023003 | -1.1475751   | 7.35E-05   |
| Acvr1      | 359.871775 | 2.481499639  | 5.21E-33   |
| Acvr1b     | 1183.42091 | -1.037791711 | 1.19E-07   |
| Acvr1l     | 311.684069 | -2.731477346 | 3.10E-18   |
| Adam19     | 5915.68221 | -1.166504949 | 1.75E-12   |
| Adam8      | 247.379592 | 1.055781326  | 5.90E-05   |
| Adamts14   | 732.355192 | 3.559494119  | 4.37E-44   |
| Adamts6    | 7759.45561 | 2.007284444  | 2.28E-08   |
| Adamtsl4   | 263.12519  | -1.243968481 | 0.00025845 |
| Adap1      | 1447.48992 | 1.443769302  | 7.29E-08   |
| Adarb1     | 678.758628 | 2.768935442  | 4.08E-51   |
| Adarb2     | 168.397407 | 1.532075752  | 2.98E-06   |
| Add3       | 12553.5344 | -1.275378179 | 5.33E-12   |
| Adgrb2     | 142.785251 | -1.352388997 | 1.08E-05   |
| Adgrd1     | 137.77894  | -1.936858969 | 7.25E-22   |
| Adgrg3     | 110.873364 | -1.396308382 | 1.45E-05   |
| Adgrg5     | 2222.61055 | -2.055069518 | 2.45E-31   |
| Adh4       | 129.541352 | 1.407011257  | 1.07E-08   |

|            |            |              |            |
|------------|------------|--------------|------------|
| Adora2b    | 232.032376 | 2.186515051  | 9.46E-31   |
| Adrb2      | 362.215285 | -2.261390764 | 5.35E-20   |
| Adssl1     | 305.77701  | 1.261829392  | 1.25E-05   |
| Aebp1      | 215.592036 | 1.34984828   | 1.01E-09   |
| Afp        | 106.567809 | -1.152709793 | 6.42E-09   |
| Agtrap     | 1014.54963 | -1.009373808 | 8.54E-08   |
| Ahr        | 179.129958 | -1.200676269 | 4.79E-07   |
| Ahrr       | 191.506962 | -1.747912969 | 1.14E-09   |
| Al506816   | 8027.93668 | 1.164599428  | 1.20E-10   |
| Al847159   | 220.874664 | -1.279893861 | 1.18E-12   |
| Aim2       | 5118.79966 | -1.272376878 | 0.00229188 |
| Ajuba      | 119.071312 | 1.414915672  | 5.22E-08   |
| Ak2        | 3128.62175 | 1.235400374  | 3.90E-08   |
| Ak4        | 971.069788 | 2.358254125  | 1.73E-07   |
| Ak6        | 588.881724 | 1.24779094   | 6.87E-17   |
| Ak8        | 115.293273 | -1.254521341 | 9.14E-12   |
| Akap1      | 895.467557 | 1.042747944  | 2.59E-10   |
| Akap5      | 258.280046 | -1.023142266 | 1.70E-05   |
| Akr1c13    | 282.879243 | -1.933070654 | 3.99E-09   |
| Akr1e1     | 476.230487 | 1.403923218  | 2.87E-15   |
| AL513022.1 | 97.3965376 | 1.388232502  | 2.59E-13   |
| AL589871.2 | 111.280631 | 1.649725259  | 7.73E-06   |
| Alad       | 616.026169 | 1.411769877  | 1.40E-13   |
| Alcam      | 2863.85921 | 2.599058319  | 7.73E-18   |
| Aldh18a1   | 4157.63953 | 1.236105524  | 4.80E-13   |
| Aldh1l2    | 120.992697 | 1.622363172  | 2.26E-08   |
| Aldh3b1    | 232.075721 | -1.607973083 | 3.07E-09   |
| Aldh7a1    | 612.063412 | 1.211050698  | 7.14E-07   |
| Aldoc      | 733.676852 | -1.731442684 | 7.12E-05   |
| Alg8       | 1365.12731 | 1.025526479  | 1.72E-08   |
| Alpk2      | 736.810713 | 1.154178953  | 0.00022896 |
| Alyref     | 4726.83089 | 1.309919911  | 2.77E-06   |
| Amdhd1     | 129.084992 | -1.385708246 | 9.57E-11   |
| Amigo2     | 303.299136 | -1.716326988 | 4.56E-08   |
| Ampd1      | 289.101641 | -1.495624795 | 1.82E-10   |
| Ampd3      | 157.083628 | -1.091569779 | 1.62E-06   |
| Amy1       | 567.596112 | -1.446080145 | 1.06E-05   |
| Angptl4    | 421.472225 | 1.163019912  | 3.07E-06   |
| Ank        | 3136.59586 | -1.503704558 | 9.50E-17   |
| Ank3       | 96.4389354 | 1.274556721  | 5.57E-08   |
| Ankmy1     | 110.197651 | -1.216209193 | 3.76E-12   |
| Ankrd13b   | 889.439776 | 2.038893709  | 5.67E-21   |
| Ankrd33b   | 235.150847 | 3.063050352  | 1.17E-26   |
| Ankrd52    | 3196.00001 | 1.267459379  | 4.11E-11   |
| Anxa2      | 6945.13191 | 1.351010286  | 0.0006341  |
| Ap3m2      | 1006.21162 | -1.70288873  | 9.72E-19   |
| Apbb1ip    | 9806.51678 | -1.332385047 | 4.53E-08   |
| Apc2       | 193.479228 | -1.086750585 | 4.59E-09   |
| Apol7e     | 2005.24972 | -2.894183834 | 6.41E-51   |
| Aqp10-ps   | 97.6838487 | -1.037218389 | 0.00067728 |

|          |            |              |            |
|----------|------------|--------------|------------|
| Aqp3     | 381.626413 | -2.08721889  | 2.50E-13   |
| Aqp9     | 639.351341 | -3.831214902 | 3.84E-30   |
| Arc      | 221.26135  | 1.004772252  | 0.00080866 |
| Arfgef3  | 408.468939 | 2.705074724  | 7.21E-13   |
| Arhgap15 | 73352.4505 | -1.335057376 | 0.00013741 |
| Arhgap21 | 2252.51046 | 1.61277153   | 1.76E-13   |
| Arhgap23 | 146.302521 | 1.241457553  | 5.09E-12   |
| Arhgap24 | 267.017843 | 2.515266873  | 4.86E-17   |
| Arhgap25 | 5362.15474 | -1.238642922 | 5.48E-09   |
| Arhgap4  | 4050.23913 | -1.115585119 | 1.83E-14   |
| Arhgap45 | 17994.4464 | -1.242426697 | 9.29E-11   |
| Arhgap6  | 97.7425403 | -1.192436002 | 0.00163306 |
| Arhgdig  | 284.425104 | 1.753135435  | 5.36E-11   |
| Arhgef11 | 791.715658 | -1.297403251 | 5.17E-12   |
| Arhgef18 | 9968.83645 | -2.428792683 | 1.13E-26   |
| Arhgef25 | 198.702717 | 2.281147809  | 5.08E-20   |
| Arhgef3  | 15125.2807 | -1.003921233 | 1.35E-06   |
| Arhgef40 | 184.677077 | 1.307778182  | 8.91E-13   |
| Arhgef5  | 141.839634 | 1.292784616  | 4.93E-07   |
| Arhgef9  | 993.153353 | 3.096787204  | 4.36E-18   |
| Arl14ep  | 2200.91236 | 1.820945471  | 1.73E-44   |
| Arl4c    | 11138.3176 | -3.886515032 | 2.20E-64   |
| Arl5c    | 2434.19655 | -2.697440738 | 1.90E-56   |
| Arl6     | 254.319739 | 1.667495508  | 4.06E-21   |
| Armc3    | 176.105426 | -1.728074272 | 3.24E-20   |
| Armc7    | 1931.61985 | -1.271729993 | 3.84E-24   |
| Arntl2   | 125.887408 | 1.667172867  | 8.88E-10   |
| Arrdc4   | 109.749829 | -1.131815026 | 0.0001307  |
| Art2a-ps | 117.701603 | -1.172761186 | 2.29E-05   |
| Art2b    | 1166.79715 | -4.503040704 | 3.99E-42   |
| Art4     | 257.960029 | -1.443499872 | 1.09E-14   |
| Arv1     | 892.065727 | -1.056161551 | 2.69E-05   |
| As3mt    | 170.67135  | 1.534162857  | 1.61E-10   |
| Asap1    | 16716.1526 | -1.987900636 | 6.89E-15   |
| Asb13    | 1022.11699 | -1.06667682  | 1.25E-05   |
| Asns     | 1434.50271 | 3.601494006  | 2.71E-42   |
| Asph     | 701.185047 | 2.876210713  | 1.45E-28   |
| Atad5    | 3514.40908 | 1.037123864  | 1.73E-07   |
| Atcay    | 218.148339 | 1.333421675  | 2.24E-10   |
| Atf3     | 929.957202 | 1.627412573  | 0.00760761 |
| Atf4     | 4560.49137 | 1.583283697  | 7.01E-10   |
| Atg10    | 3212.4646  | -1.133941615 | 0.00102798 |
| Atg9b    | 392.646276 | 1.091021091  | 0.00012626 |
| Atp10d   | 3009.8506  | -1.943097269 | 3.91E-12   |
| Atp13a2  | 674.610172 | 1.192487489  | 5.41E-07   |
| Atp1b1   | 1154.38132 | -2.171769141 | 1.31E-32   |
| Atp1b3   | 17285.7267 | -1.334821874 | 6.36E-29   |
| Atp2a2   | 7754.79201 | 1.115960945  | 4.70E-15   |
| Atp5b    | 23324.9475 | 1.314193225  | 5.64E-07   |
| Atp5g3   | 4003.56624 | 1.033097994  | 8.65E-06   |

|               |            |              |            |
|---------------|------------|--------------|------------|
| Atp6v0a1      | 156.075065 | 1.857207298  | 3.83E-23   |
| Atp7b         | 200.021286 | 1.344524537  | 0.00082071 |
| Atp8a1        | 6816.93803 | -1.429048558 | 2.51E-07   |
| Atp8a2        | 261.087595 | -1.128504967 | 8.56E-06   |
| AU019990      | 179.704721 | -2.009098471 | 1.70E-13   |
| AU021092      | 79.5445862 | -1.151257389 | 1.35E-05   |
| Aunip         | 628.662196 | 1.60740893   | 1.73E-16   |
| Aurka         | 1444.67827 | 1.30193908   | 1.16E-06   |
| Aurkb         | 2359.47941 | 1.451135213  | 7.17E-07   |
| Auts2         | 1876.92857 | -2.621848058 | 1.85E-13   |
| Axdnd1        | 164.28224  | -1.306540453 | 8.81E-11   |
| Axin2         | 1061.43613 | -1.886131764 | 1.38E-24   |
| Axl           | 613.113821 | 2.335407608  | 2.60E-16   |
| B230217O12Rik | 590.579298 | -1.099140499 | 0.00026772 |
| B3galt4       | 285.045327 | -1.354911152 | 4.36E-09   |
| B430306N03Rik | 189.713821 | -1.325933916 | 1.21E-13   |
| B4galt1       | 10341.9175 | -1.184531084 | 1.73E-20   |
| B4galt7       | 1156.40456 | -1.174383353 | 4.65E-14   |
| Bace2         | 95.7993722 | 1.371784829  | 4.61E-08   |
| Bach1         | 1339.38644 | -1.758775373 | 2.80E-64   |
| Bag2          | 408.700788 | 1.039447625  | 3.99E-10   |
| Bag3          | 357.378599 | 1.013259914  | 0.00020074 |
| Baiap3        | 952.176222 | -3.480545176 | 2.51E-62   |
| Bambi-ps1     | 344.760748 | -1.812004273 | 1.94E-08   |
| Bard1         | 4458.78859 | 1.18425848   | 1.19E-05   |
| Basp1         | 542.020168 | 2.644653739  | 5.15E-13   |
| Batf3         | 738.668081 | 4.309664604  | 3.78E-65   |
| BB557941      | 118.667207 | 1.191233509  | 9.39E-06   |
| Bbof1         | 270.456017 | -1.712033047 | 8.99E-12   |
| Bbs5          | 116.203468 | 1.430002072  | 1.72E-13   |
| BC030867      | 885.1412   | 1.79410761   | 7.39E-13   |
| BC035044      | 764.586401 | 1.884891951  | 7.56E-07   |
| BC043934      | 371.697314 | -2.310141487 | 1.44E-34   |
| BC055324      | 1220.78799 | 1.21967799   | 2.50E-07   |
| BC147527      | 614.876449 | -2.155628918 | 7.88E-28   |
| Bcam          | 94.0617281 | 1.078489578  | 0.00026006 |
| Bcar1         | 114.197052 | 1.241310033  | 0.00134849 |
| Bcas3         | 7086.43151 | -1.048895366 | 0.00026899 |
| Bcat1         | 2888.37262 | 3.361287654  | 6.77E-90   |
| Bcl11b        | 13953.6961 | -1.351996477 | 1.22E-08   |
| Bcl3          | 580.903939 | -1.323685602 | 4.92E-06   |
| Bcl6          | 423.377001 | -1.32897167  | 1.82E-14   |
| Bcl7c         | 772.401971 | 1.092998337  | 2.44E-05   |
| Bcl9l         | 3892.90686 | -1.958818815 | 7.02E-37   |
| Bcr           | 2673.42525 | 1.024794154  | 1.56E-08   |
| BE692007      | 700.426465 | -1.251336355 | 0.00035883 |
| Bhlha15       | 182.439489 | -1.272123566 | 3.66E-12   |
| Bhlhe40       | 5994.87963 | 2.392200128  | 1.55E-05   |
| Bicd1         | 195.25731  | 2.245717343  | 5.17E-22   |
| Bin1          | 2925.75155 | -1.047781539 | 4.66E-10   |

|               |            |              |            |
|---------------|------------|--------------|------------|
| Bin2          | 8902.6004  | -1.320582726 | 8.42E-14   |
| Blm           | 3607.45364 | 1.390531446  | 1.18E-12   |
| Blvrb         | 207.556854 | -1.023451317 | 6.54E-07   |
| Bmpr2         | 894.154906 | 1.183168629  | 1.24E-16   |
| Bnip3         | 733.304101 | 1.33339368   | 3.52E-05   |
| Bnipl         | 148.695603 | -1.175553656 | 1.10E-06   |
| Boc           | 93.884334  | 1.432634229  | 6.73E-08   |
| Boll          | 818.333648 | -1.359350637 | 2.25E-05   |
| Borcs8        | 1617.43847 | -1.184950406 | 7.32E-11   |
| Brca1         | 3778.604   | 1.19378118   | 8.36E-07   |
| Brca2         | 2326.54882 | 1.241275286  | 2.22E-09   |
| Bsg           | 6764.88929 | 1.27551364   | 4.94E-06   |
| Bsn           | 248.720927 | -1.394819055 | 5.17E-16   |
| Bspry         | 507.644484 | 2.666788303  | 7.94E-20   |
| Btbd11        | 4872.5367  | -1.24971795  | 1.59E-05   |
| Btbd8         | 630.864147 | 1.099035634  | 8.32E-07   |
| Btg1          | 12895.4306 | -1.510187898 | 1.43E-13   |
| Btnl7-ps      | 148.357704 | -1.15210006  | 2.90E-08   |
| Bub1          | 2500.63584 | 1.419750355  | 5.90E-07   |
| Bub1b         | 4179.26491 | 1.241494303  | 4.31E-06   |
| C030029H02Rik | 1011.13805 | 1.084086504  | 0.00047606 |
| C030034L19Rik | 146.278602 | -1.932494476 | 1.39E-09   |
| C130036L24Rik | 443.908097 | -1.592212129 | 9.84E-07   |
| C1qbp         | 3433.78555 | 1.319622055  | 1.21E-09   |
| C1qtnf12      | 298.891717 | 1.044868703  | 1.45E-05   |
| C1qtnf6       | 315.803858 | 1.126863441  | 0.00087367 |
| C230024C17Rik | 98.9783709 | 1.034136905  | 2.23E-09   |
| C230037L18Rik | 156.469452 | -1.034845432 | 0.00308778 |
| C530008M17Rik | 215.015453 | -1.228549533 | 2.06E-06   |
| C77080        | 197.745129 | 1.224532545  | 7.68E-09   |
| Cacna1c       | 152.23957  | 1.4220268    | 3.94E-09   |
| Cacna1s       | 244.879686 | -2.445638762 | 0.00322676 |
| Cacna2d4      | 617.178838 | -3.003942559 | 1.92E-77   |
| Cacnb1        | 432.333103 | -1.717326138 | 2.91E-13   |
| Cacnb3        | 222.554802 | -1.689017592 | 6.65E-11   |
| Cad           | 6696.52929 | 1.47573189   | 7.53E-09   |
| Calcoco1      | 972.038274 | -1.66499896  | 4.86E-15   |
| Calml4        | 199.062644 | -1.107102998 | 2.30E-11   |
| Calr          | 13447.2712 | 1.035607449  | 0.00090161 |
| Camk1d        | 16103.2617 | -1.14087951  | 4.58E-05   |
| Camkk1        | 210.894373 | -1.021584905 | 7.24E-08   |
| Canx          | 12814.5777 | 1.059355472  | 4.88E-08   |
| Capg          | 2577.47926 | 2.275609454  | 6.73E-16   |
| Capn3         | 325.442792 | -1.296728613 | 1.17E-20   |
| Capsl         | 198.748165 | 1.300025231  | 1.87E-07   |
| Card10        | 107.810381 | 1.085678398  | 8.95E-07   |
| Card11        | 8150.12354 | -1.271371377 | 5.48E-08   |
| Card14        | 335.71114  | -2.581319985 | 7.37E-30   |
| Card6         | 2045.18306 | -1.751129061 | 6.02E-16   |
| Carns1        | 625.01004  | -1.942216837 | 5.95E-08   |

|         |            |              |            |
|---------|------------|--------------|------------|
| Cars    | 2331.68436 | 2.295351072  | 3.93E-29   |
| Casp3   | 4852.21071 | 1.854007432  | 1.96E-13   |
| Casz1   | 617.184283 | -1.783417973 | 1.31E-22   |
| Cavin3  | 96.9556822 | 1.502372779  | 2.40E-06   |
| Cbarp   | 506.354604 | 1.067043427  | 0.00025734 |
| Cblb    | 43637.3303 | 1.262285179  | 1.35E-06   |
| Cbx5    | 10885.3121 | 1.196897601  | 2.61E-08   |
| Cbx7    | 3074.46469 | -1.38705351  | 1.25E-08   |
| Cby1    | 324.232079 | 1.21757647   | 7.95E-09   |
| Ccdc112 | 154.561017 | 1.425856622  | 1.38E-14   |
| Ccdc124 | 1014.55235 | 1.047136369  | 0.00013732 |
| Ccdc14  | 635.007481 | 1.227795812  | 9.41E-08   |
| Ccdc141 | 726.422216 | 1.653206481  | 5.87E-11   |
| Ccdc152 | 206.903946 | -1.294336547 | 7.69E-12   |
| Ccdc162 | 420.3682   | -1.107495704 | 5.77E-07   |
| Ccdc171 | 2011.50698 | -1.294302658 | 8.65E-05   |
| Ccdc18  | 713.163056 | 1.017100721  | 0.00016197 |
| Ccdc184 | 133.48658  | 1.953179357  | 5.81E-11   |
| Ccdc30  | 355.932956 | -1.17562072  | 1.41E-07   |
| Ccdc50  | 6797.35823 | 1.349864485  | 2.65E-20   |
| Ccdc57  | 485.063841 | 2.062867471  | 4.37E-18   |
| Ccdc58  | 1679.16496 | 1.018033804  | 7.49E-07   |
| Ccdc88a | 312.211798 | 1.567333688  | 1.25E-20   |
| Ccl3    | 783.77295  | 2.783265922  | 4.07E-07   |
| Ccl4    | 473.044957 | 1.661063202  | 0.00011354 |
| Ccl5    | 783.962418 | -2.085578964 | 2.61E-11   |
| Ccm2    | 6243.98465 | -1.191265885 | 1.77E-06   |
| Ccna2   | 4028.49398 | 1.163722167  | 0.00039823 |
| Ccnb1   | 2465.09806 | 1.84893288   | 2.13E-08   |
| Ccnd1   | 133.420293 | -1.050629396 | 1.20E-11   |
| Ccnd3   | 14168.5133 | -1.310273386 | 9.60E-08   |
| Ccp110  | 1294.49113 | 1.49672603   | 1.81E-17   |
| Ccr2    | 323.872772 | -1.665451804 | 0.00430345 |
| Ccr4    | 419.483029 | 2.165146649  | 7.82E-12   |
| Ccr5    | 870.661505 | -1.899436835 | 0.00150186 |
| Ccr6    | 189.850477 | 2.749570845  | 7.38E-27   |
| Ccr9    | 161.699348 | -1.02836866  | 0.00027022 |
| Ccser1  | 174.183037 | 1.670078787  | 8.82E-13   |
| Cct3    | 7121.8962  | 1.203428698  | 1.47E-12   |
| Cct6a   | 8555.7231  | 1.371055106  | 5.46E-11   |
| Cct7    | 8242.52566 | 1.217466332  | 1.40E-09   |
| Cct8    | 9087.63959 | 1.064726523  | 5.91E-08   |
| Cd163l1 | 796.906964 | -2.789119773 | 5.35E-20   |
| Cd1d1   | 377.267099 | -1.79370775  | 1.55E-18   |
| Cd200   | 1089.41773 | 2.355366601  | 1.57E-29   |
| Cd200r4 | 231.166888 | -2.105673643 | 1.18E-16   |
| Cd226   | 9496.21641 | -3.259855945 | 3.83E-14   |
| Cd247   | 17302.5968 | -1.244270679 | 3.48E-09   |
| Cd24a   | 196.112541 | 1.244301826  | 7.98E-06   |
| Cd37    | 2409.9843  | -1.086981797 | 1.08E-11   |



|            |            |              |            |
|------------|------------|--------------|------------|
| Cd44       | 7824.54986 | 2.493437571  | 1.85E-16   |
| Cd46       | 595.192621 | -1.183043221 | 0.00064529 |
| Cd48       | 7318.06628 | -1.345135974 | 1.32E-36   |
| Cd52       | 7316.65663 | -1.112779647 | 0.00016174 |
| Cd55       | 1591.1387  | -3.161958067 | 1.95E-34   |
| Cd72       | 345.693651 | -1.290447215 | 5.36E-16   |
| Cd79a      | 145.856436 | -1.29241578  | 3.14E-07   |
| Cd79b      | 163.715979 | -1.440614408 | 3.98E-06   |
| Cd80       | 2590.50394 | 3.691775214  | 1.58E-65   |
| Cd81       | 499.49844  | 3.689005351  | 4.73E-85   |
| Cd83       | 344.333933 | 2.81546128   | 8.42E-26   |
| Cd84       | 3936.23734 | -1.078773061 | 7.27E-09   |
| Cd8b1      | 19630.6589 | -1.485155095 | 1.58E-20   |
| Cd96       | 8800.87229 | -1.085630519 | 3.06E-07   |
| Cdc20      | 2397.71782 | 1.319469753  | 0.00014941 |
| Cdc25a     | 2130.06191 | 1.440146816  | 2.75E-19   |
| Cdc25c     | 679.309868 | 1.247071131  | 3.07E-06   |
| Cdc34      | 2344.07825 | 1.116301987  | 4.04E-05   |
| Cdc42bpa   | 256.80737  | 1.850397693  | 8.26E-15   |
| Cdc42bpb   | 104.351282 | 1.17619662   | 1.60E-07   |
| Cdc42ep3   | 629.717485 | -1.136473622 | 2.61E-10   |
| Cdc42se2   | 6601.15379 | -1.193616699 | 4.21E-17   |
| Cdc45      | 2639.14223 | 1.508656213  | 2.97E-10   |
| Cdc6       | 2332.06412 | 1.774669736  | 2.48E-10   |
| Cdca2      | 2671.55791 | 1.201838875  | 5.60E-07   |
| Cdca3      | 1998.285   | 1.011820721  | 0.00121887 |
| Cdca5      | 1336.63989 | 1.337826583  | 1.59E-05   |
| Cdca7      | 2363.23505 | 1.349263236  | 8.76E-09   |
| Cdca8      | 2274.01765 | 1.385778744  | 4.04E-06   |
| Cdh1       | 104.57761  | -1.871055394 | 3.20E-06   |
| Cdh23      | 1807.45974 | -2.146694662 | 5.59E-44   |
| Cdk1       | 3682.23403 | 1.101094138  | 0.00030431 |
| Cdk2       | 1437.28217 | 1.09641365   | 1.07E-09   |
| Cdk2ap1    | 1380.30442 | 1.52844625   | 3.28E-18   |
| Cdk4       | 5500.68584 | 1.077508532  | 2.08E-05   |
| Cdkn1a     | 1071.03207 | 3.646493903  | 1.21E-21   |
| Cdkn1b     | 2652.17894 | -1.159440419 | 5.51E-10   |
| Cdr2       | 486.849992 | 1.083509594  | 4.24E-16   |
| Cdr2l      | 145.978083 | -1.212784052 | 2.08E-07   |
| Cdv3       | 6964.50746 | 1.211075478  | 2.97E-10   |
| Ceacam15   | 287.634118 | -1.697279137 | 7.37E-06   |
| Ceacam-ps1 | 408.788281 | -1.394143379 | 1.66E-13   |
| Cenpa      | 4318.20237 | 1.729662738  | 3.57E-13   |
| Cenpe      | 5469.67695 | 1.27919781   | 7.01E-06   |
| Cenph      | 874.789935 | 1.472566797  | 2.41E-11   |
| Cenpi      | 1631.22347 | 1.363257819  | 4.15E-06   |
| Cenpk      | 891.265698 | 1.243123373  | 0.00037919 |
| Cenpp      | 2767.86415 | 1.620916358  | 1.41E-07   |
| Cenpt      | 763.993925 | 1.004491487  | 5.77E-08   |
| Cenpu      | 626.917093 | 1.07007501   | 1.42E-07   |

|         |            |              |            |
|---------|------------|--------------|------------|
| Cenpv   | 436.636264 | 1.310900145  | 3.24E-17   |
| Cep290  | 460.30194  | 1.827059278  | 1.32E-15   |
| Cep55   | 1717.76677 | 1.382801993  | 2.34E-08   |
| Cep85l  | 908.190822 | 1.677073539  | 2.17E-12   |
| Cep97   | 4169.88445 | -1.217896753 | 2.74E-08   |
| Cercam  | 955.494175 | -1.133228023 | 1.09E-08   |
| Cers6   | 5033.37753 | 1.404119905  | 7.16E-10   |
| Cfap100 | 245.767172 | -1.234760946 | 1.51E-10   |
| Cfap54  | 801.597975 | 2.600289048  | 7.05E-37   |
| Cfap74  | 223.639298 | -1.32725912  | 2.24E-05   |
| Chac1   | 162.921237 | 2.388693507  | 2.80E-18   |
| Chaf1a  | 2910.51993 | 1.676263277  | 6.15E-13   |
| Chchd10 | 573.069835 | 2.546543476  | 3.41E-22   |
| Chchd4  | 639.732462 | 1.083027807  | 1.13E-21   |
| Chd3    | 10093.6848 | -2.122720424 | 2.99E-23   |
| Chd5    | 185.376773 | -1.241095996 | 1.06E-11   |
| Chek1   | 1204.49902 | 1.460965     | 3.71E-08   |
| Chil5   | 490.988668 | -1.527768136 | 0.00020977 |
| Chl1    | 1074.25315 | 5.274163274  | 2.32E-81   |
| Chn2    | 476.29021  | 2.268935081  | 6.19E-07   |
| Chrm4   | 128.865615 | 1.088760354  | 0.00011869 |
| Chrna2  | 241.066324 | -1.001195524 | 0.00010795 |
| Chrna9  | 228.850664 | -1.154028377 | 7.15E-06   |
| Chrnbl  | 335.039232 | -1.562414732 | 1.09E-10   |
| Chst10  | 1081.63371 | -1.359237642 | 4.66E-48   |
| Chst2   | 626.729778 | 2.182571593  | 4.05E-16   |
| Chst3   | 105.703385 | 1.562146405  | 1.04E-07   |
| Chtf18  | 883.521037 | 1.368912293  | 4.72E-07   |
| Cinp    | 1337.13224 | 1.442288295  | 1.99E-29   |
| Cit     | 5325.64471 | 1.172458196  | 3.96E-06   |
| Ckap4   | 130.87389  | 1.06013081   | 0.00064118 |
| Ckb     | 167.54996  | 1.385780407  | 3.69E-06   |
| Cks1b   | 1346.9777  | 1.34626614   | 5.92E-05   |
| Clcf1   | 1842.56086 | -1.442162163 | 6.13E-06   |
| Clec2d  | 6158.33604 | -1.391656537 | 6.53E-11   |
| Clec2i  | 735.733398 | -1.202228959 | 0.00016474 |
| Clic4   | 4692.53581 | 1.356274072  | 1.50E-10   |
| Clip2   | 399.295554 | 1.430526496  | 1.78E-14   |
| Clip3   | 113.813242 | 1.25542849   | 4.83E-05   |
| Clsn    | 3974.62115 | 1.136358133  | 4.88E-06   |
| Cluh    | 3820.6117  | 1.256203082  | 4.31E-11   |
| Cmah    | 13140.6816 | -2.157079294 | 5.44E-21   |
| Cnga1   | 269.896599 | -1.867790871 | 3.98E-16   |
| Cnih3   | 147.921243 | 2.087792948  | 9.64E-19   |
| Cnp     | 4837.30651 | -1.271202382 | 9.47E-07   |
| Cnr2    | 873.728852 | -2.369246008 | 6.38E-32   |
| Cobll1  | 2498.09647 | 1.88007347   | 4.98E-12   |
| Col20a1 | 340.795724 | -1.397176085 | 1.06E-08   |
| Col23a1 | 367.08163  | -1.522788482 | 4.67E-23   |
| Comt    | 1251.8547  | 1.057698069  | 1.98E-14   |

|               |            |              |            |
|---------------|------------|--------------|------------|
| Coq7          | 336.709325 | 1.05602284   | 5.54E-08   |
| Coq8a         | 507.485541 | -1.132917746 | 4.65E-12   |
| Corin         | 112.929842 | -1.185595772 | 2.31E-06   |
| Cpd           | 1122.16966 | 2.076385496  | 3.73E-25   |
| Cpq           | 1570.48694 | -1.494051009 | 0.0230701  |
| Cracr2a       | 6397.84069 | -1.794951344 | 1.01E-12   |
| Creb3l2       | 1446.9975  | 1.450582307  | 1.31E-20   |
| Crebl2        | 916.239018 | -1.359556631 | 2.57E-09   |
| Crebrf        | 3826.10399 | -1.920166432 | 6.89E-23   |
| Creld2        | 793.343853 | 1.352252892  | 1.75E-06   |
| Crip1         | 5822.31589 | -1.051995674 | 0.00520029 |
| Crlf3         | 8193.12518 | -1.170863921 | 6.33E-09   |
| Crybg3        | 1127.54319 | 1.147445216  | 1.45E-07   |
| Crygn         | 156.602734 | -1.214414123 | 3.86E-10   |
| Csf1          | 502.900786 | 3.151215218  | 6.35E-19   |
| Csf2          | 102.298928 | 1.349665021  | 3.84E-05   |
| Cst3          | 1442.95179 | 1.614196733  | 9.61E-07   |
| Cstad         | 369.013187 | -1.35815401  | 7.45E-05   |
| CT030173.1    | 399.878018 | 1.07522207   | 4.03E-06   |
| Ctc1          | 1645.65841 | 1.346441681  | 1.22E-13   |
| Cth           | 292.028216 | 3.416416877  | 2.63E-27   |
| Ctnna1        | 2745.73875 | 1.052539011  | 8.16E-05   |
| Ctnnd2        | 892.164444 | -2.290276391 | 3.52E-13   |
| Ctps          | 2630.57414 | 1.032266049  | 1.18E-17   |
| Ctso          | 1334.68081 | -1.336145465 | 9.22E-09   |
| Ctss          | 2281.21398 | -1.099103924 | 2.14E-11   |
| Ctsw          | 4631.52383 | -1.480878343 | 3.13E-13   |
| Ctsz          | 1631.76403 | 1.085834702  | 4.32E-08   |
| Ctxn1         | 137.014129 | -1.148863052 | 3.01E-09   |
| Cxcr3         | 933.967977 | -3.492581282 | 1.80E-33   |
| Cxcr5         | 334.465202 | -1.946148939 | 4.48E-16   |
| Cxxc5         | 523.232313 | 1.106675457  | 9.40E-21   |
| Cyb5a         | 3615.15176 | -1.149510352 | 8.40E-34   |
| Cyb5r1        | 502.642873 | 1.233946721  | 1.38E-07   |
| Cyc1          | 2244.79732 | 1.342449255  | 1.19E-07   |
| Cycs          | 2072.59972 | 1.465535404  | 5.89E-07   |
| Cyp20a1       | 937.465992 | 1.174215496  | 2.94E-19   |
| Cyp2t4        | 156.168888 | -1.226920316 | 2.26E-18   |
| Cyp3a13       | 96.5114614 | -1.356646224 | 1.31E-05   |
| Cyp4f13       | 911.126971 | -1.126786147 | 0.00649877 |
| Cyp4f17       | 886.28629  | -1.213643874 | 8.91E-05   |
| Cyp51         | 5129.50377 | 1.300081813  | 1.46E-11   |
| Cysltr2       | 459.479566 | -1.280697615 | 3.33E-06   |
| Cyth1         | 17858.0385 | -1.447514835 | 7.66E-09   |
| D630045J12Rik | 415.057538 | 3.244829987  | 7.52E-51   |
| D830025C05Rik | 139.696385 | -1.220305654 | 2.46E-06   |
| Daam2         | 160.417062 | -1.032960996 | 4.47E-09   |
| Dab2ip        | 143.41985  | 1.651985356  | 3.79E-11   |
| Dach2         | 229.287819 | 1.05129225   | 0.00120883 |
| Dand5         | 159.840455 | -1.440336877 | 2.89E-12   |

|         |            |              |            |
|---------|------------|--------------|------------|
| Dapk1   | 286.418946 | -1.366185355 | 1.51E-11   |
| Dapk2   | 1055.66911 | -3.375234677 | 3.08E-44   |
| Dbn1    | 156.219521 | -1.70765483  | 2.82E-07   |
| Dbp     | 434.311407 | -1.950150621 | 2.72E-25   |
| Dclk1   | 501.994156 | 4.242477349  | 2.84E-85   |
| Dclk2   | 1273.52358 | 1.086751123  | 2.63E-06   |
| Dclre1a | 446.418551 | 1.260088461  | 1.82E-21   |
| Dcp1b   | 970.118738 | -1.012835244 | 4.32E-05   |
| Dctpp1  | 898.036787 | 1.316348017  | 0.00016258 |
| Ddb1    | 12149.0898 | 1.066974598  | 2.04E-07   |
| Ddias   | 635.191365 | 1.805628731  | 1.45E-12   |
| Ddit4   | 2051.66343 | 1.051823284  | 0.00214191 |
| Ddn     | 127.629423 | 1.457463715  | 2.02E-11   |
| Ddx1    | 4459.86773 | 1.35605616   | 6.88E-24   |
| Ddx20   | 1257.69457 | 1.070000283  | 1.17E-10   |
| Ddx39   | 3827.36667 | 1.206061685  | 1.80E-10   |
| Ddx58   | 2927.0352  | -1.621891176 | 2.05E-31   |
| Ddx60   | 1285.99215 | -2.932583695 | 4.23E-18   |
| Degs2   | 229.142104 | -1.148292407 | 4.58E-10   |
| Dennd1c | 3159.14035 | -1.279023064 | 3.06E-06   |
| Depdc1b | 3487.3412  | -1.145048002 | 5.21E-07   |
| Dgka    | 14565.3734 | -1.473880079 | 5.55E-20   |
| Dgkg    | 327.464913 | 2.450456486  | 1.47E-15   |
| Dgkh    | 2980.8002  | 1.909647712  | 1.29E-13   |
| Dguok   | 1287.26449 | -1.035479061 | 3.24E-05   |
| Dhcr24  | 2520.919   | 1.085917928  | 8.86E-05   |
| Dhfr    | 2174.21132 | 1.459602589  | 3.72E-09   |
| Dhrs13  | 310.110236 | 1.34115411   | 2.28E-11   |
| Dhx29   | 1509.22328 | 1.210494279  | 9.42E-24   |
| Diaph3  | 10954.2705 | 1.049417576  | 0.00140323 |
| Dip2a   | 392.168795 | 1.284817735  | 9.35E-16   |
| Dirc2   | 2937.84383 | -2.04162885  | 1.80E-15   |
| Disc1   | 917.804574 | -1.124194307 | 3.15E-06   |
| Dlg2    | 2903.84932 | 4.759003026  | 6.00E-82   |
| Dlgap5  | 3415.53969 | 1.244482209  | 8.48E-08   |
| Dmwd    | 209.244495 | 2.674657672  | 3.37E-20   |
| Dmxi2   | 149.005506 | 2.12834685   | 7.76E-15   |
| Dna2    | 833.02917  | 1.375403455  | 4.41E-10   |
| Dnaaf1  | 138.868786 | -1.266379626 | 6.27E-11   |
| Dnah17  | 897.080266 | -1.742287372 | 6.26E-09   |
| Dnah8   | 6649.66539 | -2.094438164 | 1.98E-11   |
| Dnah9   | 316.683693 | -1.083725071 | 7.40E-09   |
| Dnajb13 | 601.825764 | -1.028701797 | 7.73E-14   |
| Dnajb5  | 620.474803 | 1.173690315  | 8.13E-11   |
| Dnajb9  | 759.651172 | -1.29952834  | 1.39E-05   |
| Dnajc12 | 154.442672 | 1.287328206  | 5.62E-08   |
| Dnajc27 | 706.116142 | 1.00871787   | 1.62E-06   |
| Dnal1   | 208.459513 | 1.010893782  | 7.24E-06   |
| Dnm1    | 157.125095 | -1.64845865  | 0.00012749 |
| Dnm3    | 193.442533 | 1.45349257   | 3.06E-08   |

|               |            |              |            |
|---------------|------------|--------------|------------|
| Dnmt1         | 14786.7115 | 1.120362608  | 9.19E-07   |
| Dntt          | 1003.51745 | -3.12541911  | 6.62E-59   |
| Dock2         | 54792.0722 | -1.030425844 | 3.03E-08   |
| Dock3         | 119.19422  | 1.335326146  | 3.93E-09   |
| Dock8         | 19702.6262 | -1.066530811 | 5.93E-14   |
| Dpagt1        | 512.357644 | 1.035958874  | 2.67E-10   |
| Dph5          | 3291.96343 | -1.06697846  | 2.06E-05   |
| Dpp4          | 5212.70032 | -1.772839903 | 2.10E-20   |
| Drc1          | 2666.43192 | -3.901187495 | 1.29E-50   |
| Dscc1         | 617.335572 | 1.035879415  | 1.95E-06   |
| Dsn1          | 900.204967 | 1.118069713  | 2.47E-11   |
| Dtl           | 4471.65508 | 1.529051282  | 2.10E-08   |
| Dtx1          | 777.920057 | -4.455203884 | 1.50E-59   |
| Dtx3l         | 5886.01106 | -1.11102901  | 1.03E-15   |
| Dus2          | 981.49594  | 1.176550385  | 8.51E-10   |
| Dusp1         | 1284.39039 | -1.252372662 | 0.03201907 |
| Dusp10        | 2362.83237 | -1.082350457 | 2.43E-12   |
| Dusp14        | 373.575151 | 2.269978555  | 7.52E-19   |
| Dusp3         | 203.92816  | 1.017911985  | 0.00018701 |
| Dusp4         | 2281.79618 | 3.273827825  | 1.23E-23   |
| Dut           | 4443.68312 | 1.482576673  | 2.43E-10   |
| Dyrk2         | 3692.83278 | -1.69660029  | 1.26E-20   |
| Dyrk3         | 312.637492 | 1.639521611  | 4.38E-08   |
| Dyrk4         | 332.457554 | -1.691846602 | 9.40E-21   |
| Dzip1         | 1142.52138 | -2.198191025 | 2.92E-13   |
| E030030I06Rik | 148.716936 | -1.436431688 | 1.94E-07   |
| E130102H24Rik | 261.648524 | -1.544413517 | 1.19E-06   |
| E130307A14Rik | 2567.32393 | -1.023805839 | 0.00452909 |
| E130308A19Rik | 1668.24359 | 1.568537222  | 1.09E-12   |
| E230001N04Rik | 162.40683  | -1.096565931 | 1.46E-07   |
| E230032D23Rik | 166.565656 | -1.236018778 | 2.96E-05   |
| E2f1          | 1237.07673 | 1.137712285  | 2.58E-07   |
| E2f3          | 5366.08764 | 1.161637835  | 1.19E-06   |
| Ebf1          | 346.564237 | 3.52785602   | 7.07E-35   |
| Ebna1bp2      | 2732.41196 | 1.203010307  | 5.82E-10   |
| Echdc2        | 198.772415 | -1.247470668 | 2.89E-10   |
| Ect2          | 3316.76141 | 1.01884965   | 0.00066339 |
| Eea1          | 4247.8851  | 1.900247934  | 1.16E-14   |
| Eef1g         | 23167.9281 | 1.034987592  | 4.98E-06   |
| Eepd1         | 139.771199 | -1.021429984 | 4.44E-08   |
| Efcab5        | 177.320546 | 1.052807735  | 5.21E-07   |
| Eftud2        | 4326.92386 | 1.139302606  | 3.30E-08   |
| Egln3         | 1818.40373 | 1.548536487  | 6.21E-05   |
| Egr1          | 1915.03548 | 1.70420106   | 1.01E-09   |
| Egr2          | 467.059029 | 1.336693776  | 9.25E-06   |
| Egr3          | 1252.07719 | 1.936473022  | 4.06E-08   |
| Ehbp1         | 502.568837 | 1.384755614  | 9.77E-08   |
| Ehd2          | 198.473057 | 1.941984558  | 3.07E-10   |
| Ehd3          | 2112.63639 | -1.050237481 | 1.04E-09   |
| Ehd4          | 1780.79471 | 1.817831557  | 2.01E-12   |

|          |            |              |            |
|----------|------------|--------------|------------|
| Eif1ax   | 2483.14209 | 1.25670145   | 1.58E-09   |
| Eif2d    | 2206.87914 | 1.029120533  | 1.12E-17   |
| Eif3b    | 10170.3388 | 1.249146377  | 1.90E-08   |
| Eif3c    | 12777.3728 | 1.121079392  | 5.52E-10   |
| Eif4e    | 3671.12276 | 1.016333465  | 1.93E-11   |
| Eif4ebp1 | 833.161772 | 1.922956393  | 7.08E-14   |
| Eif4g1   | 16190.6389 | 1.041076196  | 2.27E-08   |
| Eif5a    | 21216.1845 | 1.221085588  | 1.87E-05   |
| Eif6     | 2572.90452 | 1.098649533  | 2.96E-05   |
| Elk3     | 2746.81602 | 1.132381433  | 4.70E-05   |
| ElI2     | 717.506455 | 2.12803776   | 1.12E-12   |
| Elovl7   | 804.25286  | -2.971659377 | 2.48E-30   |
| Emb      | 12354.526  | -1.070668121 | 7.53E-12   |
| Emc9     | 345.319568 | -1.2709493   | 1.02E-09   |
| Eme1     | 738.136608 | 1.107866554  | 3.72E-09   |
| Eml1     | 171.811258 | 2.171623077  | 4.51E-21   |
| Emp1     | 772.549033 | 1.101889522  | 0.01515517 |
| Emp3     | 2382.77603 | -1.072418548 | 3.00E-06   |
| Endod1   | 1658.67584 | 1.850722013  | 1.20E-15   |
| Enkd1    | 407.424135 | 1.651409818  | 4.94E-12   |
| Eno1     | 36285.0513 | 1.3406243    | 0.00035351 |
| Eno2     | 122.154621 | 1.464526983  | 3.20E-07   |
| Eno3     | 1918.30202 | 2.763774572  | 1.38E-51   |
| Enox1    | 125.867997 | 1.203596304  | 1.17E-08   |
| Enpp4    | 818.766633 | -1.346175831 | 2.26E-09   |
| Enpp5    | 147.241725 | -1.321074161 | 8.45E-13   |
| Entpd5   | 3260.12192 | -1.424142808 | 1.25E-28   |
| Eomes    | 848.191548 | -2.009484184 | 6.12E-10   |
| Epb41l5  | 182.45683  | 1.113208869  | 1.21E-06   |
| Epcam    | 148.310817 | 1.134146491  | 4.64E-06   |
| Epha1    | 382.382019 | -1.718408231 | 1.06E-19   |
| Ephb2    | 113.31943  | -1.07454524  | 7.34E-05   |
| Eprs     | 10446.5689 | 1.190932061  | 3.09E-20   |
| Epsti1   | 16956.8294 | -1.533338473 | 3.57E-13   |
| Erc1     | 1671.13492 | 1.43638313   | 1.45E-12   |
| Ercc6l   | 1076.0687  | 1.019436309  | 0.00066015 |
| Erg      | 967.644318 | 1.074704584  | 1.57E-05   |
| Ergic1   | 2401.93921 | 1.236155468  | 1.79E-16   |
| Ero1l    | 3382.04627 | 1.121712091  | 5.75E-10   |
| Erp27    | 439.482632 | -1.489614073 | 1.12E-17   |
| Espl1    | 3009.53671 | 1.417308364  | 7.95E-07   |
| Espn     | 314.860862 | -1.034079696 | 3.93E-06   |
| Esr1     | 1592.36008 | -2.058472891 | 6.88E-10   |
| Esrp2    | 307.581537 | -1.165529101 | 8.10E-14   |
| Etfbkmt  | 1070.68163 | -1.786733685 | 1.97E-16   |
| Etv4     | 309.737547 | 2.147459932  | 3.16E-20   |
| Etv5     | 284.246857 | 2.674117726  | 4.12E-56   |
| Evi5     | 541.975234 | 1.12366824   | 1.54E-06   |
| Exo1     | 2043.80475 | 1.702143375  | 5.02E-12   |
| ExpH5    | 686.936508 | 4.680736905  | 3.51E-75   |

|               |            |              |            |
|---------------|------------|--------------|------------|
| Eya2          | 1584.02552 | -1.874960491 | 3.78E-08   |
| Ezh2          | 7904.69017 | 1.077829888  | 2.47E-08   |
| F2r           | 2512.28115 | -1.825528659 | 8.07E-15   |
| F2rl1         | 775.917681 | -1.608113948 | 7.06E-26   |
| F730043M19Rik | 221.369576 | 1.390317347  | 1.87E-07   |
| F730311O21Rik | 127.746185 | -1.733254662 | 3.00E-09   |
| F830016B08Rik | 232.463162 | -3.235129461 | 2.35E-22   |
| Faap24        | 467.20401  | 1.142896652  | 9.95E-09   |
| Fabp5         | 1068.05813 | 1.797497724  | 4.14E-12   |
| Fads2         | 1329.43147 | 2.515658544  | 2.17E-10   |
| Fads3         | 143.263538 | 1.03180342   | 9.96E-05   |
| Fah           | 265.523893 | 1.19634261   | 2.35E-12   |
| Fam102a       | 9349.60845 | -1.250815299 | 1.22E-12   |
| Fam105a       | 3302.36881 | -1.124065303 | 7.64E-08   |
| Fam117a       | 3383.76933 | -2.427587612 | 1.41E-11   |
| Fam129b       | 316.493707 | 1.423987296  | 1.58E-06   |
| Fam129c       | 150.171583 | -1.11125465  | 2.63E-09   |
| Fam135b       | 159.364323 | -1.106547142 | 7.70E-07   |
| Fam136a       | 868.568804 | 1.067266308  | 2.51E-08   |
| Fam162a       | 2858.69302 | 1.242202813  | 7.33E-16   |
| Fam169b       | 13622.6249 | -1.208280039 | 9.25E-07   |
| Fam178b       | 90.3161747 | 1.068604229  | 4.36E-06   |
| Fam186b       | 96.1507495 | -1.200125204 | 9.39E-06   |
| Fam189b       | 2178.16849 | -1.834186532 | 4.06E-21   |
| Fam19a3       | 147.042013 | -1.440566556 | 2.03E-11   |
| Fam20a        | 2306.61986 | 2.550565526  | 4.31E-30   |
| Fam210b       | 390.275452 | -1.242182718 | 7.54E-11   |
| Fam213a       | 440.177664 | 2.615557753  | 1.34E-56   |
| Fam214a       | 2941.96505 | -1.55117013  | 4.23E-14   |
| Fam222a       | 211.124467 | -1.350092923 | 5.10E-11   |
| Fam228a       | 231.394045 | 1.439333321  | 3.05E-12   |
| Fam26f        | 287.285264 | -1.693003195 | 4.00E-10   |
| Fam49a        | 2372.71367 | -2.013004192 | 9.28E-14   |
| Fam69a        | 2695.28748 | -1.244152117 | 4.08E-05   |
| Fam78a        | 7713.47106 | -1.953202735 | 4.10E-22   |
| Fam78b        | 285.155831 | -1.020367904 | 0.00011255 |
| Fam81a        | 153.001374 | 1.450167804  | 3.30E-09   |
| Fam83f        | 443.949497 | -2.553474002 | 1.85E-28   |
| Fam89a        | 523.255944 | -2.135994123 | 1.49E-13   |
| Fancd2        | 2307.23796 | 1.711529386  | 1.43E-14   |
| Fancf         | 270.598575 | 1.065820561  | 1.67E-07   |
| Fancm         | 1824.81217 | 1.187091722  | 5.03E-12   |
| Farp1         | 5507.18021 | 2.270169979  | 6.20E-31   |
| Fas           | 830.429418 | -1.990689054 | 7.84E-31   |
| Fasl          | 764.422303 | 1.492325685  | 0.0001212  |
| Faxc          | 86.8161289 | 1.026552141  | 5.62E-08   |
| Fbxl12        | 859.010108 | -1.17753175  | 4.98E-08   |
| Fbxl22        | 880.895302 | -1.673938695 | 4.98E-19   |
| Fbxo32        | 1092.53048 | -1.808095605 | 3.00E-38   |
| Fbxw4         | 2409.62071 | -1.160758324 | 0.00121237 |

|               |            |              |            |
|---------------|------------|--------------|------------|
| Fbxw9         | 205.11405  | 1.137344019  | 1.24E-07   |
| Fcgrt         | 393.590626 | -3.316366565 | 5.83E-59   |
| Fen1          | 339.275671 | 1.187767465  | 3.86E-06   |
| Fgd2          | 110.635456 | -1.009043086 | 8.14E-05   |
| Fgd3          | 3741.94236 | -1.047192978 | 2.03E-10   |
| Fgf13         | 13997.4803 | -2.180882961 | 8.81E-05   |
| Fgfr1         | 169.253427 | -1.761792501 | 1.02E-19   |
| Fhl3          | 1209.02273 | 1.034181828  | 7.17E-07   |
| Figl1         | 2359.50634 | 1.594854328  | 1.43E-09   |
| Filip1        | 366.535082 | 2.03304867   | 1.13E-08   |
| Fkbp1a        | 7326.87775 | 1.044588958  | 6.40E-15   |
| Fkbp4         | 4752.56187 | 1.242865175  | 5.33E-06   |
| Flnb          | 7850.77388 | 1.051744236  | 1.45E-09   |
| Fmnl3         | 1637.72348 | 1.804299903  | 1.04E-22   |
| Fmo5          | 256.147089 | -1.177417082 | 9.88E-12   |
| Fn3k          | 117.183302 | -2.271321915 | 2.21E-14   |
| Fndc3b        | 568.180728 | 1.37028765   | 7.12E-13   |
| Fnip2         | 658.691226 | 2.061877083  | 6.16E-19   |
| Fntb          | 3435.41825 | -1.307209425 | 2.47E-07   |
| Fos           | 1993.11415 | -2.058575776 | 1.94E-06   |
| Fosb          | 4279.98593 | -2.217275892 | 3.73E-07   |
| Foxp1         | 54784.4855 | -1.126041822 | 0.0001124  |
| Frat1         | 564.198303 | -1.469048842 | 1.11E-08   |
| Frat2         | 690.255562 | -2.160565104 | 3.82E-18   |
| Frmd4b        | 466.219685 | 1.063337614  | 0.00298653 |
| Frmd5         | 266.568225 | 1.353370723  | 1.23E-13   |
| Fry           | 5738.69941 | -2.681253181 | 1.67E-26   |
| Fsd1l         | 509.28572  | -1.167072675 | 7.70E-05   |
| Fsd2          | 232.722243 | -1.169249007 | 9.23E-20   |
| Ftsj3         | 3551.24154 | 1.108995719  | 1.15E-11   |
| Fut4          | 291.106441 | 1.994734811  | 8.89E-11   |
| Fxyd7         | 151.712329 | -1.473305489 | 2.49E-15   |
| Fyb           | 5527.74212 | -1.326482948 | 1.37E-08   |
| G530012D18Rik | 99.3757681 | -1.06090688  | 2.03E-07   |
| Gab2          | 702.401525 | 1.684708199  | 4.90E-09   |
| Gab3          | 4727.53214 | -2.184718559 | 1.19E-10   |
| Gabbr1        | 1877.88877 | -1.322624942 | 9.91E-05   |
| Gabbr2        | 143.344002 | -1.371156354 | 1.83E-05   |
| Galc          | 575.732533 | 1.514918784  | 1.87E-14   |
| Gale          | 518.287356 | 1.260736512  | 8.25E-08   |
| Galm          | 259.501775 | 1.173610054  | 1.23E-13   |
| Galnt10       | 3329.58615 | -2.169096656 | 2.44E-34   |
| Galnt3        | 2011.30174 | 3.001825973  | 1.86E-19   |
| Gapdh         | 44424.3551 | 1.27399437   | 0.00080976 |
| Gar1          | 1364.66873 | 1.177581334  | 3.00E-18   |
| Gars          | 7482.63782 | 1.078363784  | 3.90E-15   |
| Gas2          | 1733.36146 | 1.976668223  | 4.65E-14   |
| Gas2l1        | 105.469564 | 1.141947837  | 0.00028216 |
| Gas7          | 196.030955 | -1.631562145 | 7.12E-09   |
| Gata1         | 285.45028  | -2.853830298 | 4.65E-24   |



|         |            |              |            |
|---------|------------|--------------|------------|
| Gatm    | 142.962426 | 1.666442962  | 5.89E-11   |
| Gatsl3  | 181.851551 | -1.424106688 | 2.88E-11   |
| Gbp11   | 546.825255 | -2.428872265 | 3.17E-26   |
| Gbp2    | 3991.50055 | -2.189513276 | 1.05E-24   |
| Gbp8    | 2570.4947  | -1.834898318 | 6.18E-12   |
| Gcat    | 671.630602 | 1.885416565  | 2.67E-09   |
| Gcnt1   | 332.827014 | 2.807107399  | 9.41E-26   |
| Gcnt2   | 105.76327  | -1.174702716 | 3.65E-08   |
| Gcnt4   | 186.482892 | 1.515664694  | 1.20E-07   |
| Gdpd1   | 155.531336 | 1.227846498  | 6.74E-13   |
| Gdpd5   | 414.589966 | 1.312844019  | 3.34E-11   |
| Gemin6  | 334.70011  | 1.35986011   | 6.23E-06   |
| Gen1    | 1258.59564 | 1.144373439  | 1.82E-07   |
| Gfra1   | 122.244197 | 1.788150057  | 5.64E-16   |
| Ggact   | 1807.6013  | -1.028658576 | 1.07E-05   |
| Ggt1    | 886.878537 | -3.696667408 | 5.26E-57   |
| Ggt5    | 204.092081 | -1.571558871 | 1.43E-09   |
| Gimap3  | 12363.7779 | -1.231468025 | 3.86E-15   |
| Gimap6  | 9926.40664 | -1.148391981 | 8.53E-14   |
| Gins1   | 876.705183 | 1.344780057  | 1.17E-07   |
| Gipc2   | 100.976305 | 1.401310314  | 9.34E-10   |
| Gja1    | 99.4049431 | 1.495749147  | 3.29E-08   |
| Gldc    | 303.781304 | 1.534210083  | 4.90E-06   |
| Glipr2  | 7240.74466 | -1.491352791 | 1.61E-13   |
| Glis3   | 166.613222 | -1.482615637 | 4.55E-10   |
| Gls2    | 271.561521 | 1.627858227  | 1.32E-16   |
| Gm10388 | 90.6637363 | -1.007554097 | 0.00020074 |
| Gm1043  | 946.716506 | -3.191750126 | 3.88E-39   |
| Gm10521 | 241.635153 | -1.19280495  | 5.99E-06   |
| Gm10548 | 225.550377 | -1.028378598 | 2.64E-06   |
| Gm10640 | 362.438911 | -1.969720105 | 1.65E-34   |
| Gm10676 | 129.86328  | -1.151327361 | 1.99E-10   |
| Gm11077 | 122.703266 | -1.622507437 | 2.04E-06   |
| Gm11131 | 299.907593 | -1.355658049 | 4.99E-14   |
| Gm11210 | 477.971917 | -1.304697577 | 4.44E-08   |
| Gm11427 | 1686.49559 | 1.084839247  | 0.00322676 |
| Gm11476 | 879.616923 | -1.196211225 | 0.00115917 |
| Gm11541 | 83.7252513 | -1.154805482 | 5.04E-06   |
| Gm11579 | 227.564234 | 1.107629433  | 5.94E-07   |
| Gm11613 | 680.472954 | -2.043608655 | 2.19E-06   |
| Gm11696 | 338.263514 | -1.397610871 | 3.76E-16   |
| Gm11725 | 138.667453 | -1.996665368 | 1.96E-12   |
| Gm12185 | 2043.51658 | -1.844124932 | 6.13E-27   |
| Gm12216 | 2576.87573 | -2.551785094 | 9.55E-17   |
| Gm12250 | 1421.4886  | -1.263951656 | 5.33E-10   |
| Gm12319 | 285.482229 | -1.162111302 | 7.22E-10   |
| Gm12474 | 651.712572 | -1.76000012  | 9.47E-09   |
| Gm12703 | 192.193038 | -1.490258036 | 0.01487712 |
| Gm12764 | 115.153491 | -1.387247485 | 3.54E-10   |
| Gm128   | 406.039121 | -1.745758765 | 5.43E-29   |

|         |            |              |            |
|---------|------------|--------------|------------|
| Gm13067 | 105.094121 | 1.174517628  | 1.89E-09   |
| Gm13710 | 323.501938 | -1.979250156 | 1.99E-07   |
| Gm13807 | 864.974897 | -1.261083169 | 4.31E-07   |
| Gm14025 | 124.520148 | -1.078035552 | 8.25E-06   |
| Gm14027 | 135.695551 | -1.251923687 | 0.00015513 |
| Gm14029 | 334.994185 | -1.323552209 | 1.91E-10   |
| Gm14085 | 10210.9835 | -4.809128428 | 6.71E-50   |
| Gm14168 | 174.102804 | -1.064283215 | 7.33E-10   |
| Gm14965 | 142.746187 | -1.933328701 | 2.12E-18   |
| Gm14966 | 591.0745   | -1.343620302 | 3.15E-06   |
| Gm15283 | 221.716176 | 1.941622574  | 7.74E-22   |
| Gm15337 | 213.963167 | -1.167582572 | 4.59E-08   |
| Gm15440 | 1117.15289 | -1.436186834 | 5.97E-16   |
| Gm15441 | 167.153208 | -1.042775238 | 0.00052449 |
| Gm15473 | 182.47453  | 1.181400139  | 8.69E-06   |
| Gm156   | 852.845436 | 5.144581     | 1.57E-87   |
| Gm15601 | 279.698153 | -1.005309534 | 2.12E-08   |
| Gm15674 | 146.568652 | -1.707028179 | 9.73E-09   |
| Gm15943 | 148.228183 | -1.174347848 | 1.09E-08   |
| Gm16083 | 305.678969 | -2.182924544 | 7.05E-15   |
| Gm16086 | 107.000576 | -1.40097641  | 5.89E-08   |
| Gm16124 | 324.217499 | -1.560867161 | 3.02E-06   |
| Gm16157 | 169.788028 | -1.086334754 | 5.95E-06   |
| Gm16201 | 350.428655 | -1.579339614 | 1.36E-12   |
| Gm16242 | 671.73353  | 4.58800195   | 3.73E-80   |
| Gm16341 | 173.592806 | -1.668869056 | 3.88E-06   |
| Gm1647  | 91.6159652 | -1.097609356 | 4.18E-06   |
| Gm16576 | 582.293519 | -1.219129948 | 5.95E-06   |
| Gm17021 | 192.975888 | -1.010153242 | 1.88E-07   |
| Gm1720  | 109.360051 | -1.186895724 | 7.44E-08   |
| Gm17745 | 187.971768 | 1.741587345  | 4.81E-10   |
| Gm18752 | 122.321483 | -1.640083107 | 3.16E-08   |
| Gm1966  | 9528.06172 | -2.075467701 | 5.45E-34   |
| Gm19705 | 383.73796  | -2.312865846 | 1.27E-41   |
| Gm19931 | 88.3714777 | -1.079934737 | 1.06E-05   |
| Gm20219 | 129.038082 | -1.426965503 | 8.06E-09   |
| Gm20458 | 102.747646 | -1.164357465 | 8.51E-07   |
| Gm20489 | 156.764065 | -1.384318235 | 3.97E-17   |
| Gm20532 | 163.215782 | -1.629800044 | 4.99E-14   |
| Gm20559 | 2148.01897 | -2.851257244 | 1.16E-39   |
| Gm20560 | 83.7280206 | -1.299382447 | 1.27E-05   |
| Gm20661 | 109.755011 | -1.19943841  | 4.40E-09   |
| Gm21987 | 229.035272 | 1.519243232  | 1.82E-08   |
| Gm22513 | 3674.15558 | -1.622781511 | 0.00640809 |
| Gm23973 | 192.6385   | -1.114131778 | 0.00097968 |
| Gm24146 | 657.610949 | -1.448380357 | 0.00020279 |
| Gm24265 | 232.461357 | -1.124459318 | 0.01663735 |
| Gm24447 | 4763.32704 | -1.542607303 | 7.50E-05   |
| Gm25360 | 253.48753  | 1.11745154   | 0.00446312 |
| Gm26035 | 1263.37814 | -1.565491654 | 5.43E-05   |

|         |            |              |            |
|---------|------------|--------------|------------|
| Gm26583 | 266.396696 | -2.746884751 | 8.52E-37   |
| Gm26759 | 549.729306 | -1.113095762 | 0.00032081 |
| Gm26771 | 1175.35152 | -1.558740455 | 1.61E-05   |
| Gm26779 | 324.350626 | -1.083842673 | 0.00018163 |
| Gm26799 | 419.905008 | -1.686175936 | 1.64E-22   |
| Gm26809 | 344.911037 | -1.24363695  | 9.40E-12   |
| Gm26839 | 307.84654  | 1.106147715  | 7.92E-06   |
| Gm26848 | 741.379413 | -1.094474531 | 7.83E-07   |
| Gm26885 | 192.800247 | -1.262538325 | 0.00017622 |
| Gm26887 | 264.378416 | -1.009375337 | 0.02496413 |
| Gm26908 | 624.331467 | -1.626487476 | 1.38E-15   |
| Gm26981 | 197.431216 | -1.158869199 | 0.00174004 |
| Gm27008 | 2259.42591 | -1.332826158 | 3.47E-09   |
| Gm27184 | 106.394215 | -1.208958502 | 1.90E-07   |
| Gm28035 | 169.317181 | -1.294482578 | 1.38E-14   |
| Gm28052 | 190.734137 | -1.041027932 | 1.51E-10   |
| Gm28068 | 115.971251 | -1.10414268  | 2.64E-05   |
| Gm28802 | 477.846758 | -1.036202694 | 0.00043918 |
| Gm28935 | 162.519684 | -1.435726234 | 5.88E-13   |
| Gm28981 | 113.179189 | 1.623896107  | 5.16E-09   |
| Gm29243 | 182.058848 | -1.423896803 | 4.47E-13   |
| Gm29477 | 92.2002776 | -1.079393092 | 3.05E-07   |
| Gm29642 | 204.621304 | -1.087147194 | 7.53E-05   |
| Gm29811 | 173.94178  | -1.176812117 | 2.02E-07   |
| Gm30214 | 111.710825 | 1.751292486  | 1.02E-12   |
| Gm30275 | 1279.97777 | -1.541142499 | 3.09E-10   |
| Gm30948 | 1377.8489  | -4.818947023 | 5.63E-18   |
| Gm32633 | 654.987124 | -2.432784766 | 2.51E-12   |
| Gm33994 | 160.272207 | -1.411644015 | 1.16E-05   |
| Gm34086 | 213.263539 | -1.07449535  | 0.00049797 |
| Gm35037 | 175.796799 | -1.863258277 | 3.74E-14   |
| Gm35572 | 102.32096  | -1.089273687 | 3.70E-05   |
| Gm35585 | 205.441125 | -2.02596599  | 1.25E-16   |
| Gm36551 | 113.499771 | -1.356835183 | 2.71E-05   |
| Gm36999 | 145.931318 | -1.837089131 | 3.17E-11   |
| Gm37004 | 435.919292 | 1.475712861  | 5.88E-05   |
| Gm37068 | 336.044338 | -2.875041197 | 4.21E-11   |
| Gm37169 | 468.182633 | -1.341811369 | 8.04E-08   |
| Gm37387 | 607.059668 | -2.06497801  | 7.95E-18   |
| Gm37584 | 85.9307112 | -1.072928827 | 0.00014647 |
| Gm37699 | 289.076945 | -1.082793407 | 1.65E-05   |
| Gm38155 | 137.479802 | -1.560134592 | 1.55E-14   |
| Gm38244 | 776.008364 | -1.961216193 | 1.59E-05   |
| Gm38392 | 101.657781 | -1.08352894  | 0.00196859 |
| Gm42141 | 373.801295 | -1.452741623 | 2.66E-10   |
| Gm42372 | 211.458042 | -1.062992985 | 2.73E-08   |
| Gm42646 | 111.569421 | -1.040714573 | 7.12E-07   |
| Gm42809 | 114.987885 | -1.059246581 | 8.05E-08   |
| Gm43004 | 105.994855 | -1.296375481 | 2.83E-08   |
| Gm43196 | 131.162672 | -1.593019829 | 4.05E-09   |

|         |            |              |            |
|---------|------------|--------------|------------|
| Gm43302 | 188.021531 | -1.188811471 | 4.92E-08   |
| Gm43434 | 2015.29892 | -1.347722283 | 1.29E-05   |
| Gm43551 | 93.0755301 | -1.231798083 | 2.16E-09   |
| Gm43647 | 894.465114 | -2.662523741 | 6.93E-25   |
| Gm43698 | 228.064717 | -1.660389623 | 2.09E-15   |
| Gm43769 | 273.460803 | -1.375276135 | 5.69E-09   |
| Gm44110 | 114.1505   | -1.014177207 | 1.52E-08   |
| Gm44141 | 106.789033 | -1.192661314 | 7.48E-07   |
| Gm44148 | 138.877493 | -1.321650629 | 9.70E-06   |
| Gm44174 | 9107.43307 | -1.894546387 | 8.95E-08   |
| Gm44710 | 631.412913 | -1.608298569 | 0.00022444 |
| Gm44751 | 172.568868 | -1.034759744 | 8.61E-08   |
| Gm44899 | 286.408531 | -1.171188456 | 0.00125034 |
| Gm45418 | 82.0341131 | -1.100114641 | 2.39E-06   |
| Gm45552 | 328.504595 | -2.450906546 | 8.83E-40   |
| Gm45606 | 187.227707 | -1.196710741 | 1.42E-06   |
| Gm45837 | 216.268828 | -1.202399687 | 4.49E-11   |
| Gm4759  | 4839.59648 | -2.258210333 | 5.25E-31   |
| Gm4841  | 107.99869  | -1.813993902 | 3.33E-21   |
| Gm4881  | 272.616744 | -1.562948824 | 1.02E-12   |
| Gm4951  | 657.649251 | -3.817482915 | 3.31E-26   |
| Gm5432  | 244.532414 | -1.114817619 | 0.00206354 |
| Gm5511  | 192.564139 | -1.466799757 | 1.15E-10   |
| Gm5538  | 128.243619 | -2.440343549 | 3.04E-23   |
| Gm5547  | 236.612287 | -1.426404561 | 8.73E-15   |
| Gm6034  | 209.694962 | -1.798631514 | 9.24E-15   |
| Gm6657  | 98.0874649 | -1.151080387 | 4.78E-07   |
| Gm6904  | 296.474275 | -1.300849428 | 7.45E-06   |
| Gm7457  | 122.234368 | -1.368602071 | 1.42E-06   |
| Gm7967  | 183.826546 | -1.33346929  | 3.00E-06   |
| Gm8013  | 111.079697 | 1.016847566  | 0.00019259 |
| Gm8189  | 1341.3669  | -1.194140638 | 1.52E-05   |
| Gm9574  | 98.9308869 | -1.292977347 | 1.72E-09   |
| Gm9725  | 194.33007  | -1.068124198 | 8.41E-08   |
| Gm9800  | 555.056356 | 1.016215998  | 0.00034773 |
| Gm9889  | 94.3503569 | -1.321735855 | 4.45E-07   |
| Gmnds   | 7466.76144 | 1.004579839  | 0.00305756 |
| Gmnn    | 1734.62637 | 1.193174528  | 3.01E-06   |
| Gna15   | 436.77569  | -1.275009711 | 5.26E-08   |
| Gnaq    | 4002.91859 | 1.292126248  | 1.19E-06   |
| Gngt2   | 195.711084 | -1.759842439 | 3.94E-13   |
| Gnl1    | 1743.63042 | 1.063331736  | 1.66E-06   |
| Gnptab  | 8035.26282 | 1.601017239  | 4.83E-31   |
| Golm1   | 2594.30056 | -1.950982328 | 5.10E-35   |
| Got2    | 4356.72221 | 1.064278129  | 4.76E-07   |
| Gp1ba   | 200.770357 | -1.298404601 | 8.81E-09   |
| Gpaa1   | 931.7881   | 1.24898722   | 9.72E-07   |
| Gpc5    | 160.304635 | -1.392420057 | 2.89E-05   |
| Gpd2    | 5152.95043 | 2.801395169  | 7.00E-61   |
| Gpm6b   | 733.686775 | 1.835373228  | 5.88E-10   |

|            |            |              |            |
|------------|------------|--------------|------------|
| Gpr137b-ps | 453.709864 | -1.694735083 | 5.81E-37   |
| Gpr141     | 177.081145 | 1.803817434  | 5.69E-12   |
| Gpr15      | 324.276394 | -3.479049322 | 3.70E-27   |
| Gpr162     | 129.364371 | 1.822800083  | 3.23E-17   |
| Gpr55      | 526.663645 | -3.734767415 | 1.37E-52   |
| Gprc5b     | 119.747883 | -1.601684021 | 2.09E-09   |
| Gps1       | 1473.89312 | 1.100433683  | 2.72E-09   |
| Gpt2       | 397.232179 | 2.848228113  | 4.99E-14   |
| Gpx3       | 324.815333 | -1.289855061 | 4.21E-09   |
| Gramd3     | 14921.0238 | -2.894295741 | 8.25E-49   |
| Gramd4     | 8990.47809 | -1.824250375 | 2.85E-13   |
| Grap2      | 14051.6531 | -1.513508906 | 1.22E-18   |
| Grasp      | 394.815936 | -1.048543334 | 2.04E-08   |
| Grb10      | 230.578575 | 3.009891979  | 5.63E-28   |
| Gria3      | 631.80228  | -1.94845097  | 3.05E-07   |
| Grin2d     | 107.074976 | -1.007682632 | 2.75E-07   |
| Grtp1      | 211.698031 | -1.268267707 | 1.59E-15   |
| Grwd1      | 1151.89745 | 1.097762656  | 1.34E-06   |
| Gsap       | 2023.04807 | -1.202402284 | 7.23E-06   |
| Gsn        | 1206.92009 | -1.925199522 | 5.42E-08   |
| Gspt1      | 4591.43619 | 1.051472188  | 1.72E-21   |
| Gstt1      | 259.151646 | 2.493279255  | 1.30E-45   |
| Gtf2f1     | 2491.57988 | 1.007154365  | 1.14E-06   |
| Gtf2h4     | 638.189989 | 1.329184835  | 4.95E-10   |
| Gtf2ird1   | 1220.11186 | 1.706428621  | 3.37E-11   |
| Gtf2ird2   | 1322.61224 | -1.166097171 | 7.70E-11   |
| Gtse1      | 1526.78164 | 1.85546532   | 1.35E-11   |
| Gucy1a3    | 4725.14567 | 2.430746415  | 1.18E-13   |
| Gucy1b3    | 597.389086 | 1.441772767  | 7.53E-06   |
| Gusb       | 2248.51038 | 1.113464216  | 1.67E-13   |
| Gvin1      | 1944.72432 | -1.141789362 | 4.23E-05   |
| Gzma       | 169.313963 | -1.639794613 | 5.86E-05   |
| Gzmb       | 34911.9027 | 3.636288092  | 4.47E-16   |
| Gzmc       | 896.817857 | 3.596046039  | 2.80E-08   |
| H1f0       | 1079.49748 | 1.67237144   | 9.21E-05   |
| H2-Ab1     | 471.349084 | 2.132532841  | 0.00012517 |
| H2-DMA     | 1112.61805 | -1.655698994 | 1.90E-15   |
| H2-Ob      | 237.295308 | -1.685270151 | 1.32E-12   |
| H2-Q7      | 5382.51809 | -1.147026259 | 0.00011252 |
| H3f3aos    | 162.68111  | -1.045630909 | 0.00062118 |
| Hao        | 1680.31923 | -1.773760742 | 2.16E-10   |
| Hacd1      | 335.167572 | 1.025735335  | 8.44E-10   |
| Hacd4      | 313.082966 | -1.146372209 | 0.00012185 |
| Hars       | 2647.78974 | 1.167810001  | 1.84E-10   |
| Haus4      | 1259.65221 | 1.026568147  | 7.38E-06   |
| Havcr2     | 148.43654  | 1.955146283  | 9.17E-17   |
| Hax1       | 1027.19904 | 1.517018505  | 1.35E-12   |
| Hbegf      | 158.77469  | 1.354683862  | 1.92E-05   |
| Hbp1       | 1142.3151  | -1.146752522 | 7.22E-10   |
| Hck        | 89.1746981 | -1.805785678 | 2.39E-20   |

|           |            |              |            |
|-----------|------------|--------------|------------|
| Hcst      | 1245.99053 | -2.602168897 | 1.74E-37   |
| Hdac9     | 301.78941  | -1.290732896 | 0.00065639 |
| Hdgf      | 8215.63276 | 1.190715007  | 7.09E-07   |
| Hdhd5     | 2716.35586 | -1.070136657 | 2.38E-07   |
| Hdlbp     | 10961.779  | 1.119283124  | 7.17E-15   |
| Hells     | 4898.64878 | 1.435488899  | 3.19E-08   |
| Hemk1     | 816.528395 | 1.594370177  | 1.80E-11   |
| Herc3     | 6530.68999 | -1.225689347 | 3.01E-08   |
| Hhat      | 750.697804 | 1.922281289  | 4.41E-22   |
| Hid1      | 1386.13307 | -3.674552999 | 8.36E-87   |
| Higd1a    | 2028.39223 | 1.020986917  | 0.00020713 |
| Hip1      | 1934.04049 | 2.798668961  | 2.19E-11   |
| Hipk2     | 5183.61908 | -1.762270703 | 1.32E-12   |
| Hirip3    | 1038.36921 | 1.595215189  | 1.29E-11   |
| Hist1h1a  | 7387.31266 | 1.262615029  | 0.00760273 |
| Hist1h1t  | 144.410267 | 1.908131645  | 1.16E-10   |
| Hist1h2ah | 1028.79413 | 1.517138127  | 0.0007381  |
| Hist1h2bc | 5590.87618 | 1.741484756  | 3.56E-05   |
| Hist1h2bh | 5514.26928 | 1.073331896  | 0.01045003 |
| Hist1h2bj | 4287.19091 | 1.903850236  | 5.04E-06   |
| Hist1h2bk | 3528.31875 | 1.316933342  | 0.00155439 |
| Hist1h2bl | 3173.45331 | 1.040095959  | 0.01368342 |
| Hist1h2bm | 6476.30387 | 1.089085612  | 0.00746345 |
| Hist1h2bp | 1034.77244 | 1.050150682  | 0.01367865 |
| Hist1h3a  | 4909.22746 | 1.23019769   | 0.00595776 |
| Hist1h3c  | 12510.639  | 1.074499899  | 0.02612949 |
| Hist1h3e  | 10344.9022 | 1.091620069  | 0.01287906 |
| Hist1h3g  | 2557.86521 | 1.086944895  | 0.02440511 |
| Hist1h4i  | 1124.73805 | 1.007919521  | 0.02486412 |
| Hist2h2ac | 3093.32229 | 1.162418594  | 0.00583434 |
| Hivep3    | 6600.21144 | 1.836570572  | 1.85E-28   |
| Hk2       | 3921.05    | 1.961926052  | 8.16E-10   |
| Hmbs      | 1065.75839 | 1.154600329  | 3.86E-09   |
| Hmga1     | 2283.48251 | 1.087252143  | 2.08E-08   |
| Hmgb3     | 810.156995 | 1.625166703  | 3.23E-11   |
| Hmgcr     | 8121.50914 | 1.356744711  | 5.50E-10   |
| Hmgcs1    | 3598.44532 | 1.341206993  | 1.01E-07   |
| Hmgn1     | 2964.34024 | 1.365934611  | 4.86E-11   |
| Hmgn3     | 146.664589 | 1.87130634   | 6.24E-21   |
| Hmgn5     | 887.837233 | 1.017218425  | 0.0002897  |
| Hmmr      | 2872.54174 | 1.315253178  | 2.73E-05   |
| Hmox1     | 137.428856 | 1.197552749  | 2.32E-05   |
| Hn1l      | 1471.6015  | 1.05485641   | 4.34E-12   |
| Hnrnpa1   | 17072.4031 | 1.314607221  | 1.82E-14   |
| Hnrnpab   | 8386.5265  | 1.602956534  | 3.32E-10   |
| Hnrnp1l   | 1823.97617 | 1.766342862  | 2.68E-42   |
| Hopx      | 916.380263 | -1.092469431 | 6.24E-08   |
| Hpcal1    | 7659.41033 | -1.448988158 | 1.98E-08   |
| Hpgds     | 453.574409 | -1.329400992 | 6.80E-09   |
| Hras      | 845.371416 | 1.198112572  | 1.11E-05   |

|           |            |              |            |
|-----------|------------|--------------|------------|
| Hsd17b11  | 798.818012 | -1.000589724 | 1.04E-12   |
| Hsd11     | 1504.21685 | -1.036287898 | 2.21E-09   |
| Hsp90aa1  | 18617.063  | 1.454597073  | 1.21E-05   |
| Hsp90ab1  | 58251.7437 | 1.208646258  | 5.21E-07   |
| Hsp90b1   | 7801.98477 | 1.038349391  | 0.00030606 |
| Hspa13    | 551.153931 | 1.145313208  | 7.01E-05   |
| Hspa4l    | 2061.38899 | 1.248957852  | 5.77E-16   |
| Hspa9     | 10623.5225 | 1.477652295  | 3.71E-27   |
| Hspd1     | 10665.7566 | 1.981676529  | 1.01E-24   |
| Hspd1-ps3 | 160.591    | 1.23217881   | 4.96E-07   |
| Hsph1     | 2937.31543 | 1.017719783  | 0.00106255 |
| Htra2     | 468.130555 | 1.209693287  | 1.85E-12   |
| Hunk      | 128.154915 | 1.530263847  | 1.64E-09   |
| Hyal2     | 226.126328 | 1.201623869  | 4.57E-06   |
| Hyou1     | 4553.05729 | 1.500732071  | 1.47E-08   |
| lars      | 5802.01462 | 1.700977798  | 3.44E-40   |
| lcos      | 3287.90269 | 1.506772138  | 5.33E-51   |
| ldnk      | 1381.43423 | -1.131164431 | 1.94E-09   |
| ler5l     | 161.104934 | 1.140258745  | 0.00071345 |
| lfi206    | 3378.22077 | -2.722066099 | 1.53E-35   |
| lfi208    | 2469.79701 | -3.425119265 | 4.66E-57   |
| lfi209    | 3965.6784  | -2.993903878 | 2.22E-44   |
| lfi213    | 2143.96902 | -3.58835605  | 2.86E-28   |
| lfi214    | 1587.01952 | -2.693999187 | 2.30E-30   |
| lfi30     | 587.949475 | 1.317424924  | 8.26E-06   |
| lfit1     | 183.154463 | -1.364362854 | 7.05E-06   |
| lfit1bl1  | 519.627819 | -3.442500222 | 3.48E-35   |
| lfit1bl2  | 124.903973 | -1.212430403 | 4.04E-06   |
| lfit3     | 197.781959 | -1.486864419 | 1.19E-12   |
| lfitm1    | 1930.87479 | -2.50591708  | 0.00137777 |
| lfitm10   | 326.992945 | -2.279378886 | 5.28E-16   |
| lfnar2    | 1706.9671  | -1.242424395 | 1.29E-09   |
| lfng      | 1218.72912 | 3.826975051  | 6.92E-12   |
| lfngr1    | 12643.5946 | -1.024366817 | 4.24E-09   |
| lfngr2    | 1311.28513 | -2.042855855 | 8.82E-25   |
| lfrd2     | 1130.9832  | 1.192807175  | 2.38E-13   |
| lft43     | 160.124052 | 1.370387349  | 4.18E-11   |
| lgf2bp2   | 351.545432 | -2.555894921 | 8.16E-15   |
| lgf2bp3   | 1320.83122 | 1.006712824  | 3.21E-05   |
| lgfbp4    | 3108.27514 | -3.078706832 | 1.88E-17   |
| lgfbp7    | 1728.99254 | 4.428327916  | 4.60E-96   |
| lghj4     | 129.477779 | -1.006000162 | 7.33E-10   |
| lgsf3     | 384.320021 | -1.320476733 | 1.19E-07   |
| lgsf8     | 652.585425 | 1.624595619  | 1.47E-12   |
| ligp1     | 2281.44971 | -3.139943643 | 4.62E-22   |
| lkbke     | 3283.67245 | -1.28129336  | 8.66E-08   |
| ll10rb    | 1638.69479 | -1.10577361  | 2.27E-27   |
| ll11ra1   | 298.415642 | -1.033565643 | 1.87E-08   |
| ll12rb2   | 11602.7669 | 1.207012749  | 1.03E-09   |
| ll16      | 568.986047 | -1.305827735 | 4.48E-20   |

|          |            |              |           |
|----------|------------|--------------|-----------|
| ll17ra   | 7216.99104 | -1.28140011  | 7.79E-14  |
| ll1rl1   | 95.5896715 | 1.308380903  | 6.81E-07  |
| ll27ra   | 4278.78382 | -1.568320507 | 1.50E-18  |
| ll2ra    | 23588.2245 | 1.827737965  | 3.29E-11  |
| ll4ra    | 11740.0029 | -1.350309017 | 5.66E-16  |
| ll6ra    | 7075.76139 | -3.205178923 | 2.62E-19  |
| ll6st    | 9655.86854 | -1.979626211 | 3.04E-09  |
| ll7r     | 6069.90292 | 1.018854919  | 4.40E-06  |
| lmpg2    | 198.437837 | -1.187979686 | 9.13E-07  |
| lnpp5b   | 6344.75932 | 1.141629955  | 1.48E-16  |
| lnppl1   | 511.928584 | 1.896996162  | 3.41E-16  |
| lnsl6    | 238.704446 | -1.044192132 | 1.31E-05  |
| lntu     | 230.224279 | 1.708960162  | 6.95E-34  |
| lpo4     | 1536.17044 | 1.290562111  | 1.58E-09  |
| lpo5     | 9249.76824 | 1.207656772  | 2.79E-12  |
| lrak1bp1 | 187.017775 | 1.355512305  | 1.25E-10  |
| lrak4    | 1220.50424 | -1.044694031 | 2.60E-16  |
| lrf1     | 6084.24023 | -1.988042873 | 1.03E-19  |
| lrf4     | 5635.88149 | 1.974632893  | 1.80E-07  |
| lrf5     | 448.565483 | 1.186077634  | 5.64E-08  |
| lrgc1    | 149.572205 | -1.378701558 | 2.49E-11  |
| lrgm1    | 3251.2194  | -1.3751818   | 9.39E-14  |
| lrgm2    | 2478.74894 | -1.824206906 | 2.16E-29  |
| ltga2    | 390.446736 | -2.554109055 | 4.59E-23  |
| ltga3    | 340.539312 | 2.271313     | 2.17E-32  |
| ltga4    | 7199.02581 | -1.767207925 | 1.01E-14  |
| ltga7    | 236.089348 | -2.381597411 | 0.0001546 |
| ltgae    | 4483.4634  | -3.948670256 | 3.96E-42  |
| ltgav    | 3544.66632 | 1.134194967  | 3.41E-14  |
| ltgax    | 96.8103919 | -1.56348821  | 2.24E-06  |
| ltgb3    | 4529.41622 | -1.573409665 | 9.08E-16  |
| ltgb7    | 10963.8075 | -2.087545038 | 1.68E-16  |
| ltih5    | 2572.40964 | 2.012405298  | 1.22E-15  |
| ltm2a    | 845.531519 | 1.497643293  | 7.59E-07  |
| ltm2b    | 7886.30029 | -1.169688154 | 2.38E-26  |
| ltm2c    | 1724.96864 | -1.256855931 | 3.93E-07  |
| ltpr2    | 10807.9356 | -1.856306347 | 1.43E-17  |
| ltpr3    | 4998.50689 | -1.146914767 | 1.11E-07  |
| ltpripl1 | 1423.10709 | 1.258144173  | 2.89E-07  |
| lzumo1r  | 221.541154 | 2.195454963  | 5.54E-24  |
| lzumo4   | 548.780408 | -1.783164455 | 7.99E-13  |
| Jak1     | 32653.5647 | -1.021784685 | 1.03E-17  |
| Jakmip1  | 6583.60576 | -1.729440425 | 7.49E-15  |
| Jazf1    | 2462.44101 | 1.92469515   | 1.17E-10  |
| Jcad     | 152.535058 | 1.274896191  | 2.03E-10  |
| Jun      | 2886.52302 | -2.0242816   | 4.56E-07  |
| Junos    | 476.489088 | -1.435948999 | 7.23E-13  |
| Kat2b    | 6610.15855 | -1.034081548 | 8.44E-05  |
| Kbtbd11  | 6770.16403 | -1.588671657 | 1.14E-29  |
| Kbtbd3   | 359.716036 | -1.036456303 | 1.04E-05  |



|         |            |              |            |
|---------|------------|--------------|------------|
| Kcna2   | 487.024353 | -2.538672208 | 1.65E-28   |
| Kcnc1   | 337.551733 | -2.444998546 | 5.32E-15   |
| Kcnh2   | 245.251396 | -1.720671687 | 4.03E-12   |
| Kcnh4   | 328.032974 | -1.227857134 | 8.34E-06   |
| Kcnh6   | 1596.32019 | -1.296155294 | 0.00099771 |
| Kcnj15  | 129.359262 | -1.109554245 | 1.45E-05   |
| Kcnk10  | 557.392452 | 4.226694962  | 3.49E-46   |
| Kdelc1  | 354.258988 | 1.528436851  | 4.38E-19   |
| Kdelc2  | 504.168688 | 1.276159278  | 3.73E-12   |
| Kdm3a   | 7293.92848 | -1.00483562  | 6.12E-16   |
| Kdm6b   | 1834.31545 | -1.00759355  | 0.00014579 |
| Kdm7a   | 2435.10447 | -1.483017039 | 5.95E-10   |
| Kif15   | 5952.51445 | 1.335642502  | 1.25E-07   |
| Kif20a  | 1910.09182 | 1.177887609  | 9.43E-05   |
| Kif20b  | 3284.71885 | 1.024455932  | 5.91E-05   |
| Kif21b  | 14449.6092 | -1.186990192 | 2.06E-06   |
| Kif24   | 2341.82298 | 1.049667115  | 3.65E-05   |
| Kif2c   | 1660.37926 | 1.491862362  | 9.84E-08   |
| Kif4    | 3525.42482 | 1.125204914  | 5.06E-05   |
| Kif5a   | 125.918968 | 1.074839512  | 1.47E-07   |
| Kifap3  | 576.836567 | 1.481035124  | 5.49E-18   |
| Kifc2   | 176.847731 | -1.469063474 | 6.65E-10   |
| Kirrel  | 1309.81411 | -4.418138481 | 2.04E-38   |
| Kirrel3 | 391.266254 | -1.120267099 | 1.75E-08   |
| Klc1    | 4769.41814 | 1.14617815   | 2.34E-05   |
| Klf11   | 844.18161  | -1.419787036 | 0.00041352 |
| Klf13   | 17988.8193 | -1.111235717 | 1.66E-11   |
| Klf2    | 5222.4889  | -3.163892284 | 1.98E-25   |
| Klf3    | 5220.38629 | -4.090776312 | 4.30E-55   |
| Klhdc1  | 1634.75712 | -2.163676746 | 6.54E-09   |
| Klhl23  | 126.099446 | 1.412524943  | 1.27E-09   |
| Klhl24  | 2536.50541 | -1.19634872  | 3.56E-15   |
| Klhl3   | 986.971671 | -1.093828647 | 0.0002281  |
| Klhl30  | 98.2650812 | -1.108090135 | 4.99E-06   |
| Klhl42  | 1637.74439 | -1.012193247 | 0.00043338 |
| Klhl6   | 6474.64204 | -1.311362698 | 1.22E-15   |
| Klk8    | 1330.44691 | -1.566257998 | 9.62E-09   |
| Klra5   | 285.972236 | 2.987763384  | 2.43E-19   |
| Klrc1   | 1856.13167 | 3.932439411  | 9.61E-41   |
| Klrc2   | 410.852346 | 2.838991075  | 5.31E-19   |
| Klrc3   | 107.025013 | 1.272139414  | 5.05E-06   |
| Klre1   | 214.565099 | 1.806807477  | 5.84E-13   |
| Klri2   | 202.307501 | 1.967504571  | 1.27E-19   |
| Klrk1   | 5915.04456 | 2.167615661  | 9.55E-11   |
| Kmt2c   | 12827.7197 | -1.022473688 | 1.17E-10   |
| Kntc1   | 3880.81387 | 1.516031647  | 7.39E-11   |
| Kpna2   | 4598.87578 | 1.332488567  | 2.43E-06   |
| Krba1   | 659.419795 | -1.908999707 | 2.71E-12   |
| Kremen2 | 139.938633 | -1.579738193 | 5.24E-10   |
| Ksr2    | 531.372817 | -2.761832356 | 3.14E-13   |

|         |            |              |            |
|---------|------------|--------------|------------|
| Kyat3   | 356.423342 | 1.141633716  | 2.87E-11   |
| L1cam   | 564.730601 | -1.668417871 | 5.60E-20   |
| L2hgdh  | 499.834476 | 1.231199998  | 6.88E-18   |
| Lacc1   | 104.030339 | 1.158450449  | 4.44E-10   |
| Lad1    | 278.856597 | 3.408781719  | 2.04E-05   |
| Lag3    | 2550.40185 | 2.060747606  | 2.46E-12   |
| Lair1   | 956.178572 | -2.225655718 | 1.07E-08   |
| Lama5   | 411.736164 | 1.675841844  | 5.88E-07   |
| Lap3    | 1843.54599 | 1.074423064  | 2.11E-07   |
| Lars    | 4814.09867 | 1.286775233  | 8.99E-21   |
| Lats2   | 407.597589 | -1.686466005 | 8.66E-15   |
| Lca5    | 815.899278 | -1.165833049 | 7.31E-07   |
| Lcn4    | 328.624238 | -2.125019313 | 5.12E-15   |
| Ldha    | 40325.6603 | 1.765312543  | 8.36E-07   |
| Ldhb    | 217.524347 | 1.570739618  | 1.25E-15   |
| Ldlrad1 | 107.501527 | -1.081449931 | 7.14E-07   |
| Ldlrad4 | 3339.02395 | -1.931959938 | 2.23E-11   |
| Ldlrap1 | 1718.06162 | -1.757834346 | 7.99E-13   |
| Lef1    | 22969.8144 | -1.831554094 | 2.56E-14   |
| Leng9   | 265.462708 | -1.245507776 | 9.32E-07   |
| Lfng    | 7791.512   | -1.366328397 | 1.49E-09   |
| Lgals8  | 2059.85196 | -1.378329939 | 7.22E-15   |
| Lhfpl2  | 162.198972 | 1.598988717  | 3.41E-12   |
| Lhfpl3  | 212.630084 | -1.719394596 | 1.34E-10   |
| Lif     | 597.647527 | 1.08694008   | 0.02197496 |
| Lig1    | 5627.21513 | 1.297215526  | 6.16E-06   |
| Limd2   | 10800.3894 | -1.087795982 | 2.48E-06   |
| Lipg    | 186.26325  | 2.136443414  | 8.95E-14   |
| Litaf   | 1090.80485 | 1.602957864  | 1.09E-14   |
| Lman1   | 1879.77449 | 1.268136796  | 3.27E-25   |
| Lmbr1l  | 1816.75493 | -1.002874296 | 1.76E-06   |
| Lmf1    | 2343.1752  | -1.018272675 | 4.45E-05   |
| Lmnb2   | 1236.08474 | 1.006212413  | 5.76E-08   |
| Lmtk3   | 466.130978 | 1.036295108  | 0.00056867 |
| Lncpint | 13041.5587 | -1.342063784 | 1.61E-06   |
| Lonp1   | 3985.32145 | 1.668301049  | 3.78E-12   |
| Lonp2   | 7871.01641 | -1.075512181 | 8.45E-08   |
| Lonrf3  | 193.491459 | 1.075069982  | 3.46E-07   |
| Lpar3   | 120.751903 | 1.825595592  | 5.05E-18   |
| Lpgat1  | 2477.67032 | 1.056771552  | 1.70E-08   |
| Lrmp    | 7299.20991 | 1.025393493  | 1.73E-13   |
| Lrp8    | 1277.81227 | 1.753587001  | 5.72E-17   |
| Lrr1    | 330.868058 | 1.247740672  | 1.34E-08   |
| Lrrc3b  | 128.246394 | -1.076621589 | 5.91E-05   |
| Lrrc49  | 193.264122 | 1.95342683   | 6.07E-31   |
| Lrrc59  | 3904.70881 | 1.125735346  | 3.37E-08   |
| Lrrc61  | 512.497648 | -1.191994332 | 1.37E-08   |
| Lrrc75b | 312.686566 | -2.21274227  | 9.18E-15   |
| Lrrc8a  | 173.086375 | -1.193386727 | 1.77E-07   |
| Lrrc8d  | 7854.48924 | 1.020017095  | 0.00075766 |

|          |            |              |            |
|----------|------------|--------------|------------|
| Lrrk1    | 1614.14883 | 1.782811052  | 1.78E-11   |
| Lrrk2    | 126.359391 | 1.488948289  | 1.41E-09   |
| Lsm2     | 960.239237 | 1.143624091  | 2.87E-07   |
| Lsm3     | 964.952749 | 1.058930171  | 8.36E-06   |
| Lsp1     | 7781.73098 | -1.067584927 | 1.11E-12   |
| Lss      | 841.704245 | 1.037592089  | 6.10E-06   |
| Ltb      | 5681.39537 | -2.291841247 | 3.14E-10   |
| Ltbp3    | 165.433657 | 1.974153454  | 7.44E-15   |
| Ly6a     | 2832.31293 | -1.693918399 | 9.43E-06   |
| Ly6c2    | 3140.80193 | -2.125859577 | 5.99E-10   |
| Ly6g5b   | 126.253772 | -1.601484887 | 6.94E-08   |
| Lyar     | 1922.70832 | 1.577796234  | 6.25E-18   |
| Lyn      | 305.055039 | 1.002084367  | 0.00079452 |
| Lynx1    | 109.811693 | -1.410298972 | 6.56E-13   |
| Lypd6b   | 1504.83267 | -3.299782819 | 3.59E-28   |
| Lysmd1   | 390.446631 | -1.012658339 | 8.97E-05   |
| Maats1   | 515.81656  | 4.419636497  | 2.80E-119  |
| Macf1    | 51087.4465 | -1.017235123 | 1.47E-14   |
| Madd     | 8582.06223 | -1.02934828  | 3.99E-16   |
| Maff     | 640.770022 | -1.239690763 | 0.0036069  |
| Mafg     | 932.748779 | 1.415524055  | 5.55E-12   |
| Maged2   | 203.069742 | 1.372114265  | 1.87E-09   |
| Malat1   | 63054.595  | -1.162704398 | 0.00055033 |
| Mamdc2   | 192.002329 | 2.264633064  | 1.67E-09   |
| Maml2    | 32362.5724 | -1.183717325 | 0.00021197 |
| Maml3    | 10282.0519 | -1.128343191 | 2.48E-05   |
| Maneal   | 208.63906  | -1.175931704 | 3.50E-11   |
| Manf     | 2092.6358  | 1.094844536  | 0.00014175 |
| Map3k20  | 360.289058 | 3.377877109  | 1.74E-42   |
| Map3k8   | 4629.55279 | -1.448228357 | 4.04E-07   |
| Map4k3   | 762.4649   | -1.027443716 | 5.07E-08   |
| Map9     | 434.184131 | 1.923572802  | 1.10E-23   |
| Mapk1ip1 | 1009.19663 | -1.482737751 | 8.33E-08   |
| March3   | 1904.49372 | -2.274882177 | 8.42E-14   |
| March8   | 304.575967 | 2.366939304  | 4.14E-37   |
| Marcks   | 116.295154 | 1.082681847  | 2.88E-07   |
| Marcks1  | 628.797687 | 2.411164136  | 7.33E-13   |
| Mars     | 3452.46167 | 1.788840554  | 1.04E-19   |
| Marveld2 | 401.652107 | 1.351836607  | 1.27E-15   |
| Mast2    | 3313.15719 | 1.306001334  | 2.28E-19   |
| Mastl    | 1916.34723 | 1.052329247  | 0.0001145  |
| Matk     | 814.104739 | -1.343294358 | 4.04E-09   |
| Mbp      | 9518.87791 | -1.158435018 | 1.82E-11   |
| Mcm10    | 2544.52016 | 1.860793234  | 5.88E-13   |
| Mcm2     | 5874.94855 | 1.23566167   | 1.19E-05   |
| Mcm3     | 8687.95646 | 1.346828483  | 1.84E-06   |
| Mcm4     | 7644.59954 | 1.085355389  | 1.85E-05   |
| Mcm5     | 8887.73617 | 1.33763104   | 1.23E-05   |
| Mcm6     | 12305.3399 | 1.251034976  | 1.72E-07   |
| Mcm7     | 7424.34228 | 1.250367692  | 8.36E-06   |

|          |            |              |            |
|----------|------------|--------------|------------|
| Mcm8     | 825.93972  | 1.427297934  | 7.47E-12   |
| Mcoln2   | 2274.54466 | -1.214752986 | 3.22E-06   |
| Mcoln3   | 171.221362 | -1.498662886 | 7.82E-13   |
| Mctp1    | 398.925802 | 2.332991908  | 1.87E-07   |
| Mctp2    | 7873.48627 | -1.356656256 | 3.98E-07   |
| Mcu      | 2447.80919 | 1.486598902  | 9.21E-09   |
| Mdh2     | 5631.09012 | 1.071573888  | 8.84E-07   |
| Megf11   | 1657.8718  | -1.195774751 | 5.86E-06   |
| Megf8    | 114.412818 | 1.665732164  | 9.33E-09   |
| Melk     | 1559.8724  | 1.536242265  | 1.03E-08   |
| Mettl27  | 741.891311 | -2.796592082 | 7.86E-37   |
| Mex3b    | 301.566279 | -1.03039447  | 4.29E-05   |
| Mfhas1   | 3106.86557 | 1.176539559  | 2.47E-05   |
| Mfsd13a  | 597.542921 | 1.553552787  | 1.36E-13   |
| Mfsd2a   | 622.232293 | 1.173887513  | 0.00012029 |
| Mgat4a   | 4856.69162 | -1.230829146 | 7.03E-07   |
| Mgme1    | 474.518255 | 1.13460876   | 3.09E-15   |
| Mgst2    | 7055.33618 | -1.988612479 | 6.86E-09   |
| Mical3   | 928.450575 | 1.334498333  | 4.40E-09   |
| Mif      | 6499.77393 | 1.399530437  | 3.56E-05   |
| Mir155hg | 1906.74568 | 1.649478445  | 1.35E-10   |
| Mki67    | 36660.7574 | 1.280349027  | 9.98E-06   |
| Mlf1     | 155.668506 | 1.029052477  | 0.00341558 |
| Mlf2     | 2286.97298 | 1.036067262  | 0.00030258 |
| Mlkl     | 695.007632 | 1.149391487  | 1.43E-07   |
| Mmaa     | 437.575442 | -1.221556835 | 0.00017368 |
| Mmd      | 1126.90187 | 1.05774752   | 3.81E-16   |
| Mmp15    | 127.412365 | -1.551258885 | 1.76E-09   |
| Mnd1     | 631.464345 | 2.187418799  | 1.41E-17   |
| Mndal    | 5696.5809  | -1.84155485  | 8.46E-12   |
| Mob3c    | 756.323581 | -1.138674184 | 1.17E-13   |
| Mogs     | 2723.23498 | 1.351229236  | 3.45E-07   |
| Morc1    | 120.018992 | -1.890821897 | 8.40E-15   |
| Morf4l2  | 2924.70615 | 1.213738878  | 1.42E-07   |
| Morn4    | 121.686407 | 1.283326242  | 2.57E-15   |
| Mospd1   | 637.769053 | -1.076314963 | 6.20E-17   |
| Mpp6     | 2522.61966 | 1.169513927  | 3.94E-10   |
| Mppe1    | 1967.54227 | -1.083097119 | 4.79E-11   |
| Mpv17l   | 549.54625  | -1.118879731 | 0.00203998 |
| Mpzl2    | 127.913127 | 1.788560404  | 1.78E-08   |
| Mpzl3    | 856.076809 | 2.243386779  | 2.42E-23   |
| Mrgpra6  | 120.351718 | 1.937207504  | 1.96E-10   |
| Mrgpra9  | 91.8556849 | 1.361063757  | 9.85E-07   |
| Mroh3    | 115.61829  | -1.264975187 | 8.19E-05   |
| Mroh5    | 210.935986 | -1.465496461 | 6.15E-16   |
| Mrpl11   | 805.907387 | 1.029885639  | 5.17E-06   |
| Mrpl12   | 1032.60247 | 1.081323424  | 0.00036212 |
| Mrpl28   | 1015.6892  | 1.230002866  | 9.32E-09   |
| Mrpl45   | 1399.82768 | 1.286416984  | 1.19E-10   |
| Mrpl51   | 1260.41529 | 1.023541781  | 3.21E-05   |

|         |            |              |            |
|---------|------------|--------------|------------|
| Mrps6   | 1217.7885  | 1.558720794  | 1.62E-16   |
| Mrps7   | 1232.77548 | 1.118314582  | 8.08E-08   |
| Mrto4   | 1464.48122 | 1.317142681  | 9.61E-11   |
| Mrvi1   | 159.229917 | -1.218637085 | 2.58E-10   |
| Ms4a4b  | 20649.9889 | -2.339642389 | 2.91E-59   |
| Ms4a4c  | 1238.95371 | -1.675386034 | 0.0001895  |
| Ms4a4d  | 119.82684  | -1.087581069 | 4.79E-11   |
| Ms4a6b  | 17552.1342 | -1.8339251   | 1.04E-42   |
| Mst1    | 127.308807 | -1.022803781 | 3.80E-08   |
| Mt1     | 550.962795 | 2.927040817  | 4.36E-12   |
| Mt2     | 145.941008 | 2.059783106  | 1.66E-10   |
| Mtbp    | 2682.34484 | 1.28822736   | 2.67E-13   |
| Mtf2    | 3506.61256 | 1.096898517  | 2.93E-06   |
| Mtfp1   | 121.88191  | 1.051755377  | 4.33E-05   |
| Mtfr2   | 644.868993 | 1.388780344  | 1.70E-08   |
| Mthfd1  | 2872.78131 | 1.147721163  | 5.19E-18   |
| Mthfd2  | 2650.43928 | 1.718973355  | 7.23E-27   |
| Mturn   | 1668.24303 | -3.361998374 | 5.26E-43   |
| Mx2     | 231.971584 | 1.769434132  | 5.56E-07   |
| Mxd4    | 1455.02323 | -1.754766964 | 7.32E-20   |
| Mxi1    | 2390.41516 | 1.710504637  | 1.98E-10   |
| Myb     | 2303.05157 | 1.194006337  | 0.00098509 |
| Mybbp1a | 9517.85905 | 1.236359361  | 9.25E-09   |
| Mybl2   | 2062.20642 | 1.82105315   | 8.06E-15   |
| Mybpc3  | 199.67689  | -1.594202864 | 8.59E-24   |
| Myh10   | 1583.71457 | 1.831166964  | 1.36E-20   |
| Myl10   | 682.591741 | -2.823910673 | 1.07E-20   |
| Mylip   | 1496.19871 | -3.200911173 | 8.76E-97   |
| Myo10   | 3878.51188 | 3.967205566  | 6.40E-38   |
| Myo16   | 170.594695 | 1.352599115  | 3.22E-06   |
| Myo18b  | 124.446528 | -1.523353664 | 1.67E-07   |
| Myo19   | 639.397629 | 1.300249435  | 8.13E-26   |
| Myo1e   | 3576.81101 | 2.087908809  | 4.32E-14   |
| Myo1f   | 4739.34201 | -1.457166277 | 1.97E-13   |
| Myo3b   | 2100.91731 | -4.027802915 | 4.56E-27   |
| N4bp2l1 | 1586.88697 | -1.344934997 | 3.62E-06   |
| Nab2    | 977.694159 | 1.861537478  | 3.77E-12   |
| Nacad   | 362.79626  | -1.707256301 | 1.19E-20   |
| Nacc1   | 4432.75878 | 1.040577999  | 1.48E-06   |
| Nacc2   | 489.19298  | -2.5094563   | 1.14E-19   |
| Nars    | 4933.9902  | 1.413985648  | 3.22E-18   |
| Nasp    | 5825.56813 | 1.395724946  | 3.54E-09   |
| Nav1    | 309.38892  | 1.322044828  | 0.00024145 |
| Nav2    | 511.719521 | -1.300534756 | 0.00042597 |
| Ncald   | 697.973359 | -1.614305461 | 1.79E-08   |
| Ncapd2  | 8980.86492 | 1.028094886  | 0.00026476 |
| Ncapg   | 2917.39408 | 1.140351381  | 0.0003461  |
| Ncapg2  | 6608.73656 | 1.203000263  | 5.81E-06   |
| Ncaph   | 2934.90067 | 1.279611031  | 2.50E-07   |
| Ncf1    | 1364.30883 | -1.180424684 | 9.86E-08   |

|         |            |              |            |
|---------|------------|--------------|------------|
| Ncf4    | 1573.32947 | -1.023840064 | 4.31E-15   |
| Nck2    | 5124.49375 | -1.41511155  | 1.19E-05   |
| Nckap5l | 1014.17887 | -1.729272843 | 4.35E-13   |
| Ncl     | 33857.2861 | 1.028167757  | 1.03E-07   |
| Ncs1    | 460.697057 | 3.294875515  | 2.48E-48   |
| Ndc1    | 2073.24253 | 1.884698399  | 1.84E-35   |
| Ndc80   | 2309.0271  | 1.056067039  | 8.32E-07   |
| Ndufa4  | 1662.54396 | 1.014248652  | 3.26E-05   |
| Neat1   | 5424.40716 | -1.205582873 | 0.00141342 |
| Neb     | 4468.73402 | 1.947569839  | 9.46E-23   |
| Nedd4l  | 5871.84214 | -1.984998745 | 1.86E-16   |
| Nefh    | 1436.38551 | 1.477448973  | 3.64E-08   |
| Nek2    | 1505.60035 | 1.231654011  | 2.83E-05   |
| Nek4    | 356.660684 | 1.528945715  | 5.51E-31   |
| Nek6    | 2091.00486 | 3.496831381  | 1.70E-53   |
| Nemp1   | 1727.5495  | 1.045051439  | 2.09E-12   |
| Nespas  | 212.929148 | 1.094132017  | 0.00049964 |
| Neurl1b | 699.78736  | -1.183313389 | 7.63E-05   |
| Nf1     | 2495.13373 | 1.689999236  | 2.26E-19   |
| Nfat5   | 6797.68009 | 1.767291984  | 3.85E-22   |
| Nfe2l3  | 599.915644 | -1.39123543  | 8.12E-05   |
| Nfia    | 1803.35084 | -1.544393316 | 5.70E-06   |
| Nfil3   | 1047.13631 | 1.406639005  | 0.0005191  |
| Nfkbia  | 4126.51645 | -1.110391809 | 0.01182099 |
| Nfkbid  | 1731.04214 | -1.042919118 | 0.00117541 |
| Nfkbie  | 1363.05209 | -1.153679378 | 7.11E-07   |
| Nfkbiz  | 4175.60207 | -1.216950864 | 2.49E-08   |
| Ngly1   | 6886.31256 | -1.018544119 | 1.29E-05   |
| Nhp2    | 2497.26439 | 1.133846268  | 5.36E-05   |
| Nhsl2   | 198.317252 | -1.041808001 | 1.37E-05   |
| Nid1    | 140.20072  | 2.222568903  | 4.40E-15   |
| Nin     | 9757.85797 | -1.413440076 | 5.37E-56   |
| Nipa1   | 165.768913 | -1.290738747 | 4.45E-05   |
| Nipal1  | 840.416483 | -2.334808804 | 2.61E-39   |
| Nipal3  | 2833.73699 | -1.396243668 | 4.03E-18   |
| Nkain1  | 184.400684 | 2.516876399  | 2.19E-29   |
| Nkd2    | 266.375182 | -1.080869126 | 2.62E-07   |
| Nlgn2   | 785.965417 | 1.58010638   | 1.18E-09   |
| Nlrp1b  | 88.8656313 | -1.173771607 | 1.10E-05   |
| Nmi     | 1671.09638 | -1.127610796 | 6.29E-15   |
| Nmnat2  | 295.480033 | -1.353413146 | 4.78E-10   |
| Nmral1  | 458.057041 | 1.059008706  | 9.62E-09   |
| Noc2l   | 4556.05928 | 1.028001672  | 1.78E-09   |
| Noc4l   | 1746.15232 | 1.243340582  | 8.21E-08   |
| Nod1    | 2845.56198 | -4.576110785 | 1.32E-76   |
| Nod2    | 116.669509 | -1.582286669 | 4.24E-17   |
| Nol4l   | 555.174698 | 2.550231923  | 9.24E-31   |
| Nolc1   | 4808.12239 | 1.443413622  | 1.08E-13   |
| Nop16   | 1160.67566 | 1.267238072  | 3.37E-12   |
| Nop2    | 3132.4633  | 1.179167606  | 4.00E-13   |

|             |            |              |            |
|-------------|------------|--------------|------------|
| Nop56       | 6630.85843 | 1.288686379  | 1.20E-16   |
| Npas4       | 194.298562 | 1.93771565   | 9.46E-27   |
| Npc2        | 6908.32299 | -1.405870988 | 3.10E-18   |
| Nphp1       | 215.659324 | 2.289761993  | 7.97E-36   |
| Nphp3       | 287.601715 | 1.063466488  | 2.69E-08   |
| Nr1d1       | 177.208351 | -1.268335027 | 1.12E-09   |
| Nr1d2       | 1649.22696 | -1.845197141 | 1.81E-18   |
| Nr4a2       | 2109.02875 | 1.316009554  | 0.00170503 |
| Nr4a3       | 4423.78988 | 2.725083292  | 2.97E-10   |
| Nrg2        | 328.172862 | -2.333343443 | 3.49E-10   |
| Nrgn        | 1280.23044 | 4.34912353   | 3.06E-41   |
| Nrip3       | 163.429863 | -1.225345944 | 7.43E-06   |
| Nrn1        | 855.25792  | 1.544690673  | 2.60E-08   |
| Nrp1        | 1656.84254 | 3.622080633  | 3.81E-22   |
| Nrp2        | 200.35268  | -1.579825219 | 1.26E-08   |
| Nsd2        | 10718.0279 | 1.016163151  | 1.11E-09   |
| Nsd3        | 24520.2335 | -1.445650244 | 1.36E-12   |
| Nsdhl       | 1032.95291 | 1.046644434  | 1.86E-11   |
| Nsg2        | 6745.11001 | -5.24536507  | 3.40E-101  |
| Nsl1        | 1343.38043 | 1.669453669  | 2.35E-11   |
| Nt5dc2      | 397.289465 | 1.711242914  | 1.85E-10   |
| Nudc        | 3240.72586 | 1.199327684  | 1.87E-10   |
| Nudcd2      | 1220.51081 | 1.538383405  | 1.01E-16   |
| Nudt14      | 845.487829 | -2.332623881 | 1.09E-26   |
| Nudt2       | 305.671044 | 1.072505025  | 1.18E-10   |
| Nudt5       | 2366.14196 | 1.120010122  | 4.50E-21   |
| Nudt6       | 522.630488 | -1.121363418 | 3.31E-05   |
| Nuf2        | 2063.98216 | 1.003313578  | 0.0011886  |
| Numbl       | 230.40875  | -1.007298309 | 3.25E-09   |
| Nup107      | 3893.11347 | 1.024477414  | 2.62E-24   |
| Nup155      | 4546.34831 | 1.141455186  | 3.34E-19   |
| Nup160      | 4386.29793 | 1.074344666  | 3.74E-21   |
| Nup205      | 7117.89725 | 1.17512222   | 1.95E-15   |
| Nup37       | 1094.14112 | 1.028175756  | 9.21E-11   |
| Nup85       | 3411.06007 | 1.299653028  | 1.14E-19   |
| Nxn1        | 133.499498 | -1.637842258 | 2.58E-10   |
| Nxpe3       | 3354.16684 | -1.05430801  | 1.48E-05   |
| Oas1b       | 875.211713 | -1.189370691 | 0.00102901 |
| Obscn       | 132.826835 | -1.392169216 | 4.30E-09   |
| Obsl1       | 143.150611 | 1.194287007  | 1.57E-05   |
| Oc90        | 163.707259 | -1.1548407   | 5.42E-07   |
| Ocel1       | 356.914931 | -1.158621767 | 7.26E-09   |
| Ocln        | 154.695594 | 1.976031769  | 2.98E-13   |
| Odc1        | 6784.3945  | 1.573495553  | 6.62E-10   |
| Olfml3      | 425.387415 | -1.830337276 | 5.24E-14   |
| Olfr172     | 120.250703 | -1.860489017 | 5.87E-11   |
| Olfr524     | 182.600306 | -1.740428072 | 1.67E-08   |
| Olfr56      | 1640.54607 | -1.570659597 | 1.97E-13   |
| Olfr755-ps1 | 101.287323 | -1.054546891 | 1.86E-07   |
| Olfr99      | 158.856371 | -1.249760403 | 1.27E-05   |

|          |            |              |            |
|----------|------------|--------------|------------|
| Oprm1    | 426.694788 | -1.620968543 | 2.28E-06   |
| Orai2    | 4999.68156 | -2.039069972 | 9.82E-22   |
| Orc1     | 522.066162 | 1.448159036  | 1.25E-10   |
| Orc6     | 1528.97258 | 1.337705921  | 5.55E-11   |
| Osbp1a   | 265.174248 | 1.2854906    | 3.38E-07   |
| Osbp15   | 1700.45747 | -1.09488937  | 4.64E-16   |
| Osgin2   | 980.919591 | 1.201456068  | 1.05E-13   |
| Osm      | 1333.07867 | -1.538058796 | 6.33E-09   |
| Otud1    | 272.137256 | -1.108914469 | 1.85E-09   |
| P4hb     | 9187.11622 | 1.123002957  | 0.00020445 |
| Pa2g4    | 8275.02641 | 1.308595239  | 8.51E-10   |
| Pabpc4   | 4973.553   | 1.667352781  | 1.05E-20   |
| Pacs1    | 5617.17314 | -1.200276067 | 1.68E-13   |
| Padi2    | 889.677616 | -1.13549106  | 7.79E-10   |
| Pag1     | 7662.63137 | -1.637980082 | 1.20E-15   |
| Palb2    | 836.461193 | 1.275682782  | 9.21E-11   |
| Palm3    | 834.622448 | -2.752170638 | 2.42E-14   |
| Pank1    | 551.508779 | 1.078007927  | 7.15E-07   |
| Panx1    | 3049.14332 | -1.162047777 | 6.38E-32   |
| Paqr7    | 882.828567 | -1.100974987 | 9.51E-09   |
| Pard3b   | 214.521672 | 2.302270011  | 6.91E-18   |
| Parm1    | 182.996731 | -2.225112554 | 1.11E-06   |
| Parp12   | 494.333799 | -1.610755532 | 2.60E-16   |
| Parppb   | 1525.62224 | 1.208499225  | 6.05E-06   |
| Parvb    | 92.7355155 | -1.548383039 | 2.28E-11   |
| Pask     | 968.621333 | 1.45530546   | 3.74E-11   |
| Patj     | 3985.59205 | -1.822223302 | 3.66E-09   |
| Patl2    | 752.27633  | -1.262784488 | 5.15E-13   |
| Pbk      | 921.193336 | 1.062101342  | 6.80E-05   |
| Pbx3     | 764.819291 | 1.605104983  | 3.36E-05   |
| Pced1b   | 9611.70775 | -1.460781028 | 6.99E-06   |
| Pck2     | 974.749306 | 2.52698098   | 1.84E-13   |
| Pcmt1    | 3963.2042  | -1.139985939 | 1.24E-05   |
| Pcnx2    | 94.2513931 | -1.231102492 | 1.56E-06   |
| Pcx      | 927.894557 | 2.163460446  | 2.47E-38   |
| Pcyox1l  | 358.471865 | 1.25492174   | 2.81E-12   |
| Pcyt1a   | 2184.2779  | 1.296728306  | 9.71E-09   |
| Pdap1    | 1854.07278 | 1.0191951    | 2.68E-10   |
| Pdcd1    | 2789.41828 | 3.375651186  | 4.22E-20   |
| Pdcd1lg2 | 472.111964 | 2.69370302   | 8.68E-24   |
| Pdcd4    | 9452.33353 | -1.76440182  | 1.14E-30   |
| Pde10a   | 111.613031 | 1.388111052  | 0.00011054 |
| Pde1a    | 166.395675 | 2.522723086  | 2.52E-29   |
| Pde3b    | 23989.3699 | -1.202764023 | 8.03E-05   |
| Pde4a    | 268.581578 | 1.658659925  | 4.21E-17   |
| Pde5a    | 368.810357 | -1.433424865 | 1.11E-13   |
| Pde6a    | 152.68815  | -1.249684168 | 2.83E-07   |
| Pde6b    | 238.455731 | -1.186902518 | 1.31E-09   |
| Pde8b    | 227.280017 | -1.284229846 | 2.71E-07   |
| Pde9a    | 169.28837  | -2.354602569 | 1.35E-13   |



|          |            |              |            |
|----------|------------|--------------|------------|
| Pdia6    | 3763.28622 | 1.492081266  | 3.00E-09   |
| Pdk2     | 204.651703 | -1.40465985  | 2.54E-12   |
| Pdlim4   | 1119.82527 | -2.575478693 | 3.79E-11   |
| Pdlim5   | 3502.84366 | -1.264359614 | 1.53E-09   |
| Pea15a   | 1451.03622 | -1.027187065 | 8.10E-13   |
| Peli1    | 21077.0835 | -1.483231713 | 2.41E-06   |
| Pelp1    | 2046.07831 | 1.250452501  | 4.48E-13   |
| Penk     | 123.551385 | 1.985431332  | 2.29E-11   |
| Pepd     | 4361.32507 | -1.036207371 | 7.26E-07   |
| Perp     | 252.131409 | 2.491274616  | 1.52E-20   |
| Pex11g   | 949.956614 | -2.396616276 | 1.44E-65   |
| Pfas     | 4781.96089 | 1.969134405  | 2.26E-27   |
| Pfkl     | 4437.34421 | 1.041874095  | 0.00226691 |
| Pgam1    | 3635.1459  | 1.486799401  | 2.19E-08   |
| Pgam2    | 346.903781 | -1.356781207 | 1.81E-15   |
| Pgk1     | 14642.3481 | 1.395622776  | 0.00021391 |
| Pglyrp1  | 508.162218 | -1.524444343 | 3.62E-09   |
| Pglyrp2  | 1458.02946 | -2.69271351  | 9.03E-56   |
| Pgp      | 651.885161 | 1.445163163  | 9.98E-06   |
| Pgpep1l  | 789.296133 | -2.539243817 | 3.25E-29   |
| Phactr2  | 3437.33489 | 2.698305816  | 2.38E-31   |
| Phb2     | 2838.85244 | 1.364840576  | 6.54E-08   |
| Phf1     | 721.598853 | -1.790594394 | 9.30E-16   |
| Phf11c   | 1050.32823 | -1.551386212 | 3.23E-11   |
| Phf21a   | 8300.85134 | -1.110549999 | 0.00016048 |
| Phgdh    | 6510.06299 | 1.553851955  | 6.01E-13   |
| Phlda3   | 202.260328 | 1.775254012  | 1.61E-08   |
| Phldb1   | 340.895234 | 1.427641784  | 1.97E-07   |
| Phldb3   | 335.12135  | -1.060570406 | 1.73E-06   |
| Phtf2    | 2413.9239  | 1.022054375  | 1.81E-05   |
| Pi4k2b   | 771.56173  | 1.278952392  | 6.91E-29   |
| Pidd1    | 901.292984 | 1.214141076  | 4.09E-09   |
| Pigv     | 970.381923 | -1.159177164 | 4.64E-07   |
| Pigz     | 203.410282 | -1.548182072 | 1.83E-16   |
| Pik3ap1  | 2262.08821 | 1.003718987  | 0.0009806  |
| Pik3c2b  | 258.498919 | 1.082818583  | 2.80E-08   |
| Pik3ip1  | 3258.40359 | -2.543626567 | 9.79E-27   |
| Pik3r2   | 510.106017 | 2.169704426  | 2.60E-26   |
| Pik3r5   | 10971.4842 | -1.508254525 | 1.26E-33   |
| Pilrb2   | 92.1646515 | -1.317057188 | 1.44E-05   |
| Pim3     | 1030.41306 | 1.209608941  | 3.10E-05   |
| Pink1    | 1481.82204 | -1.44770486  | 4.26E-09   |
| Pisd-ps1 | 716.031589 | -1.098822646 | 1.49E-07   |
| Pitpnc1  | 22864.7563 | -1.050843412 | 2.75E-06   |
| Pitpnm2  | 5297.43689 | 1.017263872  | 9.43E-07   |
| Pkd2     | 95.3201734 | 1.365612037  | 3.22E-11   |
| Pkig     | 578.64223  | 1.5903858    | 3.71E-38   |
| Pkm      | 35870.2944 | 1.013063676  | 0.00947294 |
| Pkmyt1   | 1192.82082 | 1.106277059  | 6.57E-07   |
| Pkn3     | 313.349622 | 1.877783684  | 8.71E-30   |

|         |            |              |            |
|---------|------------|--------------|------------|
| Pkp2    | 169.164216 | 1.648139972  | 1.45E-08   |
| Pla1a   | 493.528209 | 2.7098868    | 5.28E-23   |
| Pla2g4f | 124.578699 | 1.465816073  | 1.79E-12   |
| Plac8   | 9490.35822 | -1.486806524 | 8.29E-08   |
| Plagl2  | 2971.84238 | 1.275749789  | 1.67E-15   |
| Platr10 | 81.5527048 | -1.12507354  | 3.26E-05   |
| Plbd1   | 173.092251 | -1.018445005 | 1.12E-05   |
| Plcb2   | 2298.68161 | -1.764978883 | 1.63E-17   |
| Plce1   | 380.311648 | -2.771885577 | 7.64E-25   |
| Plcl1   | 1767.84578 | 1.563848764  | 1.07E-09   |
| Pld4    | 84.9941604 | -1.335760579 | 1.09E-13   |
| Plek    | 3620.22871 | 1.76879265   | 1.37E-09   |
| Plekha6 | 770.260544 | -2.292914339 | 6.28E-21   |
| Plekha7 | 501.341665 | 1.396165821  | 2.32E-09   |
| Plekha8 | 171.647213 | 1.589674538  | 4.08E-15   |
| Plekhg3 | 737.174784 | -1.36881567  | 1.86E-07   |
| Plekhg6 | 133.432065 | -1.091188941 | 9.39E-09   |
| Plekho1 | 1141.31264 | -1.599739829 | 1.33E-09   |
| Plin2   | 479.48697  | 2.141358377  | 2.64E-14   |
| Plk1    | 1838.04773 | 1.384928872  | 7.06E-06   |
| Plk2    | 380.761209 | 2.362947985  | 9.70E-13   |
| Plk4    | 2366.45642 | 1.216960698  | 1.22E-07   |
| Plod2   | 1659.09267 | 1.273927518  | 4.78E-07   |
| Plod3   | 596.213231 | 1.728133404  | 3.57E-13   |
| Pls1    | 701.26224  | 1.102944251  | 0.00024114 |
| Plscr1  | 2273.91886 | 2.167240754  | 3.74E-23   |
| Pltp    | 244.037821 | -2.287739735 | 1.42E-29   |
| Plxdc2  | 2961.16146 | 1.026675922  | 1.81E-05   |
| Plxna1  | 296.541349 | 1.756257179  | 3.59E-16   |
| Plxna3  | 265.873933 | 2.548612992  | 1.97E-18   |
| Plxnb2  | 173.263236 | 1.000493582  | 0.00478615 |
| Plxnc1  | 4390.71623 | 2.060629896  | 8.47E-25   |
| Plxnd1  | 380.819443 | 2.336629779  | 5.42E-09   |
| Pmel    | 958.360025 | -2.155370177 | 1.05E-56   |
| Pmvk    | 850.517277 | 1.441330824  | 3.74E-18   |
| Pnpla7  | 3067.46444 | -1.86663925  | 6.67E-15   |
| Pnrc1   | 4768.01624 | -1.074815534 | 1.49E-07   |
| Poc1a   | 896.251532 | 1.216202177  | 1.25E-11   |
| Podn    | 215.920303 | -1.182148093 | 1.15E-08   |
| Podxl   | 230.449803 | -1.040282265 | 3.79E-05   |
| Pola1   | 10979.9116 | 1.266860557  | 0.00080554 |
| Pold1   | 3594.89267 | 1.227426626  | 4.34E-06   |
| Pole    | 5675.34609 | 1.268984839  | 5.10E-09   |
| Pole3   | 1119.36987 | 1.341266861  | 1.72E-08   |
| Polk    | 2026.99676 | 1.123427003  | 3.20E-07   |
| Polq    | 2765.14322 | 1.764304912  | 2.91E-11   |
| Polr2c  | 1473.16184 | 1.026892011  | 1.83E-05   |
| Polr2e  | 1378.41718 | 1.400335122  | 2.43E-10   |
| Polr2f  | 1133.0097  | 1.101791287  | 1.06E-07   |
| Pop1    | 2541.74682 | 1.243842582  | 1.19E-25   |

|          |            |              |            |
|----------|------------|--------------|------------|
| Popdc2   | 140.947093 | 1.518884052  | 4.02E-15   |
| Pou6f1   | 1035.13499 | -3.499449175 | 1.03E-40   |
| Ppa1     | 2553.31662 | 1.5480024    | 3.52E-14   |
| Pparg    | 100.099209 | 1.343704002  | 2.54E-10   |
| Ppargc1b | 2652.31708 | -1.067910606 | 0.00135806 |
| Ppat     | 3244.1502  | 1.270564974  | 2.88E-15   |
| Ppfibp1  | 1120.15163 | 1.630240193  | 5.30E-24   |
| Ppil1    | 1899.83478 | 1.087087254  | 6.83E-09   |
| Ppm1h    | 34371.2265 | -1.734601482 | 9.59E-11   |
| Ppp1r13l | 203.830615 | 1.302552342  | 3.62E-08   |
| Ppp1r3b  | 320.356424 | 1.114561336  | 0.0036423  |
| Ppp1r9b  | 4228.1541  | -1.069341967 | 9.56E-07   |
| Pqlc1    | 343.385549 | -1.188945265 | 1.83E-15   |
| Prag1    | 1041.2221  | -1.166773616 | 1.29E-05   |
| Prdm1    | 529.355157 | 2.167514169  | 1.75E-10   |
| Prdm11   | 1179.50041 | -1.443527733 | 1.25E-09   |
| Prdm5    | 304.261146 | 2.259646265  | 2.01E-12   |
| Prdx2    | 2386.99221 | 1.092600168  | 1.41E-05   |
| Prelid2  | 6207.05343 | -1.169307159 | 1.38E-08   |
| Prex1    | 14322.9912 | -2.407362133 | 3.39E-50   |
| Prf1     | 3655.60288 | 3.97534619   | 4.63E-27   |
| Prickle2 | 129.588842 | 1.702462782  | 2.08E-15   |
| Prim1    | 2141.35009 | 1.19169238   | 4.54E-07   |
| Prim2    | 5960.15317 | 1.179781544  | 4.17E-06   |
| Prkaca   | 1737.52817 | 1.07744887   | 1.19E-05   |
| Prkacb   | 9440.63147 | -1.61649778  | 1.16E-53   |
| Prkar1b  | 209.536319 | -1.69893397  | 2.13E-08   |
| Prkcq    | 27287.501  | -1.298342129 | 1.37E-11   |
| Prkcz    | 974.269715 | -2.410926639 | 6.49E-15   |
| Prkd2    | 5927.52815 | -1.081730819 | 1.44E-10   |
| Prmt1    | 3641.03129 | 1.228721547  | 5.37E-09   |
| Prmt5    | 2957.75143 | 1.308071869  | 2.09E-09   |
| Prmt8    | 83.4476107 | 1.094446017  | 1.38E-08   |
| Prpf19   | 3958.95074 | 1.241981544  | 3.75E-08   |
| Prpf40b  | 269.938432 | 1.151783782  | 1.20E-06   |
| Prr29    | 161.459921 | -1.27126865  | 7.86E-10   |
| Prr33    | 203.000948 | -1.460727932 | 6.60E-17   |
| Prr5     | 660.235447 | -1.062886669 | 0.00045971 |
| Prr7     | 1150.54191 | -1.924381022 | 7.87E-18   |
| Prrg1    | 2024.70415 | -1.101803843 | 0.00156344 |
| Prrt1    | 553.115579 | -1.458443304 | 8.13E-08   |
| Psap     | 8460.37838 | -1.048860854 | 7.95E-07   |
| Psat1    | 4834.87525 | 2.130311926  | 5.41E-25   |
| Psemb5   | 1686.0189  | 1.133996305  | 4.83E-05   |
| Psemb6   | 2563.75452 | 1.287664243  | 9.28E-07   |
| Psmc1    | 3603.57493 | 1.037099099  | 2.26E-08   |
| Psmc2    | 3160.50901 | 1.081088639  | 1.03E-09   |
| Psmc3    | 3816.98281 | 1.044719417  | 4.85E-05   |
| Psmc3ip  | 355.628693 | 1.126325184  | 1.05E-11   |
| Psmc4    | 3029.7318  | 1.090745127  | 1.19E-06   |

|           |            |              |            |
|-----------|------------|--------------|------------|
| Psmc5     | 2349.36225 | 1.257485927  | 2.39E-09   |
| Psmd1     | 4227.60035 | 1.14676746   | 2.88E-15   |
| Psmd12    | 2617.36893 | 1.057034656  | 3.38E-14   |
| Psmd2     | 6567.75033 | 1.163975143  | 2.83E-08   |
| Psmd3     | 3595.77809 | 1.049080701  | 1.19E-05   |
| Psmd7     | 2336.87565 | 1.181663565  | 2.88E-12   |
| Psmg1     | 716.352059 | 1.220462804  | 1.74E-16   |
| Psrc1     | 477.528667 | 1.611854265  | 1.05E-10   |
| Ptch1     | 4924.07597 | 1.23808765   | 1.31E-11   |
| Pter      | 309.428591 | 1.85794843   | 8.38E-19   |
| Ptges3    | 5150.95623 | 1.025743949  | 3.26E-10   |
| Ptges3-ps | 333.564473 | 1.002338261  | 3.75E-05   |
| Ptgfrn    | 887.176493 | 3.440042284  | 1.23E-35   |
| Ptgr1     | 119.740806 | 1.334103113  | 1.67E-08   |
| Ptk2      | 454.725104 | 1.079935907  | 2.08E-07   |
| Ptma      | 22492.2651 | 1.002823625  | 0.00083859 |
| Ptms      | 1848.03386 | 1.079723016  | 0.00168619 |
| Ptpn14    | 405.382051 | -1.303797171 | 3.79E-08   |
| Ptpn18    | 1692.38072 | -1.319794193 | 4.64E-06   |
| Ptpn3     | 1537.24251 | 2.833125178  | 1.19E-41   |
| Ptpn5     | 1353.58291 | 4.622370409  | 1.31E-91   |
| Ptpn6     | 6818.77503 | 1.091593624  | 3.09E-07   |
| Ptpn7     | 3680.55318 | 1.525337981  | 7.06E-08   |
| Ptprk     | 181.856509 | 1.053795505  | 0.00017719 |
| Ptprs     | 5910.70197 | 1.586738454  | 1.06E-12   |
| Ptprv     | 618.980115 | 1.439704146  | 7.79E-05   |
| Pts       | 1235.38024 | -1.209373152 | 2.21E-09   |
| Pycr1     | 158.827907 | 2.0927061    | 5.94E-19   |
| Pygl      | 463.285668 | -2.094889782 | 0.00215393 |
| Pygm      | 569.63478  | -2.444035869 | 1.30E-28   |
| Pyroxd2   | 133.496813 | -1.808658781 | 2.78E-10   |
| Qprt      | 522.069379 | -1.027996492 | 0.00013263 |
| Qser1     | 2155.92964 | 1.27704973   | 2.49E-11   |
| Rab20     | 403.355156 | -2.006409682 | 1.10E-17   |
| Rab27b    | 287.823579 | -2.637268501 | 2.92E-12   |
| Rab34     | 121.689988 | 1.857661458  | 1.03E-09   |
| Rab37     | 1339.18276 | -2.356562325 | 9.79E-28   |
| Rabggtb   | 1852.3467  | 1.200240426  | 2.24E-23   |
| Rabl2     | 124.019961 | 1.145472948  | 1.17E-06   |
| Rad51     | 2153.76041 | 1.57941126   | 1.10E-10   |
| Rad51ap1  | 1177.91548 | 1.241246989  | 2.37E-07   |
| Rad51b    | 10837.5383 | 1.129495796  | 0.00201378 |
| Rad54b    | 1350.93981 | 1.445574152  | 8.58E-07   |
| Rad54l    | 1671.74064 | 1.530349379  | 1.73E-13   |
| Raet1e    | 467.167198 | -1.078409403 | 0.00081323 |
| Rai14     | 249.254246 | 2.948868942  | 2.00E-25   |
| Ralyl     | 214.477885 | 2.671115997  | 1.88E-18   |
| Ramp3     | 186.516496 | 2.189893996  | 0.00066036 |
| Ran       | 9532.99457 | 1.395795572  | 7.38E-08   |
| Ranbp1    | 4229.24944 | 1.4420607    | 7.45E-10   |

|          |            |              |            |
|----------|------------|--------------|------------|
| Ranbp3l  | 144.9159   | -1.49905954  | 7.97E-07   |
| Rangap1  | 6984.18811 | 1.225864725  | 6.26E-09   |
| Rap1gap2 | 3366.94074 | -4.123832943 | 8.25E-58   |
| Rapgef2  | 5395.82929 | -1.103708426 | 4.40E-07   |
| Rapgef4  | 4355.66946 | -3.125758764 | 4.53E-19   |
| Rapgef5  | 262.030054 | 1.268241723  | 1.74E-05   |
| Raph1    | 2174.94994 | 2.668602306  | 7.19E-37   |
| Rarb     | 279.174726 | -1.132724195 | 0.00052206 |
| Rarg     | 1263.77601 | -2.05030185  | 9.16E-08   |
| Rasa3    | 17879.3884 | -2.392186023 | 5.10E-80   |
| Rasal2   | 404.338139 | 2.897226398  | 2.21E-14   |
| Rasal3   | 7549.92972 | -1.066127701 | 3.77E-09   |
| Rasgef1b | 1079.06631 | 1.688334077  | 4.10E-12   |
| Rasgrf2  | 653.250674 | -1.715940222 | 7.69E-10   |
| Rasgrp1  | 18476.4201 | -1.29201949  | 1.47E-10   |
| Rasgrp2  | 3405.70426 | -3.192012812 | 7.12E-44   |
| Rassf2   | 4968.66384 | -1.309816855 | 3.45E-19   |
| Raver2   | 1207.44894 | -1.308299156 | 2.70E-08   |
| Rbm20    | 405.606075 | -1.296506732 | 3.65E-15   |
| Rbms1    | 8699.44199 | -1.362240788 | 8.20E-18   |
| Rbpj     | 12741.6694 | 2.73355089   | 3.60E-42   |
| Rcctb2   | 1425.76612 | -2.14242239  | 1.24E-54   |
| Rcc1     | 2504.11917 | 1.425532301  | 6.41E-12   |
| Rcc2     | 11332.5666 | 1.145342508  | 1.08E-07   |
| Rcn3     | 448.8023   | -1.353662827 | 4.50E-09   |
| Rdh11    | 1547.84826 | 1.114900966  | 7.65E-12   |
| Rdh5     | 108.162181 | -1.214547661 | 1.39E-09   |
| Rec114   | 1100.1243  | -1.100914908 | 5.76E-05   |
| Reck     | 739.917099 | -1.121106125 | 1.94E-10   |
| Recql4   | 640.966291 | 1.933157095  | 1.34E-18   |
| Rel      | 4633.77293 | 1.048214673  | 1.70E-08   |
| Rem2     | 117.520745 | 1.383943659  | 2.93E-13   |
| Rere     | 7028.24761 | -1.247674523 | 1.19E-05   |
| Ret      | 98.0137474 | -1.998879302 | 6.42E-09   |
| Rfc2     | 2720.45016 | 1.022464063  | 1.84E-08   |
| Rfc3     | 982.59324  | 1.430430114  | 3.08E-09   |
| Rfc4     | 1446.47828 | 1.002659252  | 0.0010934  |
| Rfc5     | 2284.65044 | 1.014157293  | 3.04E-06   |
| Rflnb    | 500.614936 | -1.851884751 | 1.37E-14   |
| Rfx2     | 539.204846 | -1.81957244  | 4.82E-14   |
| Rfx3     | 5771.37189 | -1.229436064 | 0.00012666 |
| Rfx8     | 101.883296 | 1.016327721  | 9.38E-05   |
| Rgcc     | 1216.89288 | 1.072540651  | 0.00056405 |
| Rgs1     | 1308.10292 | 1.508948762  | 0.00060633 |
| Rgs10    | 2176.04663 | -1.136428999 | 2.67E-15   |
| Rgs16    | 552.318608 | 3.511181862  | 8.64E-45   |
| Rgs2     | 629.80911  | 1.333670288  | 0.02693988 |
| Rgs8     | 129.585623 | 2.052968131  | 1.40E-12   |
| Rhob     | 269.517519 | 1.697285138  | 2.82E-07   |
| Rhoc     | 346.70479  | -1.06387171  | 7.00E-09   |

|          |            |              |            |
|----------|------------|--------------|------------|
| Ric8b    | 4450.45281 | -1.063948782 | 5.91E-05   |
| Rims2    | 136.044377 | 1.694797373  | 0.000153   |
| Ripor2   | 24796.9307 | -2.561084263 | 3.00E-38   |
| Ripor3   | 249.050892 | -1.272772397 | 2.25E-06   |
| Rn7sk    | 442112.954 | -1.477254334 | 0.00029667 |
| Rnasel   | 2408.86403 | -1.291266922 | 5.09E-20   |
| Rnaset2b | 1299.76371 | -1.227947365 | 7.10E-13   |
| Rnf122   | 620.039007 | -2.132476081 | 1.41E-31   |
| Rnf126   | 1742.38963 | 1.205944392  | 7.70E-06   |
| Rnf144a  | 1726.98326 | -3.514225707 | 3.80E-58   |
| Rnf157   | 5772.07687 | 1.18242284   | 9.04E-08   |
| Rnf167   | 2335.64193 | -1.478919858 | 6.54E-28   |
| Rnu12    | 392.426076 | -1.314722234 | 0.0011879  |
| Rom1     | 373.148549 | -1.230332056 | 3.08E-08   |
| Rpa3     | 866.557281 | 1.106746129  | 0.00010658 |
| Rpn1     | 6030.69223 | 1.035225953  | 3.36E-05   |
| Rps11    | 342.219621 | -2.760841721 | 2.47E-34   |
| Rps19bp1 | 430.491481 | 1.096164934  | 7.49E-08   |
| Rps27    | 29828.6988 | -1.098583154 | 0.00114186 |
| Rps27l   | 2459.5911  | 1.324303812  | 0.00042922 |
| Rps6ka2  | 319.348452 | -1.622407367 | 4.10E-13   |
| Rras2    | 13087.973  | -1.114416897 | 2.41E-11   |
| Rrm1     | 9464.97918 | 1.497721257  | 7.60E-07   |
| Rrm2     | 6070.29322 | 1.121778533  | 0.00044397 |
| Rsrp1    | 8414.80918 | -1.050042097 | 6.15E-05   |
| Rtn4rl1  | 1204.51297 | -2.81249501  | 1.31E-29   |
| Rtp4     | 455.110565 | -2.066477354 | 2.87E-19   |
| Rundc3b  | 1552.53137 | -1.022034245 | 8.58E-07   |
| Runx1    | 6687.43974 | -1.698143856 | 9.84E-06   |
| Ruvbl1   | 2070.37871 | 1.075601909  | 6.21E-19   |
| Ruvbl2   | 2667.10952 | 1.585469216  | 6.67E-12   |
| Rxra     | 968.79414  | -1.492520534 | 2.47E-09   |
| Ryk      | 709.056836 | 2.022529625  | 6.47E-33   |
| Ryr3     | 543.230259 | -1.235821263 | 1.67E-10   |
| S100a4   | 207.656662 | -1.736968831 | 0.0066326  |
| S100a6   | 1491.54986 | -2.697388884 | 3.95E-06   |
| S1pr1    | 5885.27281 | -4.436957572 | 9.46E-101  |
| S1pr4    | 2696.6303  | -1.650151573 | 1.40E-07   |
| Samd3    | 565.286963 | -1.145152096 | 0.00430932 |
| Samd9l   | 4632.73593 | -1.931035245 | 1.59E-36   |
| Samhd1   | 20701.294  | -1.985413694 | 4.23E-48   |
| Samsn1   | 2005.14792 | 1.010038333  | 2.20E-07   |
| Sap30    | 760.30368  | 1.636324257  | 1.81E-06   |
| Saraf    | 9197.26107 | -1.30391113  | 7.53E-12   |
| Sarm1    | 109.384729 | -1.262537942 | 1.72E-09   |
| Sbf2     | 247.342392 | 1.07006863   | 0.00053406 |
| Sbk1     | 1470.10009 | -1.112032724 | 5.49E-06   |
| Sbk2     | 264.578719 | -2.140481266 | 4.02E-13   |
| Scamp1   | 488.000835 | 1.64317324   | 1.35E-22   |
| Scarb2   | 5051.82612 | -1.202726901 | 4.55E-31   |

|           |            |              |            |
|-----------|------------|--------------|------------|
| Scarf1    | 185.213546 | -1.691412057 | 5.21E-07   |
| Sccpdh    | 140.322146 | 1.801175722  | 1.89E-16   |
| Scd1      | 2100.65026 | 3.481016981  | 1.18E-09   |
| Scd2      | 15573.4017 | 1.630845208  | 1.01E-08   |
| Scd4      | 123.492688 | -1.192791174 | 1.58E-07   |
| Scml4     | 10024.6111 | -2.16016005  | 1.17E-12   |
| Sco1      | 1164.24816 | 1.189644437  | 4.43E-16   |
| Scrib     | 1809.20653 | 1.224321009  | 1.65E-08   |
| Sdc1      | 621.908362 | 4.403511426  | 1.10E-44   |
| Sdf211    | 1151.9444  | 1.681697401  | 6.47E-06   |
| Sdk1      | 546.307998 | -2.621812487 | 1.74E-15   |
| Sec22c    | 1140.71123 | -1.007759877 | 1.70E-06   |
| Sec24a    | 6089.22557 | -1.19720414  | 8.69E-09   |
| Sec31b    | 231.6492   | -2.020211629 | 3.98E-11   |
| Selenop   | 1726.37901 | -2.068525997 | 1.61E-32   |
| Sell      | 18918.395  | -1.709862508 | 1.72E-43   |
| Sema4c    | 479.41911  | 3.055068073  | 2.02E-26   |
| Sema4f    | 2068.90474 | -2.08654638  | 6.32E-27   |
| Sema6d    | 479.529725 | 3.324054792  | 2.09E-15   |
| Sema7a    | 534.788091 | 2.618784823  | 4.14E-21   |
| Senp7     | 3978.25332 | -1.280655127 | 1.11E-05   |
| Sephs2    | 1424.10076 | 1.074790592  | 4.75E-05   |
| Sept11    | 13360.2065 | 1.412103518  | 8.69E-22   |
| Sept8     | 391.828361 | -1.947846298 | 3.86E-18   |
| Serf1     | 113.61028  | 1.02401304   | 1.16E-05   |
| Serpina3g | 1259.67368 | -1.316330136 | 3.76E-09   |
| Serpinb1a | 182.754159 | -2.33163378  | 1.93E-15   |
| Serpinb6a | 1653.1592  | 1.00486942   | 1.29E-08   |
| Serpinb6b | 1485.64404 | 2.286157861  | 1.14E-10   |
| Serpinb9  | 1406.26071 | 2.012044814  | 3.28E-14   |
| Serpine1  | 174.730514 | 2.564460178  | 1.71E-13   |
| Serpine2  | 1719.23997 | 5.075930433  | 3.17E-83   |
| Serpinf1  | 189.968442 | 2.072598198  | 4.39E-20   |
| Serpini1  | 1364.62837 | -2.424867399 | 1.41E-24   |
| Sesn2     | 569.950498 | 1.610968433  | 9.86E-08   |
| Sestd1    | 922.125552 | 2.630695354  | 1.54E-64   |
| Set       | 15039.0087 | 1.210844396  | 2.62E-08   |
| Sez6l2    | 147.893497 | -1.024049198 | 1.65E-06   |
| Sf3a3     | 2724.24934 | 1.048778481  | 4.93E-10   |
| Sf3b4     | 1809.15294 | 1.053881035  | 1.95E-05   |
| Sfn       | 1315.07562 | -1.244799105 | 2.19E-07   |
| Sfrp2     | 489.290299 | -1.542416049 | 2.64E-07   |
| Sfxn3     | 1825.30363 | -1.517648671 | 4.24E-19   |
| Sgk1      | 766.035633 | -1.14162566  | 0.00303502 |
| Sgk3      | 1777.70013 | -2.433179918 | 5.06E-25   |
| Sgsh      | 863.182362 | -1.372618609 | 3.07E-14   |
| Sh2b2     | 114.225435 | 1.023315815  | 4.13E-06   |
| Sh2d3c    | 4000.14072 | -1.099202698 | 8.50E-12   |
| Sh3bp5    | 7319.21533 | -3.318250071 | 5.11E-72   |
| Sh3gl3    | 86.8091966 | 1.098985199  | 7.39E-05   |

|             |            |              |            |
|-------------|------------|--------------|------------|
| Sh3pxd2a    | 1371.42822 | -2.100584736 | 1.25E-27   |
| Sh3rf1      | 2167.62091 | 1.402950271  | 2.89E-12   |
| Shcbp1      | 1885.18532 | 1.041044895  | 0.00092083 |
| She         | 725.989785 | -3.174940985 | 3.80E-48   |
| Shisa3      | 117.65709  | -1.046903186 | 0.00017348 |
| Shmt1       | 2283.73963 | 1.499131403  | 3.73E-32   |
| Shmt2       | 4884.74913 | 1.736580851  | 6.02E-11   |
| Shpk        | 372.067058 | -1.268097802 | 2.28E-09   |
| Siah1a      | 2662.20272 | -1.383675559 | 2.40E-10   |
| Sidt1       | 10637.4217 | -2.640218435 | 3.39E-19   |
| Sike1       | 2477.33325 | -1.619737938 | 8.48E-26   |
| Sit1        | 771.744133 | -1.485785342 | 3.02E-06   |
| Ska1        | 717.962483 | 1.150380258  | 6.17E-07   |
| Ska3        | 955.154264 | 1.112351226  | 3.66E-06   |
| Skap1       | 33572.3079 | -1.112482143 | 1.57E-05   |
| Sla2        | 3393.14417 | -1.404236184 | 6.18E-13   |
| Slamf6      | 3310.96849 | -1.581076154 | 6.08E-07   |
| Slamf7      | 1170.02037 | -1.284549414 | 3.64E-08   |
| Slc12a2     | 1190.67081 | 1.07652835   | 1.96E-10   |
| Slc12a4     | 752.583564 | 1.150739593  | 6.13E-10   |
| Slc12a7     | 7784.12201 | -2.53189972  | 5.23E-32   |
| Slc12a8     | 245.51959  | 1.7245469    | 1.29E-11   |
| Slc14a1     | 2472.15471 | -3.531754414 | 3.28E-26   |
| Slc15a1     | 179.772039 | 2.192436224  | 1.07E-12   |
| Slc15a2     | 646.232642 | -2.233488662 | 1.51E-09   |
| Slc15a3     | 102.803262 | 1.298226401  | 1.73E-07   |
| Slc16a10    | 1877.91868 | 1.629536675  | 4.77E-21   |
| Slc16a11    | 196.230057 | 1.364278357  | 4.40E-09   |
| Slc16a2     | 124.349034 | -1.25435082  | 1.76E-06   |
| Slc16a3     | 3580.03933 | 2.193073148  | 3.32E-07   |
| Slc16a5     | 549.415715 | -2.546699131 | 1.26E-33   |
| Slc17a6     | 205.980597 | 2.901544799  | 2.94E-27   |
| Slc17a9     | 2040.50002 | -1.63166481  | 6.33E-11   |
| Slc19a2     | 592.759424 | 1.192299828  | 2.24E-11   |
| Slc1a2      | 227.321778 | 3.024540775  | 1.83E-34   |
| Slc1a4      | 418.503271 | 3.381293816  | 6.18E-34   |
| Slc22a15    | 616.877663 | 1.523147293  | 1.77E-08   |
| Slc25a13    | 2121.87932 | 1.462332681  | 2.74E-11   |
| Slc25a18    | 566.370542 | -1.204191529 | 2.97E-10   |
| Slc25a45    | 888.267665 | -2.160901944 | 3.73E-44   |
| Slc25a5     | 10984.504  | 1.069166369  | 1.15E-05   |
| Slc25a53    | 1375.34365 | -1.178300002 | 1.32E-08   |
| Slc26a11    | 627.43266  | -1.284259887 | 6.12E-09   |
| Slc28a2     | 6497.4946  | -1.612113461 | 1.34E-12   |
| Slc29a1     | 2123.08059 | 1.26303619   | 3.75E-10   |
| Slc2a3      | 5561.84702 | 1.16786323   | 3.85E-07   |
| Slc2a4rg-ps | 777.877807 | -1.122530372 | 2.40E-05   |
| Slc2a9      | 1812.93803 | -1.775378091 | 3.35E-10   |
| Slc30a4     | 5753.86963 | -1.860386274 | 1.67E-24   |
| Slc35d3     | 124.999    | 1.635028387  | 5.24E-07   |



|          |            |              |            |
|----------|------------|--------------|------------|
| Slc35f5  | 169.776709 | 1.46495363   | 2.00E-16   |
| Slc35g1  | 3427.93827 | -1.214738148 | 2.97E-11   |
| Slc35g2  | 123.644217 | -1.588486972 | 1.75E-07   |
| Slc36a3  | 195.208799 | -1.06404868  | 0.0056841  |
| Slc37a2  | 343.322656 | 1.592061834  | 1.62E-33   |
| Slc39a10 | 1607.1627  | 1.321691352  | 5.49E-19   |
| Slc39a4  | 334.320267 | 1.286838967  | 2.27E-06   |
| Slc3a2   | 4218.83057 | 1.002222055  | 2.63E-06   |
| Slc43a1  | 445.520981 | -1.513073115 | 7.46E-11   |
| Slc43a2  | 3648.87114 | -1.657355587 | 5.85E-24   |
| Slc43a3  | 1124.85351 | 1.537981144  | 6.84E-11   |
| Slc46a3  | 645.489257 | -1.02811806  | 1.29E-16   |
| Slc4a10  | 200.054397 | -1.75600215  | 2.26E-13   |
| Slc4a11  | 170.831277 | 1.02183993   | 2.14E-06   |
| Slc4a4   | 306.190992 | -2.270171375 | 1.21E-20   |
| Slc5a10  | 222.595272 | -1.222328689 | 4.13E-11   |
| Slc6a19  | 552.644548 | -2.498450241 | 5.68E-34   |
| Slc7a1   | 9174.37846 | 1.144533391  | 8.94E-14   |
| Slc7a3   | 172.165525 | 2.451291179  | 1.62E-17   |
| Slc9a5   | 607.856194 | 1.5473001    | 6.62E-12   |
| Slc9a7   | 1124.6895  | -1.378110292 | 0.00010485 |
| Slc9a9   | 14081.5723 | -1.724611922 | 1.33E-08   |
| Slc9b2   | 271.856364 | 2.488474748  | 1.80E-47   |
| Slco3a1  | 15518.779  | -2.988810893 | 1.20E-34   |
| Slco4a1  | 1645.64289 | 1.795685061  | 2.36E-13   |
| Sln1     | 2442.29027 | -1.81988658  | 3.87E-14   |
| Sln2     | 1054.15217 | -1.015226867 | 0.00013094 |
| Sln9     | 1256.2152  | 1.215835634  | 1.88E-05   |
| Slnpi    | 118.742675 | -1.903792292 | 3.46E-12   |
| Slurp1   | 135.651585 | -1.02488672  | 3.91E-10   |
| Smad3    | 4193.25885 | -3.669574402 | 2.28E-41   |
| Smad7    | 3729.46082 | -1.438735483 | 7.09E-20   |
| Smadp2   | 8594.01843 | -1.377034854 | 1.50E-26   |
| Smarca2  | 6670.68198 | -1.185842499 | 2.46E-08   |
| Smc2     | 6795.68609 | 1.122062195  | 5.72E-05   |
| Smim24   | 200.727646 | -1.597356133 | 1.05E-19   |
| Smo      | 323.995209 | 1.953468099  | 2.86E-08   |
| Smpd4    | 2071.39745 | 1.288198594  | 1.81E-18   |
| Smpdl3a  | 1084.45039 | -1.693470124 | 2.11E-13   |
| Sms      | 3594.78397 | 1.059122539  | 9.27E-23   |
| Smurf1   | 3744.10687 | -1.232427527 | 2.36E-08   |
| Smyd5    | 1803.12738 | 1.957592336  | 9.63E-46   |
| Snrpd2   | 1862.65465 | 1.027352439  | 0.00062477 |
| Sntb1    | 7179.88951 | -2.91521861  | 9.66E-15   |
| Sntb2    | 3542.87473 | -1.976468514 | 4.95E-24   |
| Sntg2    | 290.847887 | 3.499343668  | 7.71E-25   |
| Snx24    | 94.1929884 | 1.149549169  | 3.40E-08   |
| Snx29    | 3715.62165 | -1.080107443 | 2.78E-05   |
| Snx8     | 370.156142 | 1.388216068  | 6.00E-22   |
| Sobp     | 115.346238 | 1.442483724  | 1.91E-11   |

|         |            |              |            |
|---------|------------|--------------|------------|
| Socs3   | 1712.01781 | -1.845405701 | 1.79E-15   |
| Soga1   | 132.451697 | 1.235769216  | 3.61E-09   |
| Sorbs1  | 3066.26636 | -1.431696468 | 5.72E-07   |
| Sorcs1  | 760.288366 | 4.750982778  | 4.27E-93   |
| Sorcs2  | 2161.41588 | -5.089620595 | 7.59E-95   |
| Sorl1   | 7861.44459 | -2.13997282  | 2.09E-60   |
| Sort1   | 127.262855 | 1.449150591  | 2.67E-15   |
| Sp100   | 14162.4608 | -1.439228653 | 2.76E-18   |
| Sp4     | 5118.9555  | -1.219613217 | 1.59E-08   |
| Spag5   | 2602.05039 | 1.109393601  | 0.00010795 |
| Spata1  | 472.80418  | -1.076726962 | 5.39E-05   |
| Spata24 | 405.095532 | 1.036060722  | 3.05E-06   |
| Spata6  | 3018.45211 | -1.169268657 | 5.58E-07   |
| Spata7  | 242.822196 | 1.789104248  | 1.16E-16   |
| Spats2  | 427.912439 | 1.414708541  | 1.02E-06   |
| Spc24   | 1070.8304  | 1.178981146  | 2.24E-05   |
| Spcs3   | 3727.1197  | 1.158453881  | 6.47E-08   |
| Spdl1   | 1205.26397 | 1.348796833  | 2.24E-10   |
| Spf2    | 727.366807 | 1.674919591  | 2.00E-10   |
| Spin4   | 336.003702 | 3.233205484  | 1.84E-40   |
| Spink13 | 263.77849  | -2.889592446 | 4.01E-14   |
| Spire1  | 704.433931 | 2.158227691  | 7.50E-86   |
| Spock2  | 373.646963 | -1.15064419  | 0.00083679 |
| Spon1   | 2038.94033 | -1.81148141  | 1.05E-15   |
| Spp1    | 462.059852 | 4.171115718  | 3.05E-68   |
| Spred1  | 1217.26434 | 2.230083499  | 1.11E-31   |
| Spred2  | 4780.9486  | 1.326911208  | 3.43E-10   |
| Spry1   | 441.798458 | 1.404093058  | 1.43E-06   |
| Spry2   | 614.370323 | 3.635871464  | 1.07E-74   |
| Sqle    | 2544.30372 | 1.11889729   | 8.34E-06   |
| Srd5a3  | 875.789603 | -1.03958393  | 9.17E-16   |
| Srgap3  | 6185.97786 | 1.071156444  | 4.70E-06   |
| Srm     | 1846.81718 | 1.683213493  | 2.21E-10   |
| Srsf9   | 1692.19344 | 1.132870214  | 4.46E-11   |
| Srxn1   | 102.297963 | 1.372191101  | 1.51E-08   |
| Ssbp2   | 11613.2729 | -1.818882033 | 3.48E-08   |
| Ssh2    | 15303.351  | -1.038960241 | 3.30E-08   |
| Ssr2    | 2690.78952 | 1.283225939  | 5.66E-07   |
| Ssrp1   | 9344.18872 | 1.000050349  | 4.83E-05   |
| Ssx2ip  | 587.354058 | 1.617328287  | 4.24E-29   |
| St13    | 5016.15165 | 1.459822422  | 2.27E-28   |
| St14    | 1225.75303 | 2.352602102  | 2.11E-25   |
| St3gal1 | 2710.61665 | -2.286614964 | 9.65E-30   |
| St3gal2 | 442.839364 | 1.822535042  | 1.71E-44   |
| St3gal6 | 1165.18498 | -1.208471107 | 8.58E-05   |
| St8sia1 | 3429.80509 | -2.344178216 | 1.24E-09   |
| Stard13 | 89.527807  | 1.038137143  | 5.11E-06   |
| Stard5  | 856.420913 | -1.12987996  | 2.20E-15   |
| Stat1   | 3182.99704 | -1.371798689 | 3.14E-15   |
| Stat3   | 13649.2679 | 1.705152971  | 2.36E-14   |

|          |            |              |            |
|----------|------------|--------------|------------|
| Stau2    | 211.570431 | 1.967764717  | 9.84E-20   |
| Stil     | 2877.26298 | 1.053103935  | 4.74E-05   |
| Stim1    | 9516.90353 | -1.071848641 | 6.81E-07   |
| Stip1    | 5743.41193 | 1.30590864   | 7.17E-10   |
| Stk32c   | 268.936076 | 1.664138579  | 9.90E-14   |
| Stk38    | 7637.14684 | -1.542040656 | 1.30E-13   |
| Stk38l   | 2501.17669 | 1.134881669  | 5.80E-07   |
| Stk39    | 16724.3654 | 1.458139118  | 1.69E-10   |
| Stkld1   | 320.062497 | -1.021649825 | 7.48E-11   |
| Stom     | 126.892421 | 1.114964263  | 2.33E-06   |
| Stoml2   | 1923.37428 | 1.291119622  | 6.24E-07   |
| Ston1    | 284.589953 | 1.922533861  | 4.52E-14   |
| Ston2    | 615.635432 | 2.533110717  | 1.59E-18   |
| Stx11    | 1303.53398 | 1.708712775  | 3.37E-10   |
| Stx1a    | 1234.57246 | -1.155878156 | 0.00043275 |
| Stx2     | 1363.53513 | -1.678573826 | 3.52E-12   |
| Stxbp1   | 272.483338 | 1.528878647  | 9.79E-11   |
| Styk1    | 164.51139  | 1.221500347  | 0.00010903 |
| Styx11   | 125.185745 | -1.074421883 | 0.00037765 |
| Sugct    | 346.09776  | -1.104557863 | 0.00054401 |
| Sun2     | 8659.37432 | -1.020833278 | 1.23E-06   |
| Syce2    | 671.972807 | 1.01240567   | 1.81E-05   |
| Syne1    | 5521.61996 | -1.886971731 | 4.75E-29   |
| Syne2    | 1796.24491 | -1.636595205 | 8.83E-36   |
| Syngr1   | 162.704837 | 1.684585639  | 2.87E-14   |
| Synpo    | 1811.72008 | 1.378304711  | 8.86E-38   |
| Sypl     | 463.788784 | 1.306590178  | 2.76E-11   |
| Syt6     | 1750.6776  | -4.758720274 | 3.42E-17   |
| Syt11    | 785.685878 | -1.896750263 | 2.53E-22   |
| Syt13    | 2382.84409 | -1.097246664 | 2.24E-05   |
| Tacc3    | 2990.4746  | 1.205074932  | 2.50E-06   |
| Tagln2   | 9937.36158 | 1.173699548  | 5.76E-05   |
| Tanc1    | 5643.82698 | -1.326765503 | 9.46E-13   |
| Tanc2    | 1451.46081 | 1.021672643  | 1.37E-05   |
| Tars     | 3105.44174 | 1.305643053  | 4.16E-17   |
| Tbc1d10c | 6407.9104  | -1.283986139 | 1.57E-14   |
| Tbc1d2   | 209.920856 | -1.07527366  | 1.76E-05   |
| Tbc1d30  | 248.199832 | 1.048278384  | 1.08E-05   |
| Tbc1d31  | 1478.73801 | 1.419144015  | 6.77E-10   |
| Tbc1d7   | 406.568422 | 1.0715575    | 9.65E-17   |
| Tbcel    | 3677.66469 | -1.216063899 | 3.31E-09   |
| Tbl2     | 1269.07957 | 1.126105044  | 1.65E-08   |
| Tbl3     | 1317.16003 | 1.185874528  | 6.91E-10   |
| Tbx6     | 236.167569 | -1.267424739 | 3.47E-09   |
| Tbxa2r   | 1096.40158 | -1.157415266 | 1.29E-07   |
| Tbxas1   | 109.365521 | -1.079112973 | 1.45E-05   |
| Tcf4     | 1157.6918  | 1.292386902  | 8.82E-09   |
| Tcf7     | 1330.44459 | -2.716813292 | 6.60E-13   |
| Tcp1     | 8666.69461 | 1.369639343  | 4.79E-11   |
| Tcp11    | 131.997555 | -1.063153362 | 4.26E-09   |

|          |            |              |            |
|----------|------------|--------------|------------|
| Tcp11l2  | 1868.95905 | -3.517774812 | 7.72E-80   |
| Tcrg-C1  | 573.643776 | -2.641750567 | 7.00E-14   |
| Tcrg-C2  | 419.017379 | -1.543921844 | 4.53E-06   |
| Tcrg-C4  | 320.474828 | -1.674205841 | 5.69E-05   |
| Tctex1d1 | 165.992397 | -1.411448388 | 0.00015415 |
| Tctex1d2 | 111.923887 | 1.281036339  | 2.66E-09   |
| Tdo2     | 220.866001 | -1.781501686 | 2.45E-14   |
| Tdrd7    | 222.69332  | 1.553020053  | 8.97E-14   |
| Tdrkh    | 246.260115 | 1.624146592  | 9.87E-13   |
| Tdrp     | 1369.86288 | -2.459157939 | 5.55E-14   |
| Tead2    | 245.859027 | -1.609563422 | 7.43E-14   |
| Tecpr1   | 6717.39753 | -1.172699133 | 4.99E-11   |
| Teddm2   | 195.334242 | -1.938254985 | 9.12E-13   |
| Tenm4    | 118.297584 | 1.37045313   | 1.07E-12   |
| Terc     | 980.829002 | -1.018096887 | 0.02358094 |
| Tert     | 202.212233 | 1.112640727  | 3.16E-07   |
| Tet1     | 330.549927 | -1.131482154 | 8.85E-07   |
| Tex15    | 414.744459 | 2.17922185   | 5.37E-18   |
| Tex45    | 155.674371 | -1.601414664 | 2.45E-05   |
| Tfdp1    | 7861.23655 | 1.248822725  | 3.66E-19   |
| Tfrc     | 19803.8741 | 1.801692762  | 1.06E-13   |
| Tg       | 2320.45847 | 1.675756699  | 3.47E-12   |
| Tgfb1    | 5095.71278 | 1.028741204  | 2.72E-06   |
| Tgfb1i1  | 119.545261 | -1.296480417 | 6.31E-07   |
| Tgibr1   | 2686.48845 | -1.045770309 | 0.0001297  |
| Tgibr2   | 11340.5957 | -1.345574473 | 2.01E-24   |
| Tha1     | 285.780739 | -2.253463605 | 9.67E-46   |
| Thap3    | 956.5961   | -1.672964668 | 3.53E-13   |
| Thop1    | 1063.58362 | 2.168154021  | 1.07E-16   |
| Thra     | 965.908713 | -1.230896903 | 1.98E-06   |
| Thumpd2  | 951.407581 | -1.050842733 | 5.77E-06   |
| Ticam2   | 135.672449 | 1.049876537  | 1.26E-06   |
| Ticrr    | 2786.82331 | 1.545017195  | 3.63E-09   |
| Tigit    | 2003.97747 | 3.056802351  | 1.03E-37   |
| Timeless | 2597.21497 | 1.278098626  | 9.33E-09   |
| Timm13   | 885.909896 | 1.159862422  | 8.92E-05   |
| Timm50   | 1218.16037 | 1.659167093  | 2.37E-11   |
| Timp2    | 1524.35021 | -1.937624551 | 3.30E-13   |
| Tipin    | 2466.11775 | 1.237581245  | 2.04E-11   |
| Tirap    | 289.108343 | 1.337392445  | 1.54E-07   |
| Tjp2     | 928.316686 | 1.495858988  | 1.51E-09   |
| Tk2      | 1618.41038 | -1.655982639 | 1.59E-17   |
| Tlcd2    | 139.192769 | 1.827556761  | 1.17E-13   |
| Tldc2    | 352.636625 | -1.969411562 | 3.04E-32   |
| Tln2     | 336.10382  | 2.285740051  | 8.23E-35   |
| Tlr1     | 1848.47131 | -3.009020612 | 2.01E-73   |
| Tlr12    | 183.018125 | -2.231024798 | 3.02E-29   |
| Tlr6     | 208.30712  | -1.318970473 | 1.65E-12   |
| Tmem106c | 407.594634 | 1.067459021  | 1.63E-05   |
| Tmem108  | 497.48425  | 3.855513608  | 2.28E-50   |

|           |            |              |            |
|-----------|------------|--------------|------------|
| Tmem109   | 1683.61972 | 1.673902909  | 8.24E-12   |
| Tmem132b  | 109.686895 | -1.312317148 | 4.81E-06   |
| Tmem140   | 255.258462 | -1.507116977 | 5.65E-11   |
| Tmem163   | 4432.35007 | 2.088520469  | 7.45E-10   |
| Tmem176a  | 160.253292 | -1.468068833 | 2.24E-05   |
| Tmem176b  | 170.309606 | -1.510497219 | 1.73E-05   |
| Tmem2     | 933.623256 | 1.07219846   | 1.80E-06   |
| Tmem221   | 288.259345 | -1.533730348 | 2.04E-12   |
| Tmem237   | 374.636495 | 1.228969369  | 2.41E-12   |
| Tmem37    | 98.6597536 | -1.191265483 | 2.31E-08   |
| Tmem50b   | 851.733771 | -1.152492626 | 8.36E-24   |
| Tmem63a   | 1010.52197 | -1.082938515 | 5.58E-13   |
| Tmem67    | 289.078081 | 1.230552338  | 3.97E-14   |
| Tmem71    | 4362.84315 | -2.818746009 | 1.48E-69   |
| Tmem97    | 1262.14458 | 1.528609541  | 2.67E-11   |
| Tmod1     | 258.166488 | 1.791319647  | 2.79E-23   |
| Tmod4     | 123.239898 | -1.064590764 | 5.14E-11   |
| Tmtc3     | 345.324987 | 1.374048149  | 1.47E-07   |
| Tnc       | 97.2514503 | 1.439438883  | 8.67E-08   |
| Tnfaip1   | 987.161009 | 1.000757587  | 1.01E-15   |
| Tnfaip8l1 | 844.349728 | -1.26360324  | 4.81E-21   |
| Tnfaip8l2 | 1155.76117 | -1.320077727 | 1.17E-08   |
| Tnfrsf11a | 221.677923 | -2.063057376 | 1.55E-15   |
| Tnfrsf11b | 88.4085527 | 1.261532541  | 2.69E-06   |
| Tnfrsf14  | 1445.76651 | -1.378680755 | 1.82E-12   |
| Tnfrsf25  | 139.413445 | -1.287672721 | 6.13E-06   |
| Tnfrsf26  | 1849.86294 | -2.52279652  | 5.25E-69   |
| Tnfrsf4   | 2284.37047 | 3.70266619   | 1.88E-53   |
| Tnfsf11   | 717.835004 | 3.357379704  | 2.85E-26   |
| Tnfsf4    | 233.105166 | 2.283541131  | 1.18E-15   |
| Tnfsf8    | 6286.52152 | -1.206299499 | 1.54E-06   |
| Tnfsf9    | 118.26649  | 1.01750016   | 1.12E-07   |
| Tnk2      | 1393.42903 | 1.279962182  | 3.91E-06   |
| Tnn       | 258.937284 | -1.622527793 | 8.38E-06   |
| Tnnt3     | 178.824985 | -1.769122295 | 5.18E-20   |
| Tns1      | 1624.81172 | 1.21744632   | 1.24E-06   |
| Tns3      | 117.318418 | 1.491308378  | 4.15E-11   |
| Tomm40    | 2481.86781 | 1.296522515  | 2.35E-12   |
| Tox       | 11556.9665 | 1.557806796  | 4.11E-06   |
| Tpbgl     | 102.159888 | -1.23071809  | 6.28E-08   |
| Tpcn2     | 1828.06137 | -1.683666074 | 5.26E-07   |
| Tpi1      | 16559.3598 | 1.69324456   | 0.00013449 |
| Tpmt      | 189.53206  | 1.127236994  | 2.89E-12   |
| Tpst2     | 4600.84    | -1.454188475 | 9.20E-16   |
| Tpx2      | 4971.32834 | 1.185615343  | 3.33E-05   |
| Traf3ip3  | 6722.862   | -1.187539661 | 5.87E-17   |
| Traf4     | 1659.87605 | 1.094520409  | 8.18E-06   |
| Traip     | 1040.83879 | 1.294957246  | 2.43E-10   |
| Tram2     | 1429.04834 | -1.17794857  | 1.02E-10   |
| Trat1     | 455.236045 | -1.515258212 | 1.44E-10   |

|                |            |              |            |
|----------------|------------|--------------|------------|
| Trav14-1       | 263.713801 | -1.204694492 | 6.16E-06   |
| Trav15-2-dv6-2 | 172.054012 | -1.093193364 | 5.40E-07   |
| Trbj1-1        | 798.425151 | -1.023908878 | 2.35E-10   |
| Trdc           | 505.5109   | -1.176206106 | 1.85E-10   |
| Trib2          | 2300.74807 | -1.290538921 | 2.28E-15   |
| Trim12a        | 3150.91086 | -1.466456711 | 8.61E-12   |
| Trim15         | 174.762977 | -1.030930706 | 1.51E-09   |
| Trim28         | 8267.03747 | 1.034680575  | 0.00011052 |
| Trim30c        | 434.235263 | -3.298643413 | 2.30E-29   |
| Trim47         | 148.411481 | -1.332522606 | 5.52E-07   |
| Trim5          | 1284.29487 | -1.407142038 | 7.22E-15   |
| Trim65         | 304.470057 | -1.085460953 | 1.09E-09   |
| Trip13         | 1421.4728  | 2.011919412  | 5.49E-19   |
| Troap          | 645.123422 | 1.057638058  | 7.45E-05   |
| Trp53cor1      | 137.24016  | 1.614070309  | 7.21E-10   |
| Trp53inp1      | 5800.198   | -1.388579056 | 2.00E-13   |
| Tsc22d3        | 2046.37456 | -1.532260086 | 3.25E-11   |
| Tspan13        | 4384.41509 | -1.239675977 | 8.13E-26   |
| Tspan2         | 1256.58651 | 1.014080414  | 1.27E-05   |
| Tspan6         | 139.613764 | 1.610387549  | 8.62E-14   |
| Tspan9         | 122.099091 | -1.172283409 | 0.00081831 |
| Ttc17          | 4100.75551 | -1.040952373 | 1.05E-06   |
| Ttc26          | 118.017312 | 1.615195796  | 8.50E-16   |
| Ttc38          | 1083.95581 | -1.495613534 | 1.40E-26   |
| Ttc39c         | 1948.0114  | 4.645748346  | 2.39E-54   |
| Ttc7           | 6783.32094 | -1.036283469 | 3.88E-08   |
| Ttk            | 1317.31545 | 1.159323535  | 9.50E-06   |
| Ttyh3          | 2820.58011 | -1.457728759 | 3.91E-15   |
| Tuba1b         | 11787.2214 | 1.378410785  | 0.00020246 |
| Tuba1c         | 3107.72138 | 1.179857894  | 0.00017251 |
| Tubb2a         | 329.772729 | 1.004769817  | 0.000333   |
| Tubb2b         | 176.674084 | 1.476811973  | 6.25E-09   |
| Tubb4b         | 6269.32948 | 1.275544503  | 0.00022631 |
| Tubb6          | 1303.69409 | 3.133914723  | 5.74E-28   |
| Tube1          | 614.731415 | 1.22010937   | 6.18E-10   |
| Tubg1          | 1265.13938 | 1.465758401  | 9.57E-08   |
| Tufm           | 1666.7358  | 1.411459178  | 1.38E-08   |
| Twf2           | 2719.2369  | -1.039002146 | 1.19E-07   |
| Twist2         | 171.10528  | 2.595617757  | 7.09E-35   |
| Twsg1          | 2382.73598 | 2.098599868  | 1.78E-71   |
| Txk            | 7742.13798 | -2.514810688 | 3.84E-28   |
| Txn1           | 5914.99438 | 1.246898051  | 1.24E-06   |
| Tyrobp         | 101.641187 | -1.337822847 | 2.27E-07   |
| Uba7           | 1779.77452 | -1.509014278 | 6.33E-12   |
| Ubal1          | 1832.20539 | -1.152573374 | 3.23E-11   |
| Ubash3b        | 12594.3066 | 1.18071899   | 7.70E-09   |
| Ube2c          | 2178.98498 | 1.023657808  | 0.00354072 |
| Ube2e2         | 423.074085 | 2.119231806  | 1.94E-16   |
| Ube2h          | 9915.40684 | -1.226797532 | 3.20E-10   |
| Ube2m          | 2825.16964 | 1.220319473  | 1.53E-07   |

|          |            |              |            |
|----------|------------|--------------|------------|
| Ubqln4   | 1818.42093 | 1.209974119  | 6.30E-12   |
| Ubttd1   | 837.219437 | -1.205728753 | 0.00013268 |
| Uchl5    | 2184.29931 | 1.11128704   | 1.28E-07   |
| Uhrf1    | 9453.14895 | 1.64272603   | 1.33E-07   |
| Uhrf1bp1 | 776.87649  | 1.27421099   | 6.87E-11   |
| Umps     | 2059.70574 | 1.391089822  | 1.38E-10   |
| Unc119   | 385.051393 | 1.010851074  | 0.00037799 |
| Unc5a    | 183.212878 | -1.559304501 | 9.68E-13   |
| Unc5cl   | 1807.96032 | -2.039640259 | 8.19E-07   |
| Ung      | 1085.14296 | 1.356101987  | 9.25E-09   |
| Upp1     | 146.541986 | 1.993733872  | 1.01E-10   |
| Uqcr10   | 1750.6351  | 1.102948135  | 0.00035342 |
| Uqcrq    | 1891.26699 | 1.13393752   | 0.00040476 |
| Use1     | 1723.5184  | -1.042646076 | 0.0001778  |
| Usp20    | 1139.36917 | -1.020049302 | 1.71E-13   |
| Usp28    | 6147.32797 | -2.01585978  | 5.91E-13   |
| Usp3     | 14454.9534 | -1.747454501 | 2.49E-18   |
| Usp50    | 270.662999 | -1.115412515 | 4.23E-12   |
| Usp6nl   | 2071.0444  | 1.183593125  | 1.52E-05   |
| Ust      | 9082.39353 | -1.424864643 | 3.91E-06   |
| Utp11    | 1276.56884 | 1.076892801  | 5.31E-21   |
| Utp20    | 4678.33136 | 1.014886655  | 3.74E-12   |
| Utrn     | 35605.6445 | -1.31180473  | 2.73E-08   |
| Vash1    | 134.378784 | 1.191046166  | 1.64E-07   |
| Vat1     | 1118.40684 | 1.041138975  | 2.94E-06   |
| Vav2     | 1597.71382 | 1.491919247  | 5.56E-10   |
| Vcan     | 163.362358 | 1.153113863  | 2.60E-08   |
| Vcl      | 1298.00568 | 1.220674818  | 3.99E-08   |
| Vdac1    | 5735.05355 | 1.092338493  | 1.65E-08   |
| Vegfa    | 888.162505 | 1.117414142  | 0.01198287 |
| Vipr1    | 961.114915 | -3.436004096 | 1.73E-65   |
| Vldlr    | 159.608153 | 1.628967767  | 0.00012199 |
| Vmac     | 389.396593 | -1.290081953 | 6.68E-09   |
| Vmn2r96  | 278.41662  | -1.69345204  | 2.14E-07   |
| Vmn2r97  | 114.649979 | -1.108000184 | 7.40E-05   |
| Vrk3     | 1743.57767 | -1.683183038 | 5.53E-29   |
| Vsig2    | 154.725088 | 2.023748349  | 7.04E-17   |
| Vwa3b    | 312.199734 | -2.968112341 | 6.87E-30   |
| Vwa5a    | 1738.12363 | -1.446333331 | 7.05E-15   |
| Vwa8     | 4072.28829 | 1.056890297  | 8.01E-05   |
| Wdfy2    | 829.832232 | 1.036229097  | 6.99E-11   |
| Wdhd1    | 3389.77045 | 1.433337041  | 2.74E-13   |
| Wdpcp    | 615.391296 | 1.088819004  | 0.00020754 |
| Wdr18    | 1491.42434 | 1.372993476  | 9.93E-15   |
| Wdr31    | 110.218831 | 1.134355965  | 5.87E-08   |
| Wdr35    | 344.763711 | 2.112731552  | 6.95E-34   |
| Wdr37    | 5546.37862 | -1.020956818 | 7.01E-05   |
| Wdr41    | 832.789679 | -1.18322254  | 1.34E-05   |
| Wdr49    | 168.092506 | -1.386923977 | 2.20E-07   |
| Wdr54    | 105.43829  | 1.048884977  | 0.0001178  |

|         |            |              |            |
|---------|------------|--------------|------------|
| Wdr60   | 215.335724 | 2.189688839  | 2.62E-50   |
| Wdr62   | 1064.9845  | 1.189765022  | 8.04E-06   |
| Wdr66   | 150.525322 | -1.185863139 | 1.63E-06   |
| Wdr76   | 2990.63661 | 1.05229435   | 9.12E-07   |
| Wdr78   | 892.616968 | -1.138933089 | 1.47E-05   |
| Wdr86   | 180.81292  | -1.332166358 | 3.38E-12   |
| Wdr95   | 204.954659 | -2.065367684 | 1.33E-09   |
| Wnk3    | 191.545726 | -1.062273804 | 0.0017177  |
| Wnt10b  | 436.063262 | 3.436232417  | 1.80E-47   |
| Xbp1    | 2329.0352  | 1.370453515  | 2.14E-06   |
| Xkr5    | 334.910512 | 1.118517963  | 6.06E-07   |
| Xpot    | 3864.01643 | 1.280116388  | 2.27E-27   |
| Xrra1   | 219.291454 | -1.034113574 | 1.47E-07   |
| Yap1    | 144.345003 | 1.557603214  | 1.18E-19   |
| Yars    | 3014.90448 | 1.496837374  | 1.31E-25   |
| Ybx1    | 14482.4541 | 1.637367192  | 1.46E-12   |
| Ybx3    | 8615.30496 | 1.733783386  | 6.72E-23   |
| Ypel1   | 563.44189  | -1.572524695 | 4.12E-14   |
| Ypel2   | 866.976248 | 2.077999358  | 2.64E-22   |
| Ypel3   | 1408.71087 | -2.189405468 | 4.50E-23   |
| Ypel5   | 1603.45684 | -1.313690846 | 1.97E-13   |
| Zan     | 195.469518 | 1.499549061  | 1.11E-08   |
| Zbp1    | 1941.61346 | -1.649836454 | 3.50E-12   |
| Zbtb10  | 257.108331 | -1.140220154 | 9.45E-08   |
| Zbtb20  | 20200.6993 | -1.415307045 | 5.42E-05   |
| Zbtb32  | 2300.139   | 4.230201795  | 1.07E-85   |
| Zbtb4   | 1961.2313  | -2.088037341 | 5.38E-23   |
| Zbtb7b  | 424.75006  | 1.598386688  | 5.40E-06   |
| Zbtb8a  | 439.197845 | -1.088249273 | 2.79E-13   |
| Zc3h12a | 2008.14979 | -1.389644428 | 2.88E-08   |
| Zc3h12c | 100.148234 | 1.250434157  | 5.00E-11   |
| Zc3h6   | 1927.07965 | -1.577518213 | 0.00051642 |
| Zdhhc15 | 2025.87262 | -1.243844073 | 2.27E-05   |
| Zdhhc17 | 2055.07023 | -1.283026452 | 1.70E-07   |
| Zdhhc19 | 146.567533 | -1.159810055 | 1.52E-07   |
| Zdhhc2  | 1170.98791 | 1.144440354  | 1.99E-06   |
| Zeb2    | 954.440628 | 3.096862327  | 5.10E-35   |
| Zfand4  | 530.101024 | 1.051282993  | 8.06E-05   |
| Zfp12   | 941.458963 | -1.028203273 | 2.70E-06   |
| Zfp219  | 1419.41447 | 1.851142555  | 8.42E-26   |
| Zfp260  | 1757.22765 | -1.0954164   | 5.16E-09   |
| Zfp280b | 3439.82876 | 1.815336187  | 1.49E-20   |
| Zfp36   | 2519.49832 | -1.48027565  | 4.87E-07   |
| Zfp362  | 1686.93057 | -1.099783083 | 1.53E-07   |
| Zfp386  | 2481.33773 | -1.950946439 | 3.20E-26   |
| Zfp41   | 429.369351 | 1.024273834  | 2.24E-06   |
| Zfp429  | 212.297026 | -1.080032709 | 7.70E-08   |
| Zfp455  | 233.797461 | -1.080449123 | 2.37E-06   |
| Zfp518b | 175.180346 | 1.004725986  | 1.49E-07   |
| Zfp52   | 1049.81408 | 1.693307071  | 5.58E-13   |



|           |            |              |          |
|-----------|------------|--------------|----------|
| Zfp608    | 3303.22426 | 1.432178901  | 8.29E-07 |
| Zfp652    | 5703.41057 | -1.929393652 | 1.01E-19 |
| Zfp710    | 1329.03011 | -1.229904583 | 1.74E-07 |
| Zfp768    | 145.919021 | 1.658316982  | 1.23E-13 |
| Zfp773    | 230.539564 | -1.194074287 | 9.78E-05 |
| Zfp831    | 3073.29587 | -1.231769353 | 5.96E-05 |
| Zfp862-ps | 344.424951 | 1.675557355  | 7.51E-21 |
| Zfp870    | 135.845694 | 1.881968438  | 3.53E-23 |
| Zfp874b   | 454.276814 | -1.198764743 | 6.19E-12 |
| Zfp945    | 1012.7188  | -2.492680701 | 4.97E-21 |
| Zfp948    | 718.463564 | 1.652253301  | 7.96E-06 |
| Zfp976    | 113.176877 | 1.28307821   | 4.75E-07 |
| Zfr2      | 217.001496 | -1.438129588 | 8.65E-07 |
| Zgrf1     | 2885.80535 | 1.157649105  | 3.54E-06 |
| Zmynd12   | 136.226969 | -1.360375617 | 1.83E-07 |
| Znrf2     | 9463.49173 | -1.180446505 | 9.92E-10 |
| Zwilch    | 1279.41126 | 1.693535843  | 8.69E-17 |
