# Supplementary material for: Rapid in vitro generation of bona fide exhausted CD8+ T cells is accompanied by Tcf7 promotor methylation
Source: PubMed Central journal article supplement (PMC7340326; doi:10.1371/journal.ppat.1008555), 2020-06-24
Supplement: ppat.1008555.s008.pdf [file ppat.1008555.s008.pdf]

| Gene name     | Fold Change |
|---------------|-------------|
| Haghl         | 6.10        |
| Ccdc78        | 6.10        |
| Hic1          | 5.02        |
| Terf2         | 4.53        |
| mmu-mir-7075  | 4.53        |
| Trav13d-2     | 3.99        |
| Gm22          | 3.90        |
| Dnajc11       | 3.81        |
| Rara          | 3.64        |
| Trim65        | 3.52        |
| A630014C17Rik | 3.30        |
| 1700067K01Rik | 3.19        |
| Unc80         | 3.12        |
| Col8a2        | 3.09        |
| Gm16534       | 3.09        |
| Plekho1       | 3.08        |
| Olf94         | 3.05        |
| Acp5          | 3.04        |
| C4b           | 2.91        |
| Gtf3c2        | 2.90        |
| Hnf1a         | 2.87        |
| 2310042D19Rik | 2.81        |
| Fes           | 2.79        |
| Gm11695       | 2.78        |
| Slc16a5       | 2.78        |
| H2-Ke6        | 2.77        |
| Cactin        | 2.77        |
| Gm23547       | 2.76        |
| Ush1c         | 2.75        |
| Ttll3         | 2.73        |
| Hras          | 2.69        |
| Lrrc56        | 2.69        |
| Gm26551       | 2.68        |
| Pnpla1        | 2.66        |
| P4htm         | 2.65        |
| Mapk13        | 2.55        |
| 2310011J03Rik | 2.53        |
| Hnf1a         | 2.53        |
| Mef2b         | 2.51        |
| Gm15932       | 2.51        |
| Fitm1         | 2.51        |
| Emc8          | 2.51        |
| Tmem54        | 2.49        |
| Tekt4         | 2.48        |
| Gm15821       | 2.47        |

## S2 Table

Differentially methylation of TSS regions was determined by MeD-seq. Fold change is show for repeat peptide OT-I versus single peptide stimulated OT-I. After 5 day cultures, cells were sorted and MeD-seq was performed. Greater than 2-fold changes shown.

|              |      |
|--------------|------|
| mmu-mir-7005 | 2.46 |
| Ssh3         | 2.44 |
| Fam179a      | 2.44 |
| Gm20492      | 2.43 |
| Hoga1        | 2.41 |
| Lnx2         | 2.41 |
| Polr1d       | 2.41 |
| Mir219-2     | 2.39 |
| Zcchc14      | 2.38 |
| Gm27030      | 2.38 |
| Bcat2        | 2.37 |
| Mak16        | 2.37 |
| Fam83g       | 2.36 |
| Nfatc2       | 2.35 |
| Gm24958      | 2.34 |
| Slc11a1      | 2.34 |
| Mfrp         | 2.34 |
| Ncmap        | 2.34 |
| Raet1e       | 2.33 |
| H60b         | 2.33 |
| Gnmt         | 2.33 |
| Gm24366      | 2.32 |
| H2-Ke2       | 2.32 |
| Ccnd3-ps     | 2.32 |
| Gm10687      | 2.31 |
| Mcam         | 2.31 |
| Mrps24       | 2.31 |
| Pxn          | 2.31 |
| Tor2a        | 2.30 |
| Apoe         | 2.30 |
| Col11a2      | 2.30 |
| Vps51        | 2.29 |
| BC048609     | 2.29 |
| Gm26592      | 2.29 |
| BC100451     | 2.29 |
| Gm16069      | 2.28 |
| Fam189b      | 2.28 |
| AU023871     | 2.28 |
| Ly6g6c       | 2.28 |
| Hras         | 2.27 |
| Lrrc56       | 2.27 |
| Gm11959      | 2.27 |
| mmu-mir-7687 | 2.27 |
| Caskin2      | 2.26 |
| Tsen54       | 2.26 |
| Padi3        | 2.26 |
| Gm13032      | 2.26 |

|               |      |
|---------------|------|
| Rpl18         | 2.25 |
| Dbnidd1       | 2.25 |
| C920011F04Rik | 2.25 |
| mmu-mir-6927  | 2.24 |
| GNAS-AS1_1    | 2.24 |
| Ctr9          | 2.23 |
| Pdxk          | 2.23 |
| mmu-mir-6913  | 2.22 |
| Gm13294       | 2.22 |
| Zfp575        | 2.20 |
| Ethe1         | 2.20 |
| Ocr1          | 2.19 |
| mmu-mir-6996  | 2.19 |
| Shd           | 2.18 |
| Grina         | 2.18 |
| Gm15598       | 2.17 |
| Tssk3         | 2.17 |
| Fam229a       | 2.17 |
| Mmp14         | 2.17 |
| Efcab4a       | 2.16 |
| Gm10814       | 2.15 |
| Gm13784       | 2.15 |
| Chrng         | 2.14 |
| Cygb          | 2.14 |
| Grb7          | 2.14 |
| Bcl6b         | 2.14 |
| Ttyh3         | 2.14 |
| Padi3         | 2.13 |
| Gm13032       | 2.13 |
| Hirip3        | 2.12 |
| C1qtnf5       | 2.10 |
| Gm20444       | 2.10 |
| Six5          | 2.10 |
| Gm26519       | 2.10 |
| Gm11405       | 2.09 |
| Bak1          | 2.09 |
| Sapcd1        | 2.08 |
| Gm16120       | 2.08 |
| mmu-mir-8093  | 2.08 |
| Fam101a       | 2.08 |
| Cul7          | 2.08 |
| Arhgap27      | 2.08 |
| Gm11641       | 2.08 |
| Kat2a         | 2.08 |
| Hspb9         | 2.08 |
| Rab3a         | 2.08 |
| Hspb1         | 2.07 |

|               |       |
|---------------|-------|
| Lcat          | 2.07  |
| Mir219-2      | 2.07  |
| mmu-mir-7235  | 2.07  |
| Mir338        | 2.07  |
| Itpripl2      | 2.06  |
| Apba3         | 2.06  |
| Sms           | 2.06  |
| Gm11537       | 2.05  |
| Ifitm1        | 2.05  |
| Ghdc          | 2.05  |
| Caskin2       | 2.05  |
| Fam83f        | 2.05  |
| Lamb2         | 2.05  |
| n-R5s151      | 2.04  |
| Gm11959       | 2.04  |
| Gm20444       | 2.04  |
| Pde4c         | 2.03  |
| Kctd17        | 2.03  |
| Kcnmb1        | 2.03  |
| Tenc1         | 2.03  |
| Mir3057       | 2.03  |
| Gm13826       | 2.02  |
| Tcrg-V3       | 2.02  |
| Col11a2       | 2.02  |
| Celsr1        | 2.02  |
| Spaca4        | 2.02  |
| mmu-mir-6939  | 2.02  |
| Tpsb2         | 2.02  |
| RP24-312B12.1 | 2.01  |
| Cyba          | 2.01  |
| Itgae         | 2.01  |
| Agap2         | 2.00  |
| Gm23135       | 2.00  |
| mmu-mir-7032  | 2.00  |
| Tcf7          | 2.00  |
| mmu-mir-6990  | 2.00  |
| 1700120G11Rik | -2.00 |
| Gm9839        | -2.01 |
| Gm14458       | -2.02 |
| Gm14231       | -2.03 |
| Slc37a1       | -2.03 |
| Usp7          | -2.04 |
| Arhgap28      | -2.06 |
| 1700080E11Rik | -2.06 |
| Gm14920       | -2.07 |
| Cep120        | -2.07 |
| 1700031F05Rik | -2.07 |

|               |       |
|---------------|-------|
| C230088H06Rik | -2.07 |
| Gm13152       | -2.07 |
| Olfr139       | -2.07 |
| 9330158H04Rik | -2.08 |
| Pam           | -2.08 |
| Atic          | -2.08 |
| Gm26644       | -2.10 |
| Gm20706       | -2.10 |
| Casp6         | -2.10 |
| Cobll1        | -2.11 |
| Gm13594       | -2.11 |
| Khdc1b        | -2.11 |
| Plaur         | -2.11 |
| Ryk           | -2.12 |
| Gm13046       | -2.12 |
| Mkx           | -2.14 |
| Pdgfrl        | -2.14 |
| Stxbp1        | -2.15 |
| Gm13524       | -2.15 |
| Tbc1d4        | -2.16 |
| Trav9-1       | -2.16 |
| Rpl31         | -2.17 |
| Sv2c          | -2.17 |
| Gm13967       | -2.18 |
| Rfpl4b        | -2.19 |
| Gm15164       | -2.19 |
| Rpl22-ps1     | -2.20 |
| Gm15477       | -2.20 |
| Dclk3         | -2.20 |
| Pdcd1         | -2.20 |
| Fam216a       | -2.21 |
| Gpn3          | -2.21 |
| Gm24196       | -2.22 |
| Tnf           | -2.22 |
| App           | -2.22 |
| Gm15138       | -2.23 |
| Mob2          | -2.23 |
| Usp7          | -2.23 |
| Sh2d1a        | -2.23 |
| Pgm3          | -2.23 |
| Rwdd2a        | -2.23 |
| Gm20482       | -2.24 |
| Gm10742       | -2.25 |
| Gm5174        | -2.25 |
| n-R5s68       | -2.26 |
| Gm24850       | -2.26 |
| Lap3          | -2.26 |

|               |       |
|---------------|-------|
| Gm13943       | -2.27 |
| Zdhhc14       | -2.28 |
| Gm23479       | -2.28 |
| Ndufs1        | -2.28 |
| Eef1b2        | -2.28 |
| Clec14a       | -2.29 |
| Gm14651       | -2.30 |
| Gm4910        | -2.31 |
| 2410137F16Rik | -2.32 |
| Fbxo41        | -2.33 |
| Gm10713       | -2.33 |
| Gm15904       | -2.34 |
| Rcan2         | -2.34 |
| App           | -2.35 |
| Itgb6         | -2.38 |
| uc_338        | -2.38 |
| Gm26457       | -2.38 |
| Snora41       | -2.38 |
| Ndufs1        | -2.39 |
| Eef1b2        | -2.39 |
| Arhgef4       | -2.40 |
| Unc80         | -2.40 |
| Mau2          | -2.40 |
| Sugp1         | -2.40 |
| Pawr          | -2.40 |
| Gm26814       | -2.42 |
| Ier3          | -2.42 |
| Flot1         | -2.42 |
| Prdm6         | -2.44 |
| Gm26500       | -2.45 |
| Gm40          | -2.46 |
| Wdfy1         | -2.46 |
| Mrpl44        | -2.46 |
| Gira1         | -2.46 |
| Gm11608       | -2.48 |
| Gm24513       | -2.48 |
| Zdbf2         | -2.48 |
| Rps6ka2       | -2.48 |
| Sh2b1         | -2.49 |
| Grb14         | -2.50 |
| Cdk13         | -2.51 |
| A730020E08Rik | -2.51 |
| Ccser1        | -2.51 |
| App           | -2.52 |
| Prkce         | -2.52 |
| Gm14120       | -2.52 |
| Nlrp5         | -2.53 |

|               |       |
|---------------|-------|
| Usp46         | -2.54 |
| PVT1_5        | -2.54 |
| R3hdm4        | -2.54 |
| Kiss1r        | -2.54 |
| 5330438I03Rik | -2.55 |
| Gm24281       | -2.56 |
| Gm27003       | -2.56 |
| Gm7113        | -2.57 |
| Surf4         | -2.57 |
| Gm711         | -2.57 |
| Gm9946        | -2.59 |
| Olfr115       | -2.60 |
| Lmbrd1        | -2.61 |
| Serinc5       | -2.63 |
| Maf           | -2.63 |
| Zcrb1         | -2.63 |
| Pphln1        | -2.63 |
| Gm15762       | -2.64 |
| AI646519      | -2.65 |
| Pax1          | -2.65 |
| Steap1        | -2.65 |
| Olfr90        | -2.68 |
| Gm11992       | -2.68 |
| Taar9         | -2.69 |
| Gm13963       | -2.70 |
| Tub           | -2.70 |
| Rab12         | -2.70 |
| Gzmb          | -2.71 |
| Mettl25       | -2.71 |
| Ccdc59        | -2.71 |
| Rpl31         | -2.73 |
| Tex13a        | -2.74 |
| Prdm6         | -2.80 |
| Cckbr         | -2.80 |
| Taar9         | -2.82 |
| Mboat7        | -2.83 |
| Tsen34        | -2.83 |
| Gm21411       | -2.83 |
| Gm3654        | -2.83 |
| 8030462N17Rik | -2.83 |
| 4930465K10Rik | -2.83 |
| Paxip1        | -2.84 |
| Gm24462       | -2.85 |
| Tnfrsf4       | -2.87 |
| Ston1         | -2.87 |
| Tcf7l2        | -2.87 |
| Mboat7        | -2.88 |

|               |       |
|---------------|-------|
| Tsen34        | -2.88 |
| 1700015F17Rik | -2.89 |
| Jmy           | -2.90 |
| Wnt5a         | -2.94 |
| Defa-ps12     | -2.95 |
| Sv2c          | -2.99 |
| Csnk2a1-ps    | -2.99 |
| Fam135b       | -2.99 |
| Nxf7          | -3.00 |
| Sctr          | -3.04 |
| Cdh11         | -3.06 |
| Olf2r2        | -3.08 |
| 1700024P16Rik | -3.12 |
| Rad51         | -3.14 |
| Dmrt2         | -3.14 |
| Sorcs1        | -3.14 |
| Cdk13         | -3.18 |
| Ccdc43        | -3.28 |
| Fras1         | -3.29 |
| Tyw5          | -3.29 |
| 9430016H08Rik | -3.29 |
| Fam207a       | -3.34 |
| H2-Q2         | -3.37 |
| Lrrtm4        | -3.39 |
| Tm7sf2        | -3.41 |
| Gm12710       | -3.43 |
| Tom1l1        | -3.44 |
| Grpr          | -3.48 |
| Gm5742        | -3.49 |
| Cux1          | -3.56 |
| Asb1          | -3.58 |
| Edaradd       | -3.60 |
| AF357341      | -3.67 |
| Mir882        | -3.67 |
| Gm22981       | -3.67 |
| Gm25856       | -3.67 |
| Gm13732       | -3.71 |
| Lphn2         | -3.78 |
| Ehhadh        | -3.81 |
| Gm10742       | -3.86 |
| Gm23982       | -3.89 |
| Chst9         | -3.90 |
| Rprd1a        | -3.93 |
| Zadh2         | -3.99 |
| Cd93          | -4.02 |
| Melk          | -4.07 |
| Rcan2         | -4.07 |



|               |        |
|---------------|--------|
| Lpcat1        | -4.17  |
| Traj29        | -4.17  |
| Traj28        | -4.17  |
| Traj27        | -4.17  |
| Ensa          | -4.28  |
| Cachd1        | -4.28  |
| Acpp          | -4.35  |
| 1700104B16Rik | -4.37  |
| Gtf2e2        | -4.37  |
| Sept10        | -4.43  |
| Sowahc        | -4.43  |
| Sowahc        | -4.43  |
| Grm8          | -4.45  |
| Wapal         | -4.45  |
| Cldn26        | -4.50  |
| Zbtb21        | -4.53  |
| Gm10742       | -4.55  |
| Jmy           | -4.63  |
| Prkd1         | -4.67  |
| Gm5334        | -4.68  |
| Ccdc39        | -4.85  |
| Elovl1        | -4.94  |
| Bag2          | -4.97  |
| Leprot        | -5.12  |
| Pdcd1         | -5.20  |
| Gm24382       | -5.28  |
| 4930525G20Rik | -5.32  |
| Calcr         | -5.82  |
| Sv2c          | -5.96  |
| Gm22313       | -6.03  |
| E330034G19Rik | -6.27  |
| Scn1a         | -6.39  |
| Gm13629       | -6.39  |
| Kdm4a         | -6.40  |
| Fbxl3         | -6.72  |
| Gm23965       | -7.10  |
| Fkbp3         | -7.24  |
| Fancm         | -7.24  |
| Melk          | -9.27  |
| Pon2          | -9.70  |
| Ces1d         | -9.90  |
| Gm14736       | -11.56 |
| Cux1          | -12.71 |
